# Supplementary material for: Causal Genes and Immune-Epigenetic Mechanisms Underlying Polycystic Ovary Syndrome: A Multi-Omics Mendelian Randomization Study
Source: Research Square preprint supplement (doi:10.21203/rs.3.rs-7532908/v1), 2025-09-30
Supplement: Supplementary file 1 [file 8fd96be9e61043938a13ea2d.xlsx]

## Sheet: Catalog
Catalog
Table S1	Full results of eQTL-based Mendelian randomization analysis for PCOS
Table S2	Full results of pQTL-based Mendelian randomization analysis for PCOS
Table S3	Overlapping genes identified by both eQTL- and pQTL-based Mendelian randomization analyses
Table S4	SMR results of 60 candidate genes associated with PCOS
Table S5	Mediation MR results of CpG sites regulating IL6R and SNAP29
Table S6	Cell type–specific MR results based on sc-eQTLs across 14 immune cell types
Supplementary Data 1	Instrumental variables used in eQTL-based MR analysis.zip
Supplementary Data 2	Instrumental variables used in pQTL-based MR analysis.zip
Supplementary Data 3	Instrumental variables used in mQTL-based mediation MR analysis.zip
Supplementary Data 4	Instrumental variables used in sc-eQTL-based MR analysis.zip

## Sheet: Table S1
Table S1.Full results of eQTL-based Mendelian randomization analysis for PCOS
exposure	method	nsnp	beta	se	or	or_lci95	or_uci95	pvalue	Heter.Stat	Heter.p	egger_intercept	egger_intercept_se	egger_intercept_pval
7SK	Inverse variance weighted	4	0.0460546	0.122664	1.04713	0.823356	1.33173	0.707323	4.50159	0.212149	0.0742687	0.0966248	0.52247
A-575C2.4	Inverse variance weighted	2	0.0131643	0.225023	1.01325	0.651889	1.57493	0.953349	NA	NA	NA	NA	NA
A1BG-AS1	Inverse variance weighted	6	-0.182078	0.118138	0.833536	0.661246	1.05072	0.123261	4.63903	0.461499	0.0391439	0.0324252	0.293856
A2M-AS1	Inverse variance weighted	16	0.0323339	0.0417336	1.03286	0.951739	1.1209	0.438476	6.85994	0.96142	-0.00781973	0.025179	0.760706
A2M	Inverse variance weighted	10	0.0982758	0.12119	1.10327	0.870005	1.39907	0.417409	3.43244	0.944662	-0.016059	0.0487811	0.750453
A2MP1	Inverse variance weighted	27	0.0443733	0.0291167	1.04537	0.987385	1.10677	0.127514	28.6923	0.32526	0.0250971	0.0211073	0.245602
A3GALT2P	Inverse variance weighted	7	0.0175273	0.107408	1.01768	0.824488	1.25614	0.870374	3.19508	0.783994	0.0337125	0.0239203	0.217782
A4GALT	Inverse variance weighted	24	-0.126749	0.058279	0.880955	0.785861	0.987556	0.0296406	25.1753	0.341309	-0.0102256	0.0225398	0.654511
AACS	Inverse variance weighted	8	0.268675	0.17554	1.30823	0.927388	1.84547	0.125878	13.3296	0.0644729	-0.0466134	0.0430366	0.320355
AAGAB	Inverse variance weighted	42	0.00858895	0.0415508	1.00863	0.92974	1.09421	0.836237	50.1325	0.155171	-0.0188758	0.0170777	0.275637
AAMDC	Inverse variance weighted	4	0.0206402	0.0925412	1.02085	0.851513	1.22387	0.823506	6.82122	0.0778197	-0.054394	0.0852784	0.588861
AANAT	Inverse variance weighted	3	0.0193933	0.150501	1.01958	0.759125	1.3694	0.89747	0.359364	0.835536	0.0162705	0.0454573	0.78118
AAR2	Inverse variance weighted	9	-0.117398	0.0692181	0.889231	0.776417	1.01844	0.0898743	4.48666	0.810766	-0.01662	0.029257	0.58774
AARS	Inverse variance weighted	7	-0.0816657	0.157971	0.92158	0.676185	1.25603	0.60518	5.17994	0.520951	-0.010757	0.0327917	0.756173
AASDH	Inverse variance weighted	30	0.0101238	0.0466934	1.01018	0.921829	1.10699	0.828353	20.6762	0.87067	0.0239202	0.0187578	0.212714
AASDHPPT	Inverse variance weighted	5	0.233253	0.142649	1.2627	0.954718	1.67004	0.102017	3.78838	0.435402	-0.00926791	0.0548695	0.876615
AASS	Inverse variance weighted	16	0.1273	0.0883712	1.13576	0.955131	1.35054	0.149721	9.22871	0.865258	0.00225183	0.0210871	0.916473
AATF	Inverse variance weighted	7	-0.270819	0.151262	0.762754	0.567059	1.02599	0.0733891	3.20978	0.782094	0.0469015	0.051059	0.400461
AATK	Inverse variance weighted	36	0.0645154	0.0376064	1.06664	0.990849	1.14823	0.0862461	31.3734	0.643906	0.000982139	0.0162208	0.952074
ABAT	Inverse variance weighted	44	-0.112022	0.0577978	0.894025	0.798272	1.00126	0.0526032	69.0744	0.00704599	0.0179323	0.0188752	0.347525
ABCA1	Inverse variance weighted	20	0.269435	0.119788	1.30922	1.03526	1.65569	0.0244952	27.5759	0.0919367	-0.010347	0.0392016	0.794821
ABCA10	Inverse variance weighted	4	-0.267971	0.143171	0.76493	0.577766	1.01272	0.0612504	1.80148	0.614613	-0.0055824	0.0552431	0.928728
ABCA13	Inverse variance weighted	3	-0.00972012	0.340355	0.990327	0.508233	1.92972	0.977216	1.52722	0.465982	-0.0863997	0.115159	0.590227
ABCA2	Inverse variance weighted	21	0.14203	0.0613216	1.15261	1.02208	1.29981	0.0205501	15.2105	0.764238	-0.0177698	0.0227427	0.444228
ABCA3	Inverse variance weighted	6	0.181721	0.141693	1.19928	0.908466	1.58319	0.199669	1.85936	0.868242	0.00819554	0.0331985	0.817165
ABCA5	Inverse variance weighted	7	0.037168	0.212149	1.03787	0.684789	1.57299	0.860925	14.0264	0.0293431	0.00923696	0.0519093	0.865751
ABCA7	Inverse variance weighted	20	0.00573408	0.0677583	1.00575	0.88067	1.1486	0.932559	24.5087	0.177357	0.0458257	0.0186657	0.024485
ABCB1	Inverse variance weighted	5	-0.0804192	0.169912	0.922729	0.661367	1.28738	0.636	2.41485	0.659945	-0.0718726	0.0671733	0.363075
ABCB4	Inverse variance weighted	11	-0.0363865	0.115387	0.964268	0.769092	1.20897	0.752501	10.1897	0.42401	-0.00550066	0.0337651	0.874189
ABCB9	Inverse variance weighted	23	0.00803357	0.0852943	1.00807	0.852874	1.1915	0.924961	28.5093	0.15941	-0.019037	0.0247718	0.450751
ABCC1	Inverse variance weighted	14	0.030929	0.0970286	1.03141	0.852786	1.24745	0.749907	11.2949	0.586126	-0.0206229	0.0310556	0.519205
ABCC10	Inverse variance weighted	4	-0.00188213	0.260305	0.99812	0.599248	1.66249	0.994231	0.527627	0.912781	0.0102369	0.0893457	0.919247
ABCC13	Inverse variance weighted	19	0.0337724	0.0784068	1.03435	0.887005	1.20617	0.666662	15.4799	0.628794	-0.00381918	0.0238602	0.874717
ABCC2	Inverse variance weighted	10	0.209776	0.137481	1.2334	0.94206	1.61484	0.127046	2.41735	0.983024	0.00936137	0.047079	0.847345
ABCC3	Inverse variance weighted	64	-0.0240504	0.0316829	0.976237	0.917458	1.03878	0.447794	66.2075	0.366845	0.0129794	0.0125586	0.305381
ABCC4	Inverse variance weighted	40	0.00745972	0.0418194	1.00749	0.928202	1.09355	0.858425	28.025	0.904162	-0.000458742	0.0179692	0.979766
ABCC5	Inverse variance weighted	73	-0.0666463	0.0289685	0.935526	0.883888	0.99018	0.0214116	78.8327	0.271766	-0.00957147	0.01223	0.436453
ABCC6	Inverse variance weighted	9	0.32659	0.121115	1.38623	1.0933	1.75765	0.00700668	1.95338	0.982408	0.0147576	0.0258098	0.585354
ABCD2	Inverse variance weighted	9	-0.0963009	0.137085	0.908191	0.694206	1.18814	0.482372	5.64267	0.687187	0.0209655	0.0268289	0.460145
ABCD3	Inverse variance weighted	35	0.0244589	0.0773302	1.02476	0.880638	1.19247	0.751781	53.0591	0.0197218	-0.00858313	0.0231423	0.713094
ABCF1	Inverse variance weighted	3	0.0136201	0.18294	1.01371	0.708261	1.4509	0.940651	1.63622	0.441265	0.0850827	0.0988005	0.547405
ABCF2	Inverse variance weighted	12	-0.0732506	0.105164	0.929368	0.756259	1.1421	0.486093	16.1944	0.134065	-0.0214069	0.0390443	0.595533
ABCF3	Inverse variance weighted	8	-0.0520925	0.198958	0.949241	0.642718	1.40195	0.793455	13.8981	0.0530236	-0.0525	0.0376357	0.212482
ABCG1	Inverse variance weighted	8	0.134786	0.176971	1.14429	0.808902	1.61874	0.446284	1.06086	0.993786	0.0114434	0.0370586	0.767921
ABCG2	Inverse variance weighted	20	-0.0723424	0.0804347	0.930212	0.794538	1.08905	0.368443	20.9387	0.340198	-0.00152313	0.0261924	0.954269
ABHD1	Inverse variance weighted	2	0.255237	0.654699	1.29077	0.357732	4.65735	0.696644	NA	NA	NA	NA	NA
ABHD10	Inverse variance weighted	9	0.0761128	0.137904	1.07908	0.823511	1.41397	0.580998	11.9194	0.154838	0.0485671	0.0277767	0.123867
ABHD11	Inverse variance weighted	28	-0.0117881	0.0480721	0.988281	0.899416	1.08593	0.806289	25.0477	0.571788	0.0212074	0.0178413	0.245315
ABHD12	Inverse variance weighted	17	-0.0578435	0.0893522	0.943798	0.792174	1.12444	0.517396	15.6477	0.47781	0.00695527	0.0243037	0.778654
ABHD12B	Inverse variance weighted	14	0.177012	0.0889435	1.19365	1.00269	1.42097	0.0465726	19.0049	0.122951	0.0252194	0.0300773	0.418147
ABHD13	Inverse variance weighted	2	0.486334	0.367622	1.62634	0.7912	3.34302	0.185862	NA	NA	NA	NA	NA
ABHD14A	Inverse variance weighted	4	-0.110232	0.276962	0.895626	0.520442	1.54128	0.690626	2.56011	0.464525	0.0259135	0.0527049	0.671616
ABHD14B	Inverse variance weighted	11	-0.105581	0.152852	0.899801	0.666862	1.21411	0.489728	21.8904	0.0156729	-0.0438508	0.0431078	0.335606
ABHD15	Inverse variance weighted	27	0.0769953	0.06047	1.08004	0.959325	1.21594	0.202918	34.4708	0.123575	0.0080319	0.0241041	0.741749
ABHD16B	Inverse variance weighted	2	0.0486849	0.196605	1.04989	0.714151	1.54347	0.804422	NA	NA	NA	NA	NA
ABHD2	Inverse variance weighted	10	-0.0190952	0.09346	0.981086	0.816869	1.17832	0.838108	4.71412	0.858483	0.0224445	0.0405982	0.595475
ABHD3	Inverse variance weighted	6	-0.0311205	0.129931	0.969359	0.751424	1.2505	0.810706	3.59153	0.609585	-0.0109385	0.0485563	0.832807
ABHD4	Inverse variance weighted	5	0.0998216	0.153397	1.10497	0.818046	1.49254	0.515215	0.564314	0.966945	0.0331153	0.0463012	0.526113
ABHD5	Inverse variance weighted	10	-0.387805	0.170963	0.678545	0.485347	0.948648	0.0233073	15.7019	0.0733746	0.0306941	0.0456066	0.5199
ABHD6	Inverse variance weighted	6	0.142172	0.194585	1.15277	0.787246	1.68802	0.464998	7.9358	0.159809	0.0653147	0.0618984	0.350854
ABHD8	Inverse variance weighted	10	-0.203941	0.124471	0.81551	0.638966	1.04083	0.101324	3.2318	0.954391	-0.0367243	0.0312886	0.274261
ABI1	Inverse variance weighted	11	0.194497	0.122471	1.2147	0.955476	1.54425	0.112262	5.41922	0.861474	0.00534464	0.0230341	0.821703
ABI3BP	Inverse variance weighted	2	-0.421924	0.330557	0.655784	0.343072	1.25353	0.201812	NA	NA	NA	NA	NA
ABL2	Inverse variance weighted	4	-0.0183816	0.201582	0.981786	0.661343	1.4575	0.927344	0.195302	0.978344	0.00318162	0.0352707	0.936344
ABLIM1	Inverse variance weighted	6	0.0284803	0.18751	1.02889	0.712455	1.48587	0.879276	1.40095	0.924209	-0.0114473	0.0514143	0.834716
ABLIM3	Inverse variance weighted	2	0.697148	0.412806	2.00802	0.894087	4.50978	0.0912575	NA	NA	NA	NA	NA
ABO	Inverse variance weighted	36	0.0649265	0.0327388	1.06708	1.00076	1.1378	0.047349	51.4779	0.0357885	-0.0062465	0.0156191	0.691712
ABP1	Inverse variance weighted	60	-0.00370815	0.034244	0.996299	0.931624	1.06546	0.913769	39.9837	0.972655	-0.014029	0.0124595	0.264817
ABR	Inverse variance weighted	18	0.108856	0.0745063	1.115	0.963506	1.29032	0.144009	16.1865	0.510655	-7.74436e-05	0.0255584	0.99762
ABRACL	Inverse variance weighted	48	-0.00635434	0.0321363	0.993666	0.933008	1.05827	0.843256	43.8556	0.603581	-0.00533322	0.0123792	0.66861
ABT1	Inverse variance weighted	14	0.283241	0.102265	1.32742	1.08633	1.62203	0.00561133	10.5035	0.652333	-0.00235409	0.0204574	0.910291
ABTB1	Inverse variance weighted	38	0.00170668	0.0436987	1.00171	0.919484	1.09129	0.968846	22.461	0.971395	-0.00819797	0.013783	0.555705
ABTB2	Inverse variance weighted	15	-0.0304227	0.0934488	0.970035	0.807686	1.16502	0.744761	9.92664	0.767527	-0.011878	0.023951	0.628223
AC000068.5	Inverse variance weighted	2	0.0832121	0.102619	1.08677	0.888766	1.32889	0.417434	NA	NA	NA	NA	NA
AC000078.5	Inverse variance weighted	17	-0.0168599	0.0341043	0.983281	0.919703	1.05125	0.621049	8.16221	0.94389	-0.0158821	0.0239938	0.518059
AC000123.4	Inverse variance weighted	2	0.0972648	0.10879	1.10215	0.890508	1.3641	0.37129	NA	NA	NA	NA	NA
AC002306.1	Inverse variance weighted	2	-0.148493	0.188835	0.862006	0.595348	1.2481	0.431655	NA	NA	NA	NA	NA
AC002310.12	Inverse variance weighted	9	0.00334715	0.0390145	1.00335	0.929488	1.08309	0.931631	5.2148	0.73439	0.0445667	0.0273524	0.147261
AC002398.11	Inverse variance weighted	2	0.132963	0.212916	1.14221	0.752501	1.73373	0.53231	NA	NA	NA	NA	NA
AC002456.2	Inverse variance weighted	6	-0.00239762	0.0681928	0.997605	0.872794	1.14026	0.971953	2.37288	0.795506	-0.0298529	0.0359089	0.452523
AC002467.7	Inverse variance weighted	54	0.000304358	0.0272646	1.0003	0.948253	1.05521	0.991093	60.333	0.227861	0.022516	0.0131101	0.0918464
AC002480.3	Inverse variance weighted	3	-0.0291748	0.10352	0.971247	0.792888	1.18973	0.778075	0.0884865	0.956721	0.00243674	0.173164	0.991042
AC002511.1	Inverse variance weighted	2	-0.0313864	0.217521	0.969101	0.63272	1.48432	0.88527	NA	NA	NA	NA	NA
AC002511.2	Inverse variance weighted	5	-0.0332602	0.073399	0.967287	0.837677	1.11695	0.650447	3.96483	0.410787	-0.150774	0.119472	0.296141
AC003075.4	Inverse variance weighted	9	-0.0116766	0.124882	0.988391	0.773797	1.2625	0.925506	9.78459	0.280472	0.0618794	0.0437059	0.199749
AC004017.1	Inverse variance weighted	4	0.0291649	0.0960763	1.02959	0.852873	1.24293	0.761464	3.536	0.316123	-0.074192	0.0590807	0.336022
AC004152.6	Inverse variance weighted	4	0.0121093	0.136649	1.01218	0.774357	1.32305	0.929387	9.35711	0.0249011	-0.107994	0.0775559	0.298391
AC004166.6	Inverse variance weighted	8	-0.0711078	0.0471429	0.931361	0.84916	1.02152	0.131466	1.39061	0.985857	0.00572837	0.0296325	0.853091
AC004166.7	Inverse variance weighted	19	0.00730368	0.0374532	1.00733	0.936033	1.08406	0.845387	9.23971	0.953928	-0.0245022	0.0343988	0.485941
AC004231.2	Inverse variance weighted	14	-0.113109	0.035927	0.893054	0.832331	0.958207	0.00164229	9.54592	0.730577	-0.0300841	0.0285151	0.312193
AC004381.6	Inverse variance weighted	2	-0.31443	0.329933	0.730205	0.382473	1.39408	0.340583	NA	NA	NA	NA	NA
AC004540.5	Inverse variance weighted	3	-0.0181727	0.0923893	0.981991	0.81934	1.17693	0.844064	1.13766	0.566188	-0.0783222	0.0961895	0.564953
AC004696.2	Inverse variance weighted	8	-0.145389	0.0799137	0.864686	0.739324	1.01131	0.0688621	8.40538	0.298207	0.00394836	0.0615151	0.950908
AC004791.2	Inverse variance weighted	47	-0.103882	0.032754	0.901332	0.845287	0.961093	0.00151612	65.1367	0.0330131	-0.0283311	0.0158666	0.0809083
AC004824.2	Inverse variance weighted	21	0.0512021	0.0263356	1.05254	0.999584	1.10829	0.0518696	9.93985	0.969249	0.0108387	0.0267681	0.690065
AC004840.9	Inverse variance weighted	19	0.0357476	0.0269141	1.03639	0.98314	1.09253	0.184108	15.4183	0.633076	-0.00874894	0.0211536	0.684344
AC004893.10	Inverse variance weighted	5	-0.159546	0.0659913	0.852531	0.749095	0.970249	0.0156197	0.781026	0.940974	0.0292378	0.0400623	0.51833
AC004893.11	Inverse variance weighted	7	-0.183496	0.0879276	0.832355	0.700589	0.988904	0.036897	7.68112	0.262408	-0.00393839	0.0452991	0.934092
AC004951.5	Inverse variance weighted	6	-0.0492669	0.0486501	0.951927	0.86535	1.04717	0.311213	5.06039	0.408555	0.0595868	0.0342336	0.156729
AC004967.7	Inverse variance weighted	2	0.142064	0.139589	1.15265	0.876752	1.51537	0.308808	NA	NA	NA	NA	NA
AC004967.8	Inverse variance weighted	8	0.0603019	0.0639186	1.06216	0.937088	1.20392	0.345467	0.892366	0.996383	0.0214331	0.053811	0.704194
AC004980.7	Inverse variance weighted	3	-0.494429	0.37774	0.609919	0.290893	1.27883	0.190564	6.72475	0.0346529	-0.0353935	0.260475	0.914023
AC004985.12	Inverse variance weighted	7	-0.107705	0.0608633	0.897892	0.796923	1.01165	0.0767894	7.37889	0.287224	-0.0725172	0.0560738	0.25245
AC005041.17	Inverse variance weighted	6	-0.110104	0.045253	0.895741	0.819714	0.97882	0.0149715	3.9735	0.553237	-0.0983374	0.099642	0.379559
AC005077.14	Inverse variance weighted	37	0.00160163	0.0203077	1.0016	0.962519	1.04227	0.937137	40.8311	0.266467	-0.00366215	0.0177197	0.837464
AC005082.12	Inverse variance weighted	21	-0.0101264	0.0231644	0.989925	0.945985	1.03591	0.662001	15.8562	0.725504	0.0346639	0.0165518	0.0498769
AC005104.3	Inverse variance weighted	4	-0.0490497	0.0872602	0.952134	0.802455	1.12973	0.574042	1.81881	0.610849	0.0064211	0.0500166	0.909594
AC005154.6	Inverse variance weighted	27	-0.00641055	0.0252651	0.99361	0.945605	1.04405	0.799703	33.9308	0.136775	0.0254569	0.0179073	0.1675
AC005154.7	Inverse variance weighted	7	-0.000312728	0.090131	0.999687	0.837805	1.19285	0.997232	7.997	0.238323	-0.0531967	0.0458715	0.298539
AC005154.8	Inverse variance weighted	22	0.0320026	0.030752	1.03252	0.972125	1.09667	0.298031	36.5528	0.0189359	0.0282261	0.0222343	0.218843
AC005224.2	Inverse variance weighted	7	0.0314956	0.0879986	1.032	0.868505	1.22626	0.72041	5.32106	0.503342	-0.0251411	0.0383567	0.541128
AC005253.2	Inverse variance weighted	2	-0.0374787	0.107796	0.963215	0.779767	1.18982	0.72808	NA	NA	NA	NA	NA
AC005255.3	Inverse variance weighted	2	0.151259	0.225148	1.1633	0.74824	1.80859	0.501699	NA	NA	NA	NA	NA
AC005264.2	Inverse variance weighted	5	0.171617	0.0947509	1.18722	0.986004	1.42951	0.0701033	5.53091	0.237026	0.0855506	0.0512066	0.193375
AC005306.3	Inverse variance weighted	7	-0.159	0.0459347	0.852996	0.779555	0.933357	0.000537298	3.55829	0.736199	-0.0981274	0.0661557	0.198111
AC005307.3	Inverse variance weighted	3	0.0721047	0.473595	1.07477	0.424798	2.71924	0.87899	4.12117	0.12738	0.358499	0.200478	0.324606
AC005391.3	Inverse variance weighted	2	-0.0200484	0.0752946	0.980151	0.84567	1.13602	0.790035	NA	NA	NA	NA	NA
AC005488.1	Inverse variance weighted	35	0.0381198	0.0231853	1.03886	0.992703	1.08715	0.100147	36.1978	0.366356	-0.0217158	0.01644	0.195616
AC005532.5	Inverse variance weighted	12	-0.0237917	0.0402045	0.976489	0.902495	1.05655	0.554006	7.88407	0.72365	0.00320637	0.0254019	0.902055
AC005534.9	Inverse variance weighted	4	0.0532152	0.0962773	1.05466	0.873289	1.27369	0.580449	0.709297	0.871015	-0.0217909	0.192984	0.92041
AC005562.1	Inverse variance weighted	3	-0.218181	0.229263	0.80398	0.512971	1.26008	0.341267	4.47967	0.106476	0.00333767	0.138002	0.984606
AC005682.5	Inverse variance weighted	17	-0.0189196	0.0360693	0.981258	0.914283	1.05314	0.599906	12.3045	0.722769	-0.0277182	0.0306421	0.379988
AC005682.6	Inverse variance weighted	15	-0.0285693	0.0389792	0.971835	0.900353	1.04899	0.463597	9.77104	0.778724	0.00249464	0.0338977	0.942454
AC005789.11	Inverse variance weighted	3	-0.130424	0.183611	0.877723	0.612441	1.25791	0.477502	6.77017	0.0338748	-0.152523	0.0609513	0.24203
AC005795.2	Inverse variance weighted	2	-0.146013	0.108756	0.864147	0.698252	1.06946	0.179411	NA	NA	NA	NA	NA
AC005841.1	Inverse variance weighted	2	0.160376	0.121261	1.17395	0.925616	1.48892	0.18598	NA	NA	NA	NA	NA
AC006026.13	Inverse variance weighted	28	0.0586905	0.0266107	1.06045	1.00655	1.11722	0.0274175	27.5058	0.436778	-0.00884372	0.0174998	0.617563
AC006042.6	Inverse variance weighted	3	0.120771	0.131253	1.12837	0.872419	1.4594	0.357501	0.981732	0.612096	0.000237374	0.118017	0.99872
AC006129.1	Inverse variance weighted	2	0.0973917	0.189652	1.10229	0.760084	1.59857	0.607582	NA	NA	NA	NA	NA
AC006129.2	Inverse variance weighted	6	-0.154142	0.144879	0.85715	0.645258	1.13862	0.287358	22.0629	0.00050938	0.0168637	0.0968657	0.870248
AC006129.4	Inverse variance weighted	11	0.00955104	0.0562925	1.0096	0.90413	1.12737	0.865271	13.6303	0.190534	0.0763094	0.0325549	0.0437313
AC006160.5	Inverse variance weighted	2	-0.112662	0.119847	0.893453	0.706408	1.13002	0.347192	NA	NA	NA	NA	NA
AC006369.2	Inverse variance weighted	27	-0.0606813	0.0282001	0.941123	0.890517	0.994606	0.0314124	30.5052	0.247213	0.00731602	0.022255	0.745093
AC006465.3	Inverse variance weighted	10	-0.109068	0.14284	0.896669	0.677711	1.18637	0.445123	9.15349	0.423229	0.0204137	0.0303218	0.519769
AC006538.1	Inverse variance weighted	10	-0.186003	0.0399211	0.830271	0.767783	0.897845	3.17318e-06	8.6022	0.474774	-0.0398961	0.0284358	0.198208
AC006547.13	Inverse variance weighted	7	0.0191916	0.062468	1.01938	0.901905	1.15215	0.758674	4.39681	0.623141	0.0194761	0.0457714	0.688159
AC006547.14	Inverse variance weighted	5	-0.0104812	0.0656489	0.989574	0.870095	1.12546	0.873153	1.6842	0.793586	0.0274459	0.0632571	0.693685
AC006946.15	Inverse variance weighted	11	0.128045	0.0625898	1.1366	1.00538	1.28495	0.0407774	2.66261	0.988288	-0.0307392	0.0364378	0.420744
AC006978.6	Inverse variance weighted	6	-0.0710333	0.148286	0.931431	0.696509	1.24559	0.631919	6.45422	0.264494	0.00591123	0.050236	0.912002
AC007000.12	Inverse variance weighted	5	0.00377165	0.0689736	1.00378	0.876852	1.14908	0.956391	1.40836	0.842742	0.0241755	0.0441654	0.622207
AC007036.6	Inverse variance weighted	2	-0.0692856	0.11042	0.93306	0.751481	1.15851	0.530351	NA	NA	NA	NA	NA
AC007038.7	Inverse variance weighted	2	-0.0317831	0.141381	0.968717	0.734261	1.27804	0.822132	NA	NA	NA	NA	NA
AC007228.11	Inverse variance weighted	12	0.00243443	0.0450112	1.00244	0.917789	1.09489	0.956868	11.4579	0.405733	-0.0155217	0.0243346	0.537906
AC007246.3	Inverse variance weighted	2	-0.196571	0.109034	0.821543	0.663465	1.01728	0.0714135	NA	NA	NA	NA	NA
AC007278.2	Inverse variance weighted	23	0.0547164	0.0314508	1.05624	0.993097	1.1234	0.0819042	13.5496	0.91669	0.0254526	0.0235384	0.291815
AC007278.3	Inverse variance weighted	62	0.0304188	0.0176363	1.03089	0.99586	1.06714	0.0845668	62.6015	0.419172	0.0130187	0.0135142	0.339247
AC007283.5	Inverse variance weighted	7	-0.0376198	0.0731385	0.963079	0.834459	1.11152	0.606997	2.77927	0.835997	-0.0150916	0.0488182	0.769683
AC007292.6	Inverse variance weighted	5	-0.300607	0.111458	0.740368	0.595077	0.921134	0.00699583	0.980641	0.912717	-0.00099319	0.0431073	0.983065
AC007390.5	Inverse variance weighted	18	0.0194383	0.0408692	1.01963	0.941138	1.10466	0.634344	11.7814	0.813188	0.0436066	0.0244834	0.0938926
AC007390.6	Inverse variance weighted	2	-0.0736283	0.177098	0.929017	0.656561	1.31454	0.677594	NA	NA	NA	NA	NA
AC007395.4	Inverse variance weighted	16	-0.112106	0.031999	0.89395	0.839605	0.951812	0.000459328	6.86472	0.961295	-0.00452669	0.0210377	0.832737
AC007401.2	Inverse variance weighted	4	-0.200742	0.0831628	0.818123	0.695071	0.96296	0.0157851	3.98188	0.263428	-0.0503535	0.0751999	0.572068
AC007773.2	Inverse variance weighted	4	-0.0347387	0.0661676	0.965858	0.84838	1.0996	0.599576	2.35536	0.501998	-0.0898676	0.0707986	0.332039
AC007879.2	Inverse variance weighted	2	0.277777	0.170757	1.32019	0.944683	1.84496	0.103791	NA	NA	NA	NA	NA
AC007879.5	Inverse variance weighted	3	0.107374	0.159419	1.11335	0.814577	1.52171	0.500609	2.35874	0.307473	-0.0388644	0.101217	0.766607
AC007879.7	Inverse variance weighted	3	0.0674435	0.112006	1.06977	0.858912	1.33239	0.54708	1.80633	0.405284	0.0581355	0.0878042	0.627681
AC007880.1	Inverse variance weighted	6	-0.114897	0.0819996	0.891458	0.759104	1.04689	0.161157	4.58796	0.468202	0.00528999	0.050236	0.921205
AC007950.1	Inverse variance weighted	5	0.111866	0.182004	1.11836	0.782812	1.59775	0.538797	2.86572	0.580542	-0.0157208	0.0500409	0.77398
AC007952.5	Inverse variance weighted	13	0.0276557	0.0372992	1.02804	0.955567	1.10601	0.458417	18.1496	0.111224	-0.0167753	0.0264604	0.539054
AC008074.3	Inverse variance weighted	13	-0.0144285	0.0432436	0.985675	0.905574	1.07286	0.738638	16.7634	0.158717	-0.0344982	0.0218516	0.142699
AC008074.5	Inverse variance weighted	6	0.0052527	0.0559969	1.00527	0.900774	1.12188	0.925265	4.61046	0.465242	-0.0254787	0.0303187	0.448003
AC008268.2	Inverse variance weighted	17	-0.0274101	0.0375444	0.972962	0.903936	1.04726	0.465347	15.0855	0.518383	-0.0146333	0.0328661	0.662504
AC008280.5	Inverse variance weighted	4	-0.0183826	0.042214	0.981785	0.903823	1.06647	0.663228	1.81984	0.610627	0.0577902	0.110919	0.654304
AC008537.1	Inverse variance weighted	3	-0.237774	0.115803	0.78838	0.628293	0.989258	0.0400469	1.23809	0.538458	0.0878285	0.0793545	0.467759
AC008592.3	Inverse variance weighted	12	-0.112485	0.0586177	0.893611	0.796622	1.00241	0.0549902	17.0974	0.105027	0.012444	0.0281823	0.668208
AC008592.4	Inverse variance weighted	5	-0.040584	0.101435	0.960228	0.787103	1.17143	0.689084	7.32545	0.119657	0.0714444	0.0399237	0.17147
AC008746.12	Inverse variance weighted	22	0.0157089	0.027873	1.01583	0.961826	1.07287	0.573034	26.6265	0.18356	0.0108798	0.0211805	0.61311
AC008753.4	Inverse variance weighted	2	-0.225237	0.282235	0.798327	0.459132	1.38811	0.424842	NA	NA	NA	NA	NA
AC008984.2	Inverse variance weighted	10	0.0362666	0.0519884	1.03693	0.936477	1.14816	0.485433	6.03917	0.735992	0.0204672	0.0285657	0.494068
AC008984.7	Inverse variance weighted	8	-0.0342285	0.0449539	0.966351	0.884849	1.05536	0.44641	4.1068	0.767397	-0.00432919	0.0270595	0.878141
AC008993.5	Inverse variance weighted	2	0.0612761	0.137279	1.06319	0.812376	1.39145	0.655337	NA	NA	NA	NA	NA
AC009005.2	Inverse variance weighted	11	0.0222213	0.03906	1.02247	0.947114	1.10382	0.569423	16.5462	0.0850282	0.00250787	0.0299595	0.93512
AC009093.1	Inverse variance weighted	2	0.0518105	0.115277	1.05318	0.840185	1.32016	0.653112	NA	NA	NA	NA	NA
AC009299.3	Inverse variance weighted	36	-0.0415878	0.0238617	0.959265	0.915434	1.00519	0.081357	28.1593	0.787206	0.0249641	0.0208624	0.239738
AC009403.2	Inverse variance weighted	3	-0.142422	0.111871	0.867255	0.6965	1.07987	0.202985	3.11105	0.211078	0.030372	0.338587	0.943046
AC009404.2	Inverse variance weighted	7	0.0599584	0.136744	1.06179	0.812158	1.38816	0.661045	6.62477	0.356945	-0.00650239	0.0610947	0.919378
AC009495.2	Inverse variance weighted	18	-0.00628625	0.0424436	0.993733	0.91441	1.07994	0.882257	14.8533	0.606048	-0.0119049	0.0222165	0.599428
AC009506.1	Inverse variance weighted	43	0.0136964	0.0229788	1.01379	0.969144	1.06049	0.551146	48.0246	0.241873	0.00121741	0.0154183	0.937449
AC009784.3	Inverse variance weighted	3	0.0142908	0.247281	1.01439	0.624765	1.64701	0.953915	2.00516	0.366932	0.0152063	0.102615	0.906342
AC009948.5	Inverse variance weighted	2	-0.149625	0.135387	0.861031	0.660352	1.1227	0.269085	NA	NA	NA	NA	NA
AC009950.2	Inverse variance weighted	2	0.215008	0.222004	1.23987	0.802423	1.9158	0.332801	NA	NA	NA	NA	NA
AC009961.3	Inverse variance weighted	12	0.0567772	0.0447466	1.05842	0.969547	1.15544	0.204491	15.3642	0.166422	0.0275414	0.0212219	0.223498
AC010150.1	Inverse variance weighted	3	-0.10144	0.123845	0.903536	0.708804	1.15177	0.412739	4.2778	0.117784	-0.0757548	0.17588	0.741084
AC010492.2	Inverse variance weighted	8	-0.141531	0.074591	0.868028	0.749964	1.00468	0.0577709	1.94883	0.962618	-0.012935	0.0352514	0.726261
AC010536.1	Inverse variance weighted	8	0.0756614	0.0627526	1.0786	0.953769	1.21976	0.227929	7.96304	0.335865	0.0460554	0.0366316	0.255382
AC010642.1	Inverse variance weighted	3	0.132863	0.190543	1.14209	0.786155	1.65919	0.485623	10.2646	0.00590287	0.142335	0.0448628	0.194382
AC010878.3	Inverse variance weighted	11	0.0256685	0.082535	1.026	0.872755	1.20615	0.755799	19.6003	0.033268	-0.0147924	0.070149	0.837685
AC010883.5	Inverse variance weighted	5	-0.152715	0.072403	0.858375	0.744811	0.989253	0.0349244	3.90343	0.419233	-0.00205394	0.0600473	0.974862
AC010976.2	Inverse variance weighted	2	-0.079809	0.219866	0.923293	0.600047	1.42067	0.716613	NA	NA	NA	NA	NA
AC010982.1	Inverse variance weighted	42	-0.0719929	0.0396415	0.930538	0.860975	1.00572	0.0693555	35.6174	0.70818	0.00602099	0.0134188	0.656071
AC011515.2	Inverse variance weighted	2	0.128545	0.156272	1.13717	0.837153	1.54471	0.410751	NA	NA	NA	NA	NA
AC011747.4	Inverse variance weighted	8	0.0372168	0.0477502	1.03792	0.945186	1.13975	0.43574	3.90579	0.790562	0.0462472	0.0270907	0.138669
AC011816.1	Inverse variance weighted	21	-0.0141496	0.0340922	0.98595	0.922221	1.05408	0.678114	13.2706	0.865472	0.0389129	0.0260099	0.151059
AC011893.3	Inverse variance weighted	29	-0.0765599	0.0307477	0.926297	0.872123	0.983838	0.0127766	38.318	0.0925327	-0.0162648	0.0162699	0.32634
AC011899.9	Inverse variance weighted	13	0.0739601	0.0519384	1.07676	0.972545	1.19215	0.154447	16.6314	0.163998	-0.0366632	0.0260344	0.186685
AC012065.7	Inverse variance weighted	13	0.0498743	0.0542243	1.05114	0.945156	1.16901	0.357689	6.26198	0.902304	-0.0416188	0.0269747	0.151122
AC012146.7	Inverse variance weighted	33	-0.0507803	0.0405858	0.950487	0.877807	1.02919	0.210868	30.5033	0.542329	-0.00680675	0.0148799	0.650541
AC012307.3	Inverse variance weighted	2	0.0404794	0.491495	1.04131	0.397385	2.72866	0.934361	NA	NA	NA	NA	NA
AC012309.5	Inverse variance weighted	19	-0.00044298	0.0368229	0.999557	0.929958	1.07437	0.990402	19.2237	0.378174	-0.00700838	0.0373897	0.853533
AC012314.20	Inverse variance weighted	3	0.0863386	0.0993032	1.09018	0.897362	1.32442	0.384604	1.98006	0.371566	0.131841	0.0947161	0.396599
AC012358.4	Inverse variance weighted	3	0.136032	0.221714	1.14572	0.74191	1.76932	0.539514	3.8305	0.147305	-0.135749	0.0705621	0.30517
AC012363.7	Inverse variance weighted	2	-0.139717	0.123282	0.869605	0.682939	1.10729	0.257085	NA	NA	NA	NA	NA
AC012442.5	Inverse variance weighted	3	-0.0538577	0.15942	0.947567	0.693281	1.29512	0.735487	0.515605	0.772748	-0.042047	0.0684557	0.649342
AC012454.4	Inverse variance weighted	22	0.0337631	0.0249956	1.03434	0.984887	1.08628	0.176772	23.5398	0.315887	-0.0122702	0.0216238	0.576732
AC013264.2	Inverse variance weighted	35	-0.0112271	0.0195917	0.988836	0.951584	1.02755	0.566606	31.568	0.587382	-0.0151009	0.0204365	0.465178
AC013400.2	Inverse variance weighted	8	0.29327	0.127143	1.34081	1.04505	1.72025	0.0210766	1.50055	0.982291	0.00822887	0.03819	0.836537
AC013437.6	Inverse variance weighted	12	0.025177	0.0662438	1.0255	0.90063	1.16768	0.703897	18.0619	0.0801564	-0.0384084	0.0363682	0.31577
AC016683.6	Inverse variance weighted	56	0.0412453	0.0243532	1.04211	0.993534	1.09306	0.0903355	42.5847	0.889122	-0.00109634	0.0125701	0.930821
AC016722.2	Inverse variance weighted	3	-0.162183	0.297693	0.850286	0.47442	1.52394	0.585892	2.94649	0.229181	-0.0525732	0.126359	0.748996
AC016725.4	Inverse variance weighted	2	0.340577	0.189469	1.40576	0.969687	2.03794	0.0722509	NA	NA	NA	NA	NA
AC016735.1	Inverse variance weighted	4	0.0428578	0.220208	1.04379	0.677904	1.60715	0.845687	10.8426	0.0126079	-0.251011	0.153998	0.244673
AC016735.2	Inverse variance weighted	11	-0.0952117	0.0986547	0.90918	0.749331	1.10313	0.334495	23.9146	0.0078302	-0.0343436	0.0720397	0.644916
AC016747.3	Inverse variance weighted	19	0.086133	0.0481628	1.08995	0.991768	1.19785	0.0737162	14.9704	0.664002	-0.0115332	0.0260981	0.664118
AC016753.7	Inverse variance weighted	19	-0.00258381	0.0342779	0.99742	0.93261	1.06673	0.939914	12.1653	0.838586	0.00917194	0.0194751	0.643657
AC016757.3	Inverse variance weighted	26	0.0741147	0.0461357	1.07693	0.983821	1.17885	0.108175	18.0025	0.842286	0.00136422	0.0172635	0.937669
AC016773.1	Inverse variance weighted	32	0.062978	0.0248342	1.065	1.01441	1.11812	0.0112145	27.3754	0.653193	0.00487872	0.0231931	0.834815
AC016831.7	Inverse variance weighted	2	-0.030332	0.122177	0.970123	0.763533	1.23261	0.803931	NA	NA	NA	NA	NA
AC017074.2	Inverse variance weighted	8	-0.0436302	0.0540528	0.957308	0.861075	1.0643	0.419565	4.54389	0.715426	0.00731721	0.0401337	0.861335
AC017076.5	Inverse variance weighted	4	-0.0377098	0.0453701	0.962992	0.881055	1.05255	0.405883	2.42735	0.488564	0.0371864	0.0286765	0.324164
AC017099.3	Inverse variance weighted	37	0.10204	0.0373836	1.10743	1.02919	1.19162	0.00634217	32.36	0.642446	-0.0181584	0.0183332	0.328745
AC017104.2	Inverse variance weighted	2	0.0291088	0.0854464	1.02954	0.87078	1.21724	0.733354	NA	NA	NA	NA	NA
AC017104.6	Inverse variance weighted	3	-0.0270122	0.10778	0.973349	0.787997	1.2023	0.802105	1.11084	0.57383	-0.036369	0.068831	0.690543
AC017116.8	Inverse variance weighted	8	0.118335	0.119818	1.12562	0.890022	1.42359	0.323337	10.2498	0.174856	0.0390173	0.0598827	0.538824
AC018633.4	Inverse variance weighted	24	0.0551094	0.0275421	1.05666	1.00113	1.11526	0.0454014	23.2702	0.445089	-0.00991956	0.0212923	0.645884
AC018638.1	Inverse variance weighted	7	0.00819181	0.0655383	1.00823	0.886687	1.14642	0.900529	1.77918	0.938846	0.00824789	0.0384698	0.838705
AC018642.1	Inverse variance weighted	3	0.177614	0.130887	1.19436	0.924109	1.54366	0.174781	2.41146	0.299473	-0.0896885	0.0589803	0.370327
AC018720.10	Inverse variance weighted	13	0.0271805	0.0399271	1.02755	0.950206	1.1112	0.496027	4.01366	0.983189	0.00867343	0.0292246	0.77216
AC018755.11	Inverse variance weighted	2	0.215726	0.155154	1.24076	0.915417	1.68174	0.164407	NA	NA	NA	NA	NA
AC018755.15	Inverse variance weighted	4	-0.00748666	0.0981134	0.992541	0.818904	1.203	0.939175	0.11751	0.989656	0.009902	0.0890462	0.921611
AC018755.16	Inverse variance weighted	31	-0.0382167	0.035567	0.962504	0.897692	1.032	0.282599	22.087	0.850862	0.0085653	0.0162884	0.602989
AC018766.4	Inverse variance weighted	2	-0.165839	0.0989774	0.847183	0.697792	1.02856	0.093832	NA	NA	NA	NA	NA
AC018766.5	Inverse variance weighted	3	-0.140259	0.0811603	0.869133	0.741312	1.01899	0.0839566	0.0256308	0.987266	-0.00199048	0.0352569	0.964097
AC018766.6	Inverse variance weighted	2	0.153708	0.110892	1.16615	0.938343	1.44926	0.165713	NA	NA	NA	NA	NA
AC018804.6	Inverse variance weighted	8	0.057653	0.0560028	1.05935	0.949222	1.18225	0.30326	16.168	0.0236249	0.0352713	0.0388084	0.39846
AC018816.3	Inverse variance weighted	6	0.0430845	0.0611799	1.04403	0.926049	1.17703	0.481291	2.36166	0.79717	-0.0175253	0.0576412	0.776257
AC018890.6	Inverse variance weighted	5	-0.276835	0.0938459	0.75818	0.630796	0.911288	0.00317894	2.72919	0.604117	-0.0482912	0.0601385	0.480703
AC019048.1	Inverse variance weighted	2	0.174261	0.17667	1.19037	0.841969	1.68292	0.323955	NA	NA	NA	NA	NA
AC019097.7	Inverse variance weighted	5	0.0793271	0.0936202	1.08256	0.901073	1.3006	0.396812	7.56238	0.10899	0.0651968	0.0668501	0.401355
AC020571.3	Inverse variance weighted	2	0.188403	0.372178	1.20732	0.582127	2.50396	0.612705	NA	NA	NA	NA	NA
AC020910.2	Inverse variance weighted	3	0.657496	0.231574	1.92995	1.22582	3.03855	0.00452199	3.27548	0.194419	0.253348	0.146905	0.334527
AC020956.1	Inverse variance weighted	10	0.033599	0.0675049	1.03417	0.906005	1.18047	0.618676	8.32733	0.501525	-0.0385259	0.0297978	0.232128
AC020956.3	Inverse variance weighted	14	0.0739169	0.0445754	1.07672	0.986639	1.17502	0.0972681	12.2245	0.509324	-0.0254842	0.0343607	0.472554
AC021860.1	Inverse variance weighted	21	-0.0788954	0.0379032	0.924137	0.85797	0.995406	0.0373886	33.9207	0.0266664	-0.00882797	0.0304249	0.77484
AC022007.5	Inverse variance weighted	2	-0.0858928	1.05722	0.917693	0.11555	7.28827	0.935248	NA	NA	NA	NA	NA
AC022182.1	Inverse variance weighted	2	-0.0766504	0.17034	0.926214	0.663307	1.29332	0.652722	NA	NA	NA	NA	NA
AC022182.3	Inverse variance weighted	20	-0.0492758	0.0707415	0.951919	0.828673	1.09349	0.486077	25.3714	0.148678	-0.0586158	0.0219697	0.0156796
AC022431.2	Inverse variance weighted	21	0.0856934	0.0401075	1.08947	1.00711	1.17857	0.0326311	18.342	0.56489	-0.0119736	0.0223407	0.598208
AC022431.3	Inverse variance weighted	10	0.12442	0.076658	1.13249	0.974501	1.3161	0.104578	10.7912	0.290292	0.00576544	0.0529887	0.916037
AC022498.1	Inverse variance weighted	11	-0.167905	0.0800025	0.845434	0.722737	0.988961	0.0358386	5.44389	0.859625	0.0225863	0.0221201	0.333881
AC022532.1	Inverse variance weighted	5	-0.0405453	0.0652234	0.960266	0.84503	1.09122	0.53418	1.86188	0.761143	-0.00701643	0.0422696	0.878719
AC024560.3	Inverse variance weighted	11	0.0975749	0.0578482	1.10249	0.984317	1.23486	0.0916531	5.97359	0.817478	0.00110703	0.0266133	0.967728
AC024704.2	Inverse variance weighted	5	0.0736891	0.067619	1.07647	0.942854	1.22903	0.275815	2.8436	0.58433	-0.0219997	0.0557391	0.719458
AC024937.6	Inverse variance weighted	3	0.0682354	0.105019	1.07062	0.871445	1.31531	0.515859	0.938572	0.625449	-0.0855119	0.0882659	0.510088
AC025171.1	Inverse variance weighted	3	0.0313143	0.276918	1.03181	0.599629	1.77548	0.909966	0.875353	0.645535	-0.0342975	0.107043	0.802601
AC025335.1	Inverse variance weighted	7	-0.015512	0.0917032	0.984608	0.822629	1.17848	0.865675	6.51027	0.368516	-0.041885	0.0358825	0.29573
AC025627.9	Inverse variance weighted	10	0.0912315	0.0663722	1.09552	0.961887	1.24772	0.169273	14.0489	0.120596	-0.010564	0.0538221	0.849288
AC026740.1	Inverse variance weighted	5	-0.0205092	0.0783532	0.9797	0.840228	1.14232	0.793512	1.41427	0.841711	-0.0316609	0.0475841	0.553399
AC027319.1	Inverse variance weighted	3	-0.127166	0.112292	0.880587	0.706623	1.09738	0.25744	0.660881	0.718607	-0.0406097	0.0906509	0.731874
AC027763.2	Inverse variance weighted	5	-0.0409847	0.0620143	0.959844	0.849988	1.0839	0.508683	8.64234	0.0706882	-0.094213	0.0347415	0.0730516
AC034193.5	Inverse variance weighted	5	-0.186353	0.220789	0.82998	0.538429	1.2794	0.398649	5.36015	0.252299	-0.0124778	0.0546224	0.833992
AC034220.3	Inverse variance weighted	16	-0.0467848	0.0452752	0.954293	0.873258	1.04285	0.301444	27.6902	0.023591	-0.0312812	0.0398265	0.445287
AC034229.1	Inverse variance weighted	2	-0.259772	0.285833	0.771228	0.44043	1.35048	0.363443	NA	NA	NA	NA	NA
AC046143.7	Inverse variance weighted	3	-0.233161	0.106845	0.792026	0.642378	0.976535	0.0290922	0.134928	0.934761	0.0362788	0.112881	0.802035
AC051649.16	Inverse variance weighted	6	-0.0100921	0.0530954	0.989959	0.892116	1.09853	0.84925	5.06529	0.407964	0.0127946	0.042353	0.777636
AC058791.1	Inverse variance weighted	3	-0.0187747	0.219867	0.9814	0.637811	1.51008	0.93195	0.476621	0.787958	-0.0539648	0.0791308	0.618969
AC058791.2	Inverse variance weighted	9	0.00153263	0.0540654	1.00153	0.900833	1.11349	0.977385	8.11872	0.42196	0.0224131	0.0461981	0.642383
AC062017.1	Inverse variance weighted	15	-0.00273415	0.0894263	0.99727	0.836934	1.18832	0.975609	15.9131	0.318712	-0.0292292	0.0279374	0.314514
AC062029.1	Inverse variance weighted	2	0.21555	0.149527	1.24054	0.925406	1.663	0.149431	NA	NA	NA	NA	NA
AC068039.4	Inverse variance weighted	35	0.0865423	0.0282011	1.0904	1.03176	1.15237	0.00214951	38.4926	0.273382	-0.00444387	0.0152249	0.772204
AC068282.3	Inverse variance weighted	41	0.0408281	0.0187807	1.04167	1.00403	1.08073	0.0297101	31.3971	0.832713	8.19709e-05	0.0140564	0.995377
AC068491.1	Inverse variance weighted	18	0.0914465	0.0442594	1.09576	1.00471	1.19506	0.0388145	10.9134	0.861028	0.0106535	0.0301524	0.72846
AC068580.6	Inverse variance weighted	3	-0.0881223	0.140645	0.915649	0.695039	1.20628	0.53095	0.99886	0.606876	0.0232586	0.0541913	0.741903
AC068831.10	Inverse variance weighted	5	-0.121814	0.0905117	0.885313	0.741399	1.05716	0.178357	5.38679	0.249861	0.0123888	0.0737748	0.877323
AC068831.8	Inverse variance weighted	4	-0.0143408	0.123989	0.985762	0.773091	1.25694	0.90792	5.74577	0.124656	-0.11661	0.113278	0.411495
AC069213.1	Inverse variance weighted	14	0.175198	0.0965611	1.19148	0.986037	1.43973	0.0696194	8.13789	0.834502	-0.00295834	0.024181	0.904654
AC069278.4	Inverse variance weighted	3	-0.137351	0.21601	0.871664	0.570791	1.33113	0.524871	1.05193	0.590985	-0.0772764	0.0853997	0.531764
AC069282.6	Inverse variance weighted	5	0.105603	0.0630703	1.11138	0.982146	1.25762	0.0940581	3.49633	0.478437	0.0446069	0.0600395	0.511396
AC069363.1	Inverse variance weighted	3	0.0226621	0.0798683	1.02292	0.874695	1.19626	0.776607	1.6433	0.439705	0.076337	0.0630305	0.439401
AC069513.3	Inverse variance weighted	99	0.056441	0.0206008	1.05806	1.01619	1.10166	0.00614874	103.454	0.333588	0.000588154	0.00980132	0.952273
AC073043.2	Inverse variance weighted	32	0.0104098	0.0257108	1.01046	0.960805	1.06269	0.685565	25.7279	0.734255	0.00410366	0.0200941	0.83956
AC073052.1	Inverse variance weighted	2	-0.0485714	0.0905737	0.952589	0.797642	1.13764	0.591776	NA	NA	NA	NA	NA
AC073072.5	Inverse variance weighted	2	-0.199116	0.331318	0.819455	0.428057	1.56873	0.547853	NA	NA	NA	NA	NA
AC073115.6	Inverse variance weighted	8	-0.00863707	0.0719183	0.9914	0.861055	1.14148	0.904407	9.88803	0.195008	0.0250497	0.0440257	0.590017
AC073115.7	Inverse variance weighted	10	-0.0201528	0.0517563	0.980049	0.885507	1.08468	0.696996	5.23985	0.812919	0.009879	0.0334825	0.775468
AC073135.6	Inverse variance weighted	9	0.0381248	0.0500243	1.03886	0.941837	1.14588	0.445985	3.16536	0.923556	0.020825	0.0399976	0.618664
AC073343.11	Inverse variance weighted	9	-0.0445966	0.056334	0.956383	0.856406	1.06803	0.428567	4.89957	0.768255	-0.0481159	0.0421492	0.291178
AC073346.2	Inverse variance weighted	5	0.220177	0.0882224	1.2463	1.0484	1.48156	0.0125707	3.91208	0.418036	0.0927041	0.0523898	0.174953
AC073635.5	Inverse variance weighted	8	-0.0379183	0.0598267	0.962792	0.856262	1.08257	0.52621	4.12577	0.765183	-0.0172429	0.0415861	0.692828
AC074011.2	Inverse variance weighted	23	0.0236421	0.0275293	1.02392	0.97014	1.08069	0.390453	12.076	0.955789	0.0193158	0.0213472	0.375813
AC074286.1	Inverse variance weighted	7	-0.181304	0.142087	0.834182	0.631413	1.10207	0.201954	6.52216	0.367303	0.0602217	0.0374053	0.168317
AC074289.1	Inverse variance weighted	26	-0.00349885	0.0245104	0.996507	0.949766	1.04555	0.886488	22.7404	0.592719	0.00384202	0.0181259	0.833925
AC074389.9	Inverse variance weighted	4	-0.0891606	0.0844777	0.914699	0.77512	1.07941	0.291227	1.83658	0.607008	0.0409004	0.149407	0.809956
AC078883.3	Inverse variance weighted	17	-0.0227681	0.0405239	0.977489	0.902853	1.05829	0.574223	18.2225	0.311029	-0.0146515	0.0293429	0.624798
AC079031.1	Inverse variance weighted	8	-0.255383	0.06527	0.77462	0.6816	0.880334	9.12651e-05	8.29933	0.306941	-0.0655588	0.0328173	0.0927226
AC079325.5	Inverse variance weighted	13	0.0839315	0.0284815	1.08755	1.02851	1.14999	0.00321002	9.0697	0.696966	0.0317706	0.0212298	0.162651
AC079325.6	Inverse variance weighted	28	0.0113656	0.0192638	1.01143	0.973954	1.05035	0.555192	27.467	0.438829	0.00802903	0.0192778	0.680469
AC079630.4	Inverse variance weighted	2	0.050208	0.127284	1.05149	0.819329	1.34943	0.693245	NA	NA	NA	NA	NA
AC079767.4	Inverse variance weighted	13	0.0310804	0.0432346	1.03157	0.947755	1.12279	0.472216	11.4582	0.490113	-0.0263191	0.0322431	0.431667
AC079776.7	Inverse variance weighted	6	0.0045488	0.140523	1.00456	0.762711	1.32309	0.974177	8.46709	0.132303	-0.0808961	0.0550719	0.215783
AC079922.3	Inverse variance weighted	52	-0.0213314	0.0271203	0.978895	0.928219	1.03234	0.431548	48.0568	0.591275	0.00370682	0.0106174	0.728461
AC083799.1	Inverse variance weighted	2	-0.109441	0.139373	0.896335	0.682078	1.1779	0.432313	NA	NA	NA	NA	NA
AC083843.1	Inverse variance weighted	7	-0.100333	0.0697729	0.904536	0.788922	1.03709	0.150437	9.19196	0.163066	0.0764571	0.0604669	0.261806
AC083899.3	Inverse variance weighted	3	-0.115641	0.117438	0.890795	0.70764	1.12135	0.324773	2.90895	0.233523	-0.00255804	0.132217	0.987685
AC083949.1	Inverse variance weighted	13	0.0697803	0.0694306	1.07227	0.935847	1.22859	0.314879	21.0276	0.0499783	-0.0593695	0.0316792	0.0877082
AC084018.1	Inverse variance weighted	25	0.0421012	0.0492085	1.043	0.947103	1.14861	0.392237	33.7175	0.0898156	0.00445806	0.0179034	0.805566
AC087380.14	Inverse variance weighted	6	0.161184	0.0805854	1.1749	1.00324	1.37593	0.0454828	6.98226	0.221963	-0.0591368	0.0473077	0.279424
AC087793.1	Inverse variance weighted	12	0.0576472	0.0570989	1.05934	0.947179	1.18478	0.312686	3.76941	0.976183	-0.0144963	0.0486831	0.771974
AC090616.2	Inverse variance weighted	2	-0.0818618	0.139591	0.921399	0.700851	1.21135	0.55758	NA	NA	NA	NA	NA
AC090804.1	Inverse variance weighted	5	-0.115776	0.0734112	0.890675	0.771312	1.02851	0.114774	4.40085	0.354466	0.00615231	0.0564058	0.920032
AC091633.3	Inverse variance weighted	2	-0.0255707	0.118982	0.974753	0.771996	1.23076	0.829836	NA	NA	NA	NA	NA
AC091729.9	Inverse variance weighted	34	0.0400837	0.0201716	1.0409	1.00055	1.08288	0.0469074	37.6891	0.263312	-0.00779438	0.0232665	0.739808
AC091814.2	Inverse variance weighted	52	0.0594186	0.0253195	1.06122	1.00984	1.11521	0.0189377	56.6635	0.27201	-0.00982791	0.0119677	0.415427
AC091814.3	Inverse variance weighted	3	0.573851	0.229429	1.77509	1.13221	2.78301	0.012377	0.298371	0.861409	-0.0199533	0.0703411	0.824036
AC092171.4	Inverse variance weighted	2	0.348178	0.395252	1.41648	0.652779	3.07367	0.378372	NA	NA	NA	NA	NA
AC092295.7	Inverse variance weighted	9	-0.0702592	0.0551451	0.932152	0.836655	1.03855	0.202635	8.70382	0.367894	-0.010629	0.02943	0.728632
AC092580.4	Inverse variance weighted	3	-0.177153	0.187399	0.837652	0.580158	1.20943	0.344493	3.1647	0.205492	0.174691	0.101419	0.334866
AC092620.2	Inverse variance weighted	2	-0.115529	0.305421	0.890895	0.489606	1.62109	0.705237	NA	NA	NA	NA	NA
AC092620.3	Inverse variance weighted	5	0.0520515	0.104899	1.05343	0.857657	1.29389	0.61975	1.12108	0.890914	0.00978064	0.0592287	0.879339
AC092653.5	Inverse variance weighted	19	-0.00210737	0.0616188	0.997895	0.88437	1.12599	0.972718	36.8371	0.0055026	-0.00621202	0.0353849	0.862717
AC093063.2	Inverse variance weighted	6	0.0739194	0.0796083	1.07672	0.921168	1.25854	0.353128	2.3331	0.801393	-0.0273653	0.0674362	0.705662
AC093110.3	Inverse variance weighted	2	0.0988677	0.183008	1.10392	0.771185	1.58022	0.589032	NA	NA	NA	NA	NA
AC093159.1	Inverse variance weighted	6	0.0779211	0.12112	1.08104	0.852592	1.37069	0.520005	9.06306	0.106575	0.109719	0.0734859	0.209711
AC093162.5	Inverse variance weighted	6	0.00957696	0.0630403	1.00962	0.892274	1.14241	0.879252	7.03243	0.218239	0.172737	0.070596	0.0706852
AC093323.3	Inverse variance weighted	22	-0.0826294	0.0504258	0.920692	0.834048	1.01634	0.101289	22.6865	0.360916	-0.0358355	0.0194692	0.0805627
AC093391.2	Inverse variance weighted	2	0.280279	0.204933	1.3235	0.885688	1.97773	0.17142	NA	NA	NA	NA	NA
AC093415.2	Inverse variance weighted	3	0.0564157	0.153813	1.05804	0.782659	1.43031	0.713783	0.958462	0.619259	0.0765836	0.0813652	0.519266
AC093495.4	Inverse variance weighted	16	-0.020828	0.0390672	0.979387	0.907193	1.05733	0.593942	11.9046	0.686238	0.00879056	0.029586	0.770738
AC093609.1	Inverse variance weighted	5	-0.0440621	0.0742303	0.956895	0.827329	1.10675	0.552789	1.9896	0.737672	-0.0286374	0.0727735	0.72024
AC093616.4	Inverse variance weighted	4	0.091041	0.0649606	1.09531	0.964369	1.24404	0.16107	9.32543	0.0252628	0.0847713	0.0663271	0.329504
AC093627.10	Inverse variance weighted	13	0.00745115	0.0383851	1.00748	0.934463	1.0862	0.846086	10.7499	0.550467	-0.0180038	0.0191577	0.367516
AC093627.8	Inverse variance weighted	12	-0.0367818	0.0459986	0.963886	0.880787	1.05483	0.423925	6.36081	0.848238	0.00673156	0.0305311	0.829932
AC093627.9	Inverse variance weighted	5	0.0932479	0.0926211	1.09773	0.915496	1.31625	0.314047	1.87636	0.758487	-0.00341701	0.0727805	0.965504
AC093642.3	Inverse variance weighted	12	0.0138761	0.0370997	1.01397	0.942858	1.09045	0.708387	3.55129	0.981257	-0.00874868	0.0224456	0.704877
AC093642.4	Inverse variance weighted	2	0.117133	0.127134	1.12427	0.876298	1.44241	0.356874	NA	NA	NA	NA	NA
AC093668.3	Inverse variance weighted	15	-0.217073	0.0739913	0.804871	0.696215	0.930484	0.00334875	11.7376	0.627363	-0.0364142	0.0237438	0.149091
AC093673.5	Inverse variance weighted	18	0.0522632	0.0427962	1.05365	0.968877	1.14585	0.222006	15.2539	0.577196	0.0353703	0.0235688	0.152903
AC093690.1	Inverse variance weighted	5	0.242562	0.0772988	1.27451	1.09533	1.483	0.00170119	2.08158	0.720758	-0.00245269	0.0536617	0.966416
AC093726.6	Inverse variance weighted	12	0.12547	0.0744242	1.13368	0.979805	1.31172	0.0918191	9.69203	0.558283	0.049235	0.0259787	0.0873095
AC093818.1	Inverse variance weighted	12	-0.104609	0.0903526	0.900677	0.7545	1.07517	0.246952	9.10073	0.612595	-0.0371609	0.0332701	0.290136
AC093838.4	Inverse variance weighted	16	0.0237364	0.0254954	1.02402	0.974107	1.07649	0.351849	16.0256	0.38035	0.0165823	0.0251423	0.520254
AC093901.1	Inverse variance weighted	18	0.0321847	0.0853541	1.03271	0.87362	1.22077	0.706119	13.0107	0.735469	0.0233818	0.0194011	0.245659
AC096558.1	Inverse variance weighted	2	0.00715603	0.186084	1.00718	0.699375	1.45046	0.969324	NA	NA	NA	NA	NA
AC096579.13	Inverse variance weighted	5	0.0357678	0.0690685	1.03642	0.905193	1.18666	0.604557	1.57648	0.813013	-0.0246485	0.0258654	0.410917
AC097495.3	Inverse variance weighted	2	0.0417695	0.200314	1.04265	0.704092	1.54401	0.834823	NA	NA	NA	NA	NA
AC097500.2	Inverse variance weighted	2	-0.0623489	0.254027	0.939555	0.571071	1.5458	0.806114	NA	NA	NA	NA	NA
AC097662.2	Inverse variance weighted	3	-0.0573875	0.0684319	0.944228	0.825708	1.07976	0.40169	0.132853	0.935732	0.000653315	0.0570993	0.992716
AC097713.4	Inverse variance weighted	18	0.0326516	0.0335204	1.03319	0.967492	1.10335	0.330017	21.5267	0.203611	0.00209652	0.0286895	0.942651
AC097724.3	Inverse variance weighted	2	-0.100011	0.141891	0.904827	0.68515	1.19494	0.480907	NA	NA	NA	NA	NA
AC098614.2	Inverse variance weighted	4	-0.0780305	0.132058	0.924936	0.714006	1.19818	0.5546	1.22961	0.745911	-0.0493925	0.0596644	0.494818
AC098823.3	Inverse variance weighted	6	-0.15468	0.100224	0.856689	0.7039	1.04264	0.122749	3.35139	0.645983	0.0250728	0.0374671	0.540013
AC099552.2	Inverse variance weighted	7	-0.174933	0.0631225	0.839513	0.741816	0.950076	0.00558279	3.25515	0.776209	-0.0477457	0.029959	0.171884
AC099850.1	Inverse variance weighted	6	0.0289885	0.076941	1.02941	0.885311	1.19697	0.70635	3.30003	0.653837	0.0168527	0.0438359	0.720211
AC103965.1	Inverse variance weighted	23	-0.0320205	0.0329757	0.968487	0.907871	1.03315	0.331531	17.2364	0.75018	0.00165038	0.0196666	0.933917
AC104135.2	Inverse variance weighted	31	0.0120974	0.025931	1.01217	0.962013	1.06494	0.640841	34.9858	0.243156	0.010359	0.03067	0.73798
AC104135.3	Inverse variance weighted	25	0.0417617	0.0493374	1.04265	0.946542	1.14851	0.397301	27.6635	0.274487	-0.00346477	0.0333379	0.918127
AC104532.4	Inverse variance weighted	2	0.22171	0.13228	1.24821	0.963138	1.61765	0.0937247	NA	NA	NA	NA	NA
AC104634.3	Inverse variance weighted	5	-0.0216658	0.0703532	0.978567	0.85252	1.12325	0.758114	2.75591	0.599467	-0.0313177	0.107615	0.789999
AC104650.2	Inverse variance weighted	3	0.0950361	0.0989967	1.0997	0.905745	1.33518	0.337059	0.633238	0.728608	-0.0787529	0.110459	0.605697
AC104653.1	Inverse variance weighted	7	-0.112324	0.084597	0.893754	0.757195	1.05494	0.184259	1.92332	0.926614	0.0225875	0.0810974	0.791763
AC104809.2	Inverse variance weighted	3	0.313901	0.256311	1.36875	0.828226	2.26205	0.220694	2.12442	0.345691	-0.158231	0.118362	0.408864
AC104820.2	Inverse variance weighted	4	0.205296	0.181384	1.22789	0.860521	1.75209	0.257706	3.78816	0.285266	-0.168668	0.102132	0.240442
AC105020.1	Inverse variance weighted	5	-0.0331629	0.099366	0.967381	0.796188	1.17538	0.738572	2.87771	0.578494	0.0582764	0.093905	0.578825
AC105053.4	Inverse variance weighted	2	0.114989	0.129774	1.12186	0.869908	1.44679	0.375578	NA	NA	NA	NA	NA
AC105344.2	Inverse variance weighted	4	-0.296137	0.268187	0.743686	0.439647	1.25798	0.269498	5.66737	0.128964	0.0608374	0.181909	0.769864
AC106900.6	Inverse variance weighted	4	0.175976	0.177043	1.19241	0.842799	1.68705	0.320233	0.0483641	0.997212	-0.00156125	0.0572523	0.980721
AC108004.3	Inverse variance weighted	3	-0.0314198	0.141056	0.969069	0.734997	1.27768	0.823732	0.436031	0.804113	-0.0497891	0.090525	0.679878
AC108448.2	Inverse variance weighted	6	-0.0537175	0.0648174	0.9477	0.834636	1.07608	0.407245	3.49851	0.623613	0.0600778	0.0411583	0.218153
AC108463.2	Inverse variance weighted	7	-0.137593	0.0698523	0.871454	0.75995	0.999318	0.0488653	4.35592	0.62863	0.0832064	0.052879	0.176408
AC108463.3	Inverse variance weighted	5	-0.140381	0.149506	0.869027	0.648293	1.16492	0.34775	6.05842	0.194827	-0.0272753	0.10011	0.80295
AC108488.3	Inverse variance weighted	17	0.059409	0.0297595	1.06121	1.00108	1.12495	0.0459011	14.1183	0.5899	-0.00269107	0.0191585	0.890163
AC108488.4	Inverse variance weighted	2	0.06431	0.193643	1.06642	0.729621	1.5587	0.739809	NA	NA	NA	NA	NA
AC109309.4	Inverse variance weighted	14	-0.00333519	0.0338182	0.99667	0.932749	1.06497	0.921439	13.547	0.406503	-0.0136467	0.0332518	0.688743
AC109333.10	Inverse variance weighted	5	-0.0370755	0.0623054	0.963603	0.852831	1.08876	0.551803	4.69001	0.320608	0.0725983	0.0577138	0.297429
AC113189.5	Inverse variance weighted	19	-0.091504	0.0384317	0.912558	0.846343	0.983952	0.017268	25.8165	0.104028	-0.028208	0.0333386	0.409245
AC114752.3	Inverse variance weighted	15	0.00410316	0.0395685	1.00411	0.929182	1.08508	0.917409	11.1518	0.674068	0.039603	0.0266565	0.161207
AC116366.5	Inverse variance weighted	2	0.288286	0.140872	1.33414	1.01225	1.75838	0.0407134	NA	NA	NA	NA	NA
AC116366.6	Inverse variance weighted	3	0.258799	0.142489	1.29537	0.979728	1.71271	0.0693291	6.97833	0.0305263	0.107654	0.0975131	0.468559
AC116614.1	Inverse variance weighted	20	0.124669	0.0380509	1.13277	1.05136	1.22049	0.00105154	22.2183	0.273525	0.0613535	0.0235479	0.0178919
AC118278.1	Inverse variance weighted	29	-0.0201061	0.0203512	0.980095	0.94177	1.01998	0.323173	27.8804	0.470799	-0.0264709	0.0157473	0.104301
AC123768.4	Inverse variance weighted	6	-0.0772627	0.0782512	0.925647	0.794029	1.07908	0.323462	5.69833	0.336688	0.0125903	0.0628889	0.851091
AC124944.2	Inverse variance weighted	4	-0.156483	0.124015	0.855146	0.67062	1.09045	0.207019	0.847131	0.838164	-0.0117012	0.0599514	0.863284
AC124944.3	Inverse variance weighted	4	-0.117685	0.0961878	0.888976	0.73623	1.07341	0.221145	0.578736	0.901283	0.00111784	0.0704421	0.98878
AC125232.1	Inverse variance weighted	24	-0.00305823	0.0305792	0.996946	0.93895	1.05853	0.920336	32.2276	0.095502	0.0228604	0.0304196	0.460316
AC125238.4	Inverse variance weighted	16	-0.056944	0.0363743	0.944647	0.879644	1.01445	0.117465	14.0482	0.521874	-0.00580617	0.0216278	0.792262
AC126365.4	Inverse variance weighted	2	-0.227086	0.428223	0.796852	0.344245	1.84454	0.595905	NA	NA	NA	NA	NA
AC127496.1	Inverse variance weighted	2	0.0169332	0.21038	1.01708	0.673402	1.53615	0.935849	NA	NA	NA	NA	NA
AC127904.2	Inverse variance weighted	13	-0.100269	0.0462567	0.904594	0.826189	0.99044	0.0301848	6.05785	0.913138	-0.0175869	0.0313944	0.586577
AC128709.1	Inverse variance weighted	32	-0.009553	0.0276738	0.990492	0.938199	1.0457	0.729944	15.8439	0.988941	0.0269864	0.0191282	0.168584
AC129929.5	Inverse variance weighted	3	-0.139736	0.104796	0.869587	0.708123	1.06787	0.182397	0.690555	0.708024	0.0478969	0.0814052	0.661427
AC130352.1	Inverse variance weighted	7	0.007021	0.0819544	1.00705	0.857607	1.18252	0.931729	6.45192	0.374512	0.0391194	0.0490998	0.461745
AC131056.3	Inverse variance weighted	13	0.101249	0.0464105	1.10655	1.01034	1.21193	0.0291388	11.3821	0.496491	0.0280808	0.0385949	0.482072
AC131097.3	Inverse variance weighted	20	0.0424083	0.0246578	1.04332	0.994096	1.09498	0.0854555	16.1736	0.645667	-0.0139262	0.0300753	0.648882
AC131971.1	Inverse variance weighted	6	0.0928003	0.0560419	1.09724	0.983103	1.22463	0.0977401	2.55003	0.768942	-0.0131544	0.0345236	0.722557
AC132872.1	Inverse variance weighted	3	-0.0578103	0.146039	0.943829	0.708896	1.25662	0.692212	1.95507	0.376238	-0.0802926	0.0578677	0.397563
AC132872.2	Inverse variance weighted	3	-0.120726	0.187881	0.886277	0.613256	1.28085	0.520507	0.0502117	0.975207	0.0335769	0.156291	0.865279
AC133528.2	Inverse variance weighted	6	-0.156581	0.143598	0.855062	0.645304	1.133	0.27553	1.67013	0.892642	-0.0362714	0.0322425	0.323543
AC135178.1	Inverse variance weighted	4	-0.136475	0.193467	0.872428	0.5971	1.27471	0.480552	2.40949	0.491871	0.0254675	0.0765846	0.771101
AC137932.5	Inverse variance weighted	10	0.101098	0.0416637	1.10638	1.01963	1.20052	0.0152447	8.52062	0.482647	0.0177334	0.0177911	0.348073
AC137932.6	Inverse variance weighted	3	-0.090025	0.0957039	0.913908	0.757596	1.10247	0.346879	1.30332	0.52118	0.0739328	0.0688878	0.477521
AC138744.2	Inverse variance weighted	3	0.00668307	0.114335	1.00671	0.804597	1.25958	0.953389	3.13151	0.20893	-0.0909683	0.0609211	0.375667
AC139100.2	Inverse variance weighted	4	0.0574937	0.124687	1.05918	0.829533	1.3524	0.644723	2.30976	0.510653	0.0107716	0.0359365	0.792657
AC141586.5	Inverse variance weighted	9	0.0532654	0.0479442	1.05471	0.960112	1.15863	0.266574	3.08009	0.929231	0.00809918	0.0273333	0.77559
AC144831.1	Inverse variance weighted	6	0.0204033	0.0694846	1.02061	0.890665	1.16952	0.769035	4.9785	0.418509	0.0201253	0.0368098	0.613629
AC147651.3	Inverse variance weighted	6	-0.00328486	0.0352615	0.996721	0.930161	1.06804	0.925779	3.21417	0.667006	-0.0324765	0.0333066	0.384735
AC147651.4	Inverse variance weighted	5	0.0525244	0.164789	1.05393	0.763027	1.45573	0.749925	1.2796	0.864827	-0.00910331	0.045267	0.853481
AC159540.1	Inverse variance weighted	33	0.0523007	0.0243769	1.05369	1.00453	1.10526	0.0319127	44.7471	0.0666144	0.0294923	0.0202313	0.154966
AC226150.4	Inverse variance weighted	2	-0.0407274	0.147346	0.960091	0.719265	1.28155	0.782235	NA	NA	NA	NA	NA
ACAA1	Inverse variance weighted	5	0.0515468	0.0986249	1.0529	0.867831	1.27743	0.601214	2.58875	0.628818	0.0513928	0.0434763	0.322333
ACAA2	Inverse variance weighted	9	0.0392133	0.13338	1.03999	0.800746	1.35072	0.768761	15.9422	0.0432149	-0.0388433	0.0526288	0.48448
ACACA	Inverse variance weighted	8	0.00534546	0.141506	1.00536	0.76185	1.3267	0.969867	6.72147	0.458445	-0.0217418	0.0407794	0.613086
ACACB	Inverse variance weighted	45	0.0823217	0.0405512	1.08581	1.00285	1.17563	0.04235	33.5565	0.873555	0.00142441	0.013014	0.913353
ACAD10	Inverse variance weighted	3	-0.311279	0.522246	0.73251	0.26319	2.03872	0.551149	4.74389	0.0932989	0.182769	0.0854619	0.27845
ACAD8	Inverse variance weighted	24	0.0248466	0.054941	1.02516	0.920501	1.14171	0.651094	19.7601	0.656336	-0.0204875	0.023749	0.397627
ACAD9	Inverse variance weighted	15	-0.0811106	0.0599123	0.922092	0.819928	1.03698	0.175793	14.3909	0.421015	-0.0168098	0.0170125	0.341145
ACADM	Inverse variance weighted	34	-0.0801192	0.047022	0.923006	0.841742	1.01212	0.0884061	21.548	0.937211	-0.00777058	0.0138302	0.578129
ACADSB	Inverse variance weighted	4	-0.0487486	0.373541	0.952421	0.457999	1.98058	0.896168	4.13042	0.247721	0.174257	0.19114	0.458177
ACADVL	Inverse variance weighted	22	-0.206696	0.0652895	0.813267	0.715579	0.924291	0.00154637	19.0506	0.581896	-0.00298282	0.0250545	0.906421
ACAP1	Inverse variance weighted	34	0.0665886	0.0379261	1.06886	0.992283	1.15134	0.0791316	38.265	0.2427	-0.00171406	0.0148792	0.909008
ACAT1	Inverse variance weighted	20	-0.105014	0.0569791	0.900312	0.805177	1.00669	0.0653254	29.817	0.0541737	0.00401776	0.0242279	0.870138
ACAT2	Inverse variance weighted	19	-0.197268	0.0842761	0.820971	0.69597	0.968423	0.0192459	10.8467	0.900747	-0.00602276	0.0241207	0.805817
ACBD3	Inverse variance weighted	18	-0.147226	0.120083	0.863099	0.682093	1.09214	0.220186	23.4343	0.13564	0.0202458	0.0256219	0.440981
ACBD4	Inverse variance weighted	6	-0.194108	0.191137	0.823569	0.566241	1.19784	0.309846	4.72429	0.450446	-0.0372946	0.0620199	0.580036
ACBD5	Inverse variance weighted	3	0.00850321	0.334547	1.00854	0.523505	1.94297	0.979722	0.248796	0.883028	-0.0307476	0.0947987	0.80033
ACBD6	Inverse variance weighted	6	-0.066497	0.125215	0.935666	0.732041	1.19593	0.595377	0.701918	0.982863	-5.68842e-05	0.0348488	0.998776
ACCS	Inverse variance weighted	46	0.0275803	0.0254788	1.02796	0.97789	1.0806	0.279039	30.3029	0.954226	0.0203892	0.0129782	0.12334
ACD	Inverse variance weighted	5	-0.12008	0.1411	0.88685	0.67258	1.16938	0.394754	2.51921	0.6412	-0.0736018	0.0511618	0.245848
ACER1	Inverse variance weighted	3	0.322199	0.224359	1.38016	0.889101	2.14244	0.150978	0.628216	0.73044	-0.0858931	0.149281	0.66761
ACER3	Inverse variance weighted	26	0.0702879	0.0482424	1.07282	0.976025	1.17921	0.145124	28.5748	0.282079	0.0282111	0.0197689	0.166448
ACLY	Inverse variance weighted	6	-0.11946	0.138619	0.887399	0.676277	1.16443	0.388804	5.49603	0.358381	-0.0371289	0.0383143	0.387391
ACN9	Inverse variance weighted	4	0.115148	0.268332	1.12204	0.663131	1.89853	0.667832	4.57565	0.205641	0.0207058	0.0705459	0.796789
ACO1	Inverse variance weighted	20	-0.12544	0.08559	0.882109	0.745876	1.04322	0.14276	18.7847	0.470725	0.0437639	0.0247335	0.0937631
ACOT1	Inverse variance weighted	15	-0.0193407	0.115765	0.980845	0.781735	1.23067	0.867316	19.1586	0.158976	-0.0286398	0.0267906	0.304508
ACOT11	Inverse variance weighted	11	-0.12231	0.128872	0.884874	0.687359	1.13915	0.342581	9.91369	0.448098	-0.0189235	0.0442552	0.678992
ACOT13	Inverse variance weighted	19	0.195103	0.099416	1.21544	1.00025	1.47692	0.0497051	23.3391	0.177893	0.0187815	0.025747	0.475649
ACOT2	Inverse variance weighted	20	-0.100707	0.0753257	0.904198	0.780091	1.04805	0.181238	10.4954	0.93965	-0.0190128	0.0181914	0.309784
ACOT4	Inverse variance weighted	45	-0.0638167	0.0322261	0.938177	0.880751	0.999347	0.0476722	40.3668	0.628115	-0.0291331	0.015468	0.0664158
ACOT7	Inverse variance weighted	7	0.217018	0.105416	1.24237	1.01046	1.5275	0.0395253	3.49744	0.74431	-0.0343043	0.0345182	0.365949
ACOT8	Inverse variance weighted	2	0.274802	0.342193	1.31627	0.673076	2.5741	0.42194	NA	NA	NA	NA	NA
ACOX1	Inverse variance weighted	56	-0.0159233	0.0334793	0.984203	0.921693	1.05095	0.634348	56.5598	0.416517	0.00760148	0.0131093	0.564424
ACOX3	Inverse variance weighted	7	0.0129557	0.102108	1.01304	0.829297	1.23749	0.899034	5.4825	0.483574	-0.0874019	0.0397872	0.07942
ACOXL	Inverse variance weighted	4	0.13011	0.236123	1.13895	0.716992	1.80925	0.581616	1.03504	0.792775	-0.0245916	0.0467556	0.651417
ACP1	Inverse variance weighted	7	-0.238214	0.150893	0.788034	0.586276	1.05922	0.114406	5.77864	0.448439	-0.0124307	0.0303406	0.698985
ACP2	Inverse variance weighted	35	-0.0350663	0.0405379	0.965541	0.891794	1.04539	0.387025	45.2481	0.0940486	0.00902261	0.0225824	0.692068
ACP5	Inverse variance weighted	58	0.0723379	0.0329703	1.07502	1.00775	1.14678	0.028233	64.6403	0.227315	0.00491043	0.0181697	0.787959
ACP6	Inverse variance weighted	31	-0.0987583	0.0397719	0.905962	0.838022	0.979409	0.0130237	23.8825	0.777313	0.00310338	0.0178641	0.863291
ACPL2	Inverse variance weighted	34	0.0546783	0.0430879	1.0562	0.970665	1.14927	0.204444	42.2639	0.129518	-0.0461263	0.0220582	0.0445429
ACPP	Inverse variance weighted	36	0.0175206	0.0434552	1.01768	0.934586	1.10815	0.686809	31.7387	0.626345	0.0188482	0.0134545	0.170311
ACRBP	Inverse variance weighted	2	0.334552	0.339446	1.39731	0.718375	2.71792	0.324339	NA	NA	NA	NA	NA
ACSBG1	Inverse variance weighted	2	-0.784318	0.278152	0.456431	0.264611	0.787305	0.0048062	NA	NA	NA	NA	NA
ACSF2	Inverse variance weighted	12	0.19742	0.158391	1.21826	0.893127	1.66174	0.212614	18.3023	0.0748258	0.0200311	0.0367836	0.597985
ACSF3	Inverse variance weighted	18	0.0513037	0.102446	1.05264	0.861146	1.28672	0.616522	15.3946	0.56708	0.0299897	0.0272753	0.28781
ACSL3	Inverse variance weighted	7	-0.100608	0.156691	0.904287	0.665163	1.22938	0.520821	2.40374	0.879081	0.0116909	0.0260883	0.672811
ACSL5	Inverse variance weighted	37	-0.0532487	0.0395639	0.948144	0.877398	1.02459	0.178338	38.2142	0.369166	-0.0217993	0.0205709	0.296533
ACSL6	Inverse variance weighted	4	-0.280641	0.164526	0.755299	0.547106	1.04272	0.088054	1.60099	0.659164	-0.150697	0.15902	0.443327
ACSM1	Inverse variance weighted	12	-0.283876	0.15566	0.75286	0.554899	1.02144	0.0681973	22.4948	0.0208082	-0.00858601	0.0377319	0.824579
ACSM3	Inverse variance weighted	9	0.0778194	0.160866	1.08093	0.788614	1.48159	0.628561	10.59	0.226031	-0.041817	0.035682	0.279561
ACSS1	Inverse variance weighted	23	-0.00763172	0.0705305	0.992397	0.864269	1.13952	0.913834	19.6826	0.602885	0.00254435	0.0237839	0.915822
ACSS2	Inverse variance weighted	3	-0.365674	0.335009	0.693729	0.35977	1.33769	0.275038	1.06927	0.585883	-0.0293399	0.088794	0.796834
ACSS3	Inverse variance weighted	2	-0.120117	0.430657	0.886816	0.381286	2.06261	0.780309	NA	NA	NA	NA	NA
ACTA2	Inverse variance weighted	98	-0.0476414	0.0221706	0.953476	0.91293	0.995822	0.0316458	92.4025	0.613085	-0.00691027	0.00893346	0.441111
ACTBP14	Inverse variance weighted	3	0.0159247	0.147447	1.01605	0.761038	1.35652	0.913994	4.19584	0.122712	-0.0116798	0.111282	0.933426
ACTBP8	Inverse variance weighted	55	-0.00503791	0.0166257	0.994975	0.963075	1.02793	0.761875	37.6739	0.95533	-0.00143576	0.0129903	0.91241
ACTG1	Inverse variance weighted	3	-0.32747	0.209881	0.720745	0.47767	1.08752	0.118697	0.167059	0.919864	-0.0293325	0.0717793	0.75303
ACTL10	Inverse variance weighted	2	-0.532066	0.289933	0.58739	0.332759	1.03687	0.0664861	NA	NA	NA	NA	NA
ACTN1-AS1	Inverse variance weighted	11	-0.0107012	0.048994	0.989356	0.898769	1.08907	0.827103	8.05796	0.623175	-0.0398281	0.0404102	0.350084
ACTN1	Inverse variance weighted	7	-0.0814291	0.193787	0.921798	0.630494	1.34769	0.67434	7.33088	0.291329	-0.0933418	0.0446413	0.0907927
ACTN3	Inverse variance weighted	9	0.222859	0.159973	1.24964	0.913302	1.70985	0.163589	10.4597	0.234229	-0.0137573	0.0575597	0.817945
ACTN4	Inverse variance weighted	12	0.18686	0.12392	1.20546	0.945518	1.53686	0.131577	11.2775	0.420318	0.0366542	0.0329677	0.29223
ACTR10	Inverse variance weighted	8	0.0485393	0.0662463	1.04974	0.921914	1.19528	0.463736	8.64347	0.279277	-0.00840799	0.0270113	0.766121
ACTR1A	Inverse variance weighted	10	0.0628819	0.176454	1.0649	0.753545	1.50491	0.721567	11.4606	0.245453	-0.0636534	0.0374538	0.127646
ACTR1B	Inverse variance weighted	16	-0.103816	0.0714565	0.901391	0.783589	1.0369	0.146263	19.0063	0.213448	-0.0390014	0.0240861	0.127693
ACTR2	Inverse variance weighted	6	-0.452585	0.18034	0.635982	0.446618	0.905635	0.0120861	3.00588	0.699079	-0.0426711	0.0408783	0.355482
ACTR3	Inverse variance weighted	2	0.507134	0.358578	1.66053	0.822276	3.35331	0.157277	NA	NA	NA	NA	NA
ACTR3B	Inverse variance weighted	2	0.399093	0.369546	1.49047	0.72237	3.0753	0.280163	NA	NA	NA	NA	NA
ACTR5	Inverse variance weighted	44	0.000851678	0.0479232	1.00085	0.911123	1.09942	0.985821	31.3707	0.905814	0.00414882	0.0177621	0.816448
ACTR8	Inverse variance weighted	6	-0.231872	0.210912	0.793047	0.524526	1.19903	0.271603	1.74857	0.882725	0.000363104	0.0455457	0.994021
ACVR1	Inverse variance weighted	8	0.134871	0.134423	1.14439	0.879327	1.48935	0.3157	8.15302	0.319295	0.02949	0.0342702	0.422554
ACVR1B	Inverse variance weighted	7	0.134469	0.16693	1.14393	0.824717	1.58669	0.420509	4.94811	0.550486	0.0232807	0.0365369	0.552033
ACVR2A	Inverse variance weighted	15	0.245528	0.0958119	1.2783	1.05944	1.54237	0.0103892	12.4184	0.572737	0.0249959	0.028986	0.404127
ACVR2B-AS1	Inverse variance weighted	2	0.35242	0.299296	1.42251	0.791204	2.55752	0.238997	NA	NA	NA	NA	NA
ACVR2B	Inverse variance weighted	15	0.1161	0.0707943	1.12311	0.977598	1.29028	0.101013	19.9512	0.131688	0.0158389	0.0264548	0.559651
ACVRL1	Inverse variance weighted	16	0.0374605	0.081308	1.03817	0.885234	1.21753	0.644997	8.62095	0.896489	-0.00767829	0.0174065	0.665865
ACY3	Inverse variance weighted	8	0.21794	0.147995	1.24351	0.93041	1.66198	0.140854	4.59804	0.708881	0.0498618	0.0335042	0.18726
ACYP1	Inverse variance weighted	2	0.0532052	0.320191	1.05465	0.56306	1.97542	0.868025	NA	NA	NA	NA	NA
ACYP2	Inverse variance weighted	50	-0.032448	0.0425227	0.968073	0.89066	1.05221	0.44542	53.6855	0.29948	0.0128886	0.0169996	0.452054
AD000090.2	Inverse variance weighted	4	-0.0931038	0.0927977	0.911099	0.759582	1.09284	0.315717	3.39385	0.334792	-0.0485378	0.0956571	0.662284
AD000684.2	Inverse variance weighted	5	-0.0444961	0.0968082	0.956479	0.791172	1.15633	0.645781	6.62853	0.15687	0.0848046	0.0490626	0.182344
ADA	Inverse variance weighted	18	-0.0608287	0.0474937	0.940984	0.857344	1.03278	0.200273	10.5058	0.881072	0.0346188	0.0238051	0.165209
ADAL	Inverse variance weighted	15	-0.0696541	0.0927066	0.932716	0.777743	1.11857	0.452449	7.95388	0.891715	0.0109908	0.0247833	0.664712
ADAM10	Inverse variance weighted	13	-0.17625	0.0805746	0.838409	0.715928	0.981843	0.0287125	4.02244	0.983028	-0.0200292	0.0186922	0.30688
ADAM12	Inverse variance weighted	9	0.131775	0.146814	1.14085	0.855576	1.52125	0.369418	3.23778	0.918561	-0.00204108	0.0301978	0.948002
ADAM15	Inverse variance weighted	41	-0.0180807	0.0405685	0.982082	0.907016	1.06336	0.655826	49.8658	0.136385	-0.00994067	0.0163479	0.546665
ADAM17	Inverse variance weighted	17	-0.12602	0.0822982	0.881597	0.750268	1.03591	0.125705	17.6212	0.346542	0.0103247	0.0337149	0.763634
ADAM19	Inverse variance weighted	27	0.110168	0.0640328	1.11647	0.984781	1.26576	0.0853425	33.6487	0.1441	0.0196155	0.0176641	0.277364
ADAM1A	Inverse variance weighted	13	0.0269553	0.05252	1.02732	0.926831	1.13871	0.607785	22.3287	0.0339964	0.0214262	0.0323535	0.521443
ADAM1B	Inverse variance weighted	4	-0.146343	0.0869191	0.863862	0.728546	1.02431	0.092246	0.0730153	0.994866	0.0115733	0.0440809	0.817471
ADAM23	Inverse variance weighted	4	-0.796771	0.183998	0.450782	0.3143	0.64653	1.48889e-05	2.14041	0.543781	-0.0130901	0.18365	0.949663
ADAM28	Inverse variance weighted	16	0.00576447	0.110138	1.00578	0.810498	1.24812	0.958259	22.1598	0.103681	-0.0788511	0.0274707	0.0123435
ADAM8	Inverse variance weighted	9	-0.212293	0.147138	0.808728	0.606116	1.07907	0.149074	9.77537	0.281147	-0.0582452	0.0360582	0.150277
ADAM9	Inverse variance weighted	7	0.299493	0.236222	1.34917	0.849165	2.1436	0.204853	12.2931	0.0557412	0.170434	0.150877	0.309896
ADAMDEC1	Inverse variance weighted	8	0.0302738	0.126644	1.03074	0.804166	1.32114	0.81107	8.31383	0.305736	0.0364077	0.0436058	0.435735
ADAMTS1	Inverse variance weighted	13	-0.0321951	0.102585	0.968318	0.791946	1.18397	0.753645	9.72355	0.640199	0.0120074	0.0237773	0.623526
ADAMTS10	Inverse variance weighted	8	0.200634	0.129184	1.22218	0.948791	1.57434	0.120402	8.24419	0.311555	0.0290317	0.0294904	0.362913
ADAMTS13	Inverse variance weighted	7	0.190339	0.130742	1.20966	0.936209	1.56298	0.145439	7.25211	0.298161	0.0559373	0.0239556	0.0667911
ADAMTS17	Inverse variance weighted	14	0.127233	0.0920745	1.13568	0.948159	1.36029	0.167019	16.413	0.227546	-0.0396906	0.0459188	0.404335
ADAMTS2	Inverse variance weighted	5	-0.0679116	0.184219	0.934343	0.651172	1.34065	0.712392	4.12079	0.389905	-0.0110837	0.0526357	0.846711
ADAMTS5	Inverse variance weighted	8	-0.00482138	0.159559	0.99519	0.727925	1.36059	0.975894	5.88746	0.55295	-0.0140177	0.033749	0.692329
ADAMTS6	Inverse variance weighted	20	-0.255683	0.0831034	0.774388	0.65799	0.911376	0.0020932	9.64033	0.961267	-0.0300892	0.0234633	0.215974
ADAMTSL2	Inverse variance weighted	12	0.1466	0.065717	1.15789	1.01795	1.31706	0.0256963	14.4623	0.208461	0.0412553	0.0286148	0.179948
ADAMTSL4	Inverse variance weighted	9	-0.000674616	0.0774297	0.999326	0.858613	1.1631	0.993048	5.00896	0.756618	0.00589356	0.0175672	0.747088
ADAP1	Inverse variance weighted	25	-0.0546932	0.0621779	0.946776	0.838147	1.06948	0.379063	35.6915	0.0587849	0.00818232	0.0247484	0.743924
ADAR	Inverse variance weighted	8	-0.125632	0.19112	0.881939	0.606393	1.28269	0.510956	7.38992	0.38944	-0.0738309	0.0747566	0.361478
ADARB1	Inverse variance weighted	22	-0.156204	0.0794025	0.855385	0.732104	0.999425	0.0491557	32.6354	0.0504195	-0.0396423	0.0289461	0.186018
ADARB2	Inverse variance weighted	63	-0.0704307	0.036128	0.931992	0.868279	1.00038	0.0512388	46.6781	0.926171	0.00599032	0.0118298	0.614419
ADAT1	Inverse variance weighted	49	0.00609981	0.0341853	1.00612	0.940914	1.07584	0.858382	45.7407	0.565896	-0.0221849	0.014539	0.133741
ADAT2	Inverse variance weighted	9	0.223057	0.0770479	1.24989	1.0747	1.45364	0.00379111	3.19518	0.921518	-0.0106835	0.0313095	0.742949
ADAT3	Inverse variance weighted	2	-0.89947	0.696154	0.406785	0.103941	1.592	0.196337	NA	NA	NA	NA	NA
ADC	Inverse variance weighted	3	-0.336783	0.308207	0.714064	0.390289	1.30644	0.274518	0.3702	0.831021	0.0572382	0.0947773	0.654125
ADCK1	Inverse variance weighted	53	0.016639	0.0322165	1.01678	0.954559	1.08305	0.605523	62.5478	0.150095	-0.014946	0.00942421	0.11894
ADCK2	Inverse variance weighted	30	-0.0288681	0.0457406	0.971545	0.888234	1.06267	0.527958	19.3834	0.911057	0.00100024	0.0164932	0.952072
ADCK3	Inverse variance weighted	82	0.00526023	0.0260285	1.00527	0.955275	1.05789	0.839843	82.3269	0.438007	-0.0118079	0.011522	0.30854
ADCK4	Inverse variance weighted	7	0.340705	0.189274	1.40594	0.970182	2.03741	0.0718503	6.47409	0.372226	0.0977758	0.0516114	0.11669
ADCY10P1	Inverse variance weighted	47	0.0234813	0.0328613	1.02376	0.959899	1.09187	0.474882	46.2155	0.463357	0.0274735	0.0127336	0.0363377
ADCY3	Inverse variance weighted	10	0.0927763	0.138624	1.09722	0.836167	1.43976	0.503326	12.828	0.170545	0.0374779	0.0473818	0.451769
ADCY4	Inverse variance weighted	3	-0.366761	0.34125	0.692975	0.355009	1.35268	0.282483	0.860625	0.650306	0.145485	0.240521	0.653681
ADCY7	Inverse variance weighted	18	-0.040587	0.0632482	0.960226	0.848272	1.08695	0.521062	15.3624	0.569398	-0.0108896	0.0249467	0.668296
ADCY9	Inverse variance weighted	44	0.061756	0.0463474	1.0637	0.971334	1.16486	0.182709	34.4371	0.821136	-0.00351504	0.0161159	0.8284
ADD1	Inverse variance weighted	10	-0.0651374	0.14751	0.936939	0.701694	1.25105	0.658794	8.54058	0.480715	-0.0435045	0.0372338	0.276277
ADD2	Inverse variance weighted	8	-0.00905895	0.233522	0.990982	0.627029	1.56619	0.969056	15.2129	0.0333649	-0.0654171	0.0914922	0.501468
ADD3	Inverse variance weighted	20	0.0906197	0.0987413	1.09485	0.902205	1.32864	0.358751	22.513	0.259475	-0.0107861	0.0248947	0.669966
ADH5	Inverse variance weighted	9	-0.0610913	0.15661	0.940737	0.692085	1.27873	0.696473	5.38165	0.716114	-0.0534396	0.0293566	0.111509
ADHFE1	Inverse variance weighted	65	0.014566	0.0289214	1.01467	0.958755	1.07385	0.614514	45.4068	0.962136	-0.00430796	0.014094	0.760872
ADI1	Inverse variance weighted	28	-0.00196725	0.0523571	0.998035	0.900696	1.10589	0.970028	28.9496	0.363345	0.0203932	0.0160048	0.213867
ADIPOR1	Inverse variance weighted	5	0.0727378	0.240707	1.07545	0.670959	1.72379	0.762511	6.40744	0.170717	0.0184216	0.108945	0.876483
ADIPOR2	Inverse variance weighted	7	-0.166765	0.131239	0.846399	0.654428	1.09468	0.203837	4.41666	0.620482	0.104917	0.0851383	0.272615
ADK	Inverse variance weighted	60	0.00747167	0.0229709	1.0075	0.963145	1.0539	0.744979	66.6718	0.230089	0.0181009	0.0143091	0.210932
ADM	Inverse variance weighted	27	-0.00403148	0.0683456	0.995977	0.871108	1.13874	0.952963	25.3771	0.497718	-0.00125174	0.0222953	0.955673
ADM2	Inverse variance weighted	7	-0.178743	0.228985	0.836321	0.533896	1.31005	0.435044	9.5755	0.143705	-0.0339408	0.07659	0.676175
ADNP	Inverse variance weighted	2	0.332737	0.692644	1.39478	0.358852	5.42122	0.630952	NA	NA	NA	NA	NA
ADNP2	Inverse variance weighted	2	0.0732302	0.348539	1.07598	0.543402	2.13052	0.833585	NA	NA	NA	NA	NA
ADO	Inverse variance weighted	14	0.0253222	0.0975766	1.02565	0.847107	1.24181	0.795241	10.7518	0.631598	0.0161704	0.0347853	0.650351
ADORA1	Inverse variance weighted	24	-0.0342573	0.0538597	0.966323	0.869513	1.07391	0.524746	21.9133	0.52549	0.024835	0.0166486	0.149975
ADORA2A	Inverse variance weighted	4	-0.37308	0.253771	0.68861	0.418755	1.13237	0.141523	5.25388	0.154123	0.146087	0.133984	0.38942
ADORA2B	Inverse variance weighted	33	-0.00471805	0.0461498	0.995293	0.909217	1.08952	0.918571	22.2926	0.899383	0.00499953	0.0201662	0.805834
ADORA3	Inverse variance weighted	18	0.0503493	0.101825	1.05164	0.861374	1.28393	0.620974	7.4471	0.976987	0.00174923	0.0273379	0.949774
ADPGK-AS1	Inverse variance weighted	2	-0.0741021	0.101088	0.928577	0.761675	1.13205	0.463533	NA	NA	NA	NA	NA
ADPGK	Inverse variance weighted	9	-0.0355038	0.103	0.965119	0.788689	1.18102	0.730322	7.27669	0.507095	-0.00159197	0.0267879	0.954272
ADPRH	Inverse variance weighted	25	0.14307	0.0570987	1.15381	1.03165	1.29044	0.0122225	16.528	0.868084	-0.000333796	0.0163595	0.983897
ADPRHL1	Inverse variance weighted	4	-0.167546	0.274867	0.845737	0.493473	1.44946	0.542158	3.13603	0.371124	0.122487	0.0878745	0.29803
ADRB1	Inverse variance weighted	13	0.00468433	0.103134	1.0047	0.820814	1.22977	0.963773	14.9902	0.241973	-0.0229714	0.0221356	0.321658
ADRB2	Inverse variance weighted	4	-0.0324013	0.201481	0.968118	0.652265	1.43692	0.872239	1.34671	0.718072	-0.00572547	0.0675024	0.940132
ADRBK2	Inverse variance weighted	4	-0.0317398	0.132298	0.968759	0.747483	1.25554	0.810399	3.53632	0.316082	0.0582968	0.0377274	0.262316
ADSL	Inverse variance weighted	11	-0.152061	0.116574	0.858936	0.683488	1.07942	0.192093	6.89449	0.735367	0.0257064	0.0308894	0.426821
ADSS	Inverse variance weighted	39	-0.025056	0.0385437	0.975255	0.904293	1.05179	0.515648	27.6435	0.892272	-0.00535934	0.0117235	0.650238
ADSSL1	Inverse variance weighted	2	0.292481	0.283866	1.33975	0.768053	2.33698	0.302847	NA	NA	NA	NA	NA
ADTRP	Inverse variance weighted	15	0.064036	0.0498308	1.06613	0.966927	1.17551	0.198768	9.48114	0.79905	-0.0153392	0.0240692	0.534995
AE000661.37	Inverse variance weighted	10	-0.0365919	0.056783	0.96407	0.862529	1.07756	0.519306	11.0812	0.270185	0.0299973	0.0359888	0.428736
AE000661.50	Inverse variance weighted	4	0.0891822	0.115341	1.09328	0.87207	1.3706	0.439401	5.37	0.146624	0.106124	0.0577633	0.207578
AEBP1	Inverse variance weighted	16	0.270734	0.0968809	1.31093	1.08421	1.58506	0.00519802	13.8549	0.536557	0.0458449	0.0292913	0.139868
AEBP2	Inverse variance weighted	2	-0.0346535	0.179233	0.96594	0.679804	1.37251	0.84669	NA	NA	NA	NA	NA
AEN	Inverse variance weighted	13	0.10734	0.0616199	1.11331	0.986654	1.25623	0.0815152	7.74693	0.804581	0.0363477	0.0219481	0.125925
AES	Inverse variance weighted	8	0.0820133	0.109222	1.08547	0.876287	1.34459	0.45272	3.44961	0.840534	-0.0430654	0.0397917	0.320698
AF001548.5	Inverse variance weighted	39	0.0267641	0.018888	1.02713	0.989796	1.06586	0.156485	43.1591	0.260212	-0.0164068	0.0164431	0.324863
AF001548.6	Inverse variance weighted	18	0.0559779	0.0401183	1.05757	0.977601	1.14409	0.16292	25.9927	0.0745935	0.0153257	0.0291491	0.606259
AF064858.8	Inverse variance weighted	3	-0.186904	0.117897	0.829523	0.658374	1.04516	0.112894	0.91213	0.633773	-0.0529991	0.0929597	0.670125
AF131215.2	Inverse variance weighted	110	-0.0356205	0.0177245	0.965006	0.932058	0.99912	0.0444657	142.463	0.017305	-0.0237735	0.0180193	0.189847
AF131215.9	Inverse variance weighted	117	-0.0235205	0.0161745	0.976754	0.946275	1.00821	0.145897	143.584	0.0420365	-0.0288933	0.0174992	0.101442
AF131217.1	Inverse variance weighted	2	-0.0367067	0.147147	0.963959	0.722444	1.28621	0.803008	NA	NA	NA	NA	NA
AF146191.4	Inverse variance weighted	5	-0.0609789	0.0881595	0.940843	0.791543	1.1183	0.489133	10.1029	0.0387302	-0.0990897	0.0333602	0.0590542
AF216667.1	Inverse variance weighted	4	-0.248975	0.0695542	0.7796	0.680246	0.893465	0.000344146	2.16765	0.538348	-0.136817	0.110201	0.340266
AFAP1	Inverse variance weighted	74	-0.0302195	0.0208572	0.970233	0.931369	1.01072	0.147373	54.424	0.948965	-0.012456	0.0105999	0.243826
AFAP1L2	Inverse variance weighted	11	-0.245942	0.148075	0.781968	0.584985	1.04528	0.0967273	11.6701	0.307739	-0.0646025	0.0465704	0.198768
AFF3	Inverse variance weighted	27	0.0102501	0.0615648	1.0103	0.895461	1.13987	0.86777	18.2258	0.867404	-0.0124045	0.0237455	0.605996
AFF4	Inverse variance weighted	7	-0.228812	0.145288	0.795478	0.598352	1.05755	0.115284	4.51483	0.607362	0.0109929	0.0423909	0.805726
AFG3L1P	Inverse variance weighted	11	-0.15809	0.0976056	0.853773	0.705113	1.03377	0.1053	11.0935	0.35028	-0.0286184	0.0302072	0.368176
AFG3L2	Inverse variance weighted	3	-0.135221	0.246384	0.873522	0.538949	1.4158	0.583127	0.442141	0.80166	-0.0479792	0.0951887	0.702777
AFMID	Inverse variance weighted	2	-0.0643317	0.246012	0.937694	0.578963	1.5187	0.793709	NA	NA	NA	NA	NA
AGA	Inverse variance weighted	73	-0.0858108	0.0272318	0.917768	0.870067	0.968084	0.00162645	60.45	0.832232	-0.00567916	0.00990776	0.568318
AGAP1	Inverse variance weighted	26	-0.00341754	0.0671496	0.996588	0.873689	1.13678	0.95941	19.0125	0.796519	0.00228858	0.0198383	0.909118
AGAP3	Inverse variance weighted	25	0.0503924	0.0620976	1.05168	0.931165	1.1878	0.417077	26.8157	0.313115	0.031262	0.0188117	0.110116
AGAP4	Inverse variance weighted	37	0.00792029	0.0234626	1.00795	0.962649	1.05539	0.735687	31.9775	0.660395	0.0172759	0.0251259	0.496255
AGAP6	Inverse variance weighted	19	0.0584267	0.0298212	1.06017	0.999977	1.12398	0.0500859	18.4925	0.423677	0.00931834	0.0236215	0.698128
AGAP7	Inverse variance weighted	13	-0.00618134	0.0313141	0.993838	0.934674	1.05675	0.843516	12.8185	0.382373	0.00844493	0.0338475	0.807572
AGAP8	Inverse variance weighted	9	-0.0089687	0.0303522	0.991071	0.933832	1.05182	0.767621	5.84231	0.66489	0.0253537	0.0300455	0.42665
AGAP9	Inverse variance weighted	6	0.160523	0.0579462	1.17413	1.04807	1.31534	0.00560194	3.23344	0.664046	0.0043933	0.0520318	0.936768
AGER	Inverse variance weighted	15	-0.103003	0.102827	0.902124	0.737459	1.10356	0.316481	18.9206	0.168004	-0.0490051	0.0367262	0.204996
AGFG1	Inverse variance weighted	8	0.131291	0.137867	1.1403	0.870291	1.49408	0.340944	4.60266	0.708322	0.0137882	0.0443801	0.76655
AGGF1	Inverse variance weighted	3	0.274592	0.292172	1.31599	0.742253	2.33322	0.347304	1.30209	0.5215	0.182858	0.164579	0.466537
AGK	Inverse variance weighted	9	0.18446	0.142004	1.20257	0.910403	1.5885	0.193952	7.88744	0.444542	-0.0329521	0.0361933	0.392857
AGL	Inverse variance weighted	5	-0.299028	0.237321	0.741539	0.465717	1.18072	0.207664	8.01617	0.0909878	-0.0690964	0.112376	0.582135
AGMAT	Inverse variance weighted	2	-0.06928	0.473748	0.933065	0.36868	2.36142	0.883733	NA	NA	NA	NA	NA
AGMO	Inverse variance weighted	8	0.110069	0.122905	1.11635	0.877371	1.42043	0.37049	3.7902	0.8036	-0.00107936	0.0315483	0.973817
AGPAT1	Inverse variance weighted	4	-0.33749	0.130143	0.713559	0.552904	0.920895	0.00950826	2.64631	0.449428	-0.0495875	0.047563	0.406613
AGPAT2	Inverse variance weighted	3	-0.0505853	0.244074	0.950673	0.589212	1.53388	0.835811	0.140794	0.932024	0.00871847	0.0509349	0.892076
AGPAT3	Inverse variance weighted	9	-0.103211	0.193461	0.901937	0.617304	1.31781	0.593689	9.90784	0.271554	0.00186655	0.0504692	0.97153
AGPAT4	Inverse variance weighted	9	-0.137113	0.157954	0.871872	0.639734	1.18824	0.385363	1.97015	0.981913	-0.0150202	0.0485051	0.765833
AGPAT5	Inverse variance weighted	12	0.163311	0.118463	1.1774	0.933442	1.48512	0.168022	5.07569	0.927445	-0.0176347	0.0309592	0.581511
AGPAT6	Inverse variance weighted	6	-0.218381	0.140722	0.803819	0.610061	1.05912	0.120696	4.94411	0.422739	0.0599504	0.13984	0.690215
AGPAT9	Inverse variance weighted	18	-0.0202648	0.0795356	0.979939	0.838488	1.14525	0.798886	8.80391	0.946213	0.0151726	0.0257989	0.564668
AGPS	Inverse variance weighted	13	-0.0340596	0.0906368	0.966514	0.809201	1.15441	0.70708	13.0438	0.365864	-0.0327283	0.0286352	0.27733
AGRP	Inverse variance weighted	2	-0.363802	0.237137	0.695028	0.436664	1.10626	0.124994	NA	NA	NA	NA	NA
AGTPBP1	Inverse variance weighted	20	0.0068382	0.0850669	1.00686	0.852235	1.18954	0.93593	9.51938	0.963823	-0.00268804	0.0239507	0.911881
AGTRAP	Inverse variance weighted	11	-0.0230309	0.0845579	0.977232	0.827982	1.15339	0.785339	10.7981	0.373463	-0.0442538	0.0259613	0.122463
AGXT2L2	Inverse variance weighted	5	0.24629	0.197759	1.27927	0.868214	1.88494	0.212982	4.75186	0.313719	0.0903573	0.0791328	0.336402
AHCTF1	Inverse variance weighted	20	-0.125288	0.0655779	0.882243	0.775831	1.00325	0.0560669	15.2711	0.705217	0.0109997	0.0187161	0.564025
AHCYL2	Inverse variance weighted	10	-0.00314793	0.140948	0.996857	0.756232	1.31405	0.982182	9.15828	0.422794	-0.016324	0.0373312	0.673475
AHCYP1	Inverse variance weighted	3	0.00852991	0.109975	1.00857	0.813003	1.25117	0.938176	0.802324	0.669541	0.0421916	0.0556747	0.587159
AHI1	Inverse variance weighted	53	0.0251651	0.0263696	1.02548	0.973829	1.07988	0.33992	40.5146	0.875974	0.0111638	0.0134742	0.41123
AHNAK	Inverse variance weighted	8	-0.0712848	0.153987	0.931197	0.688597	1.25927	0.643416	8.24084	0.311837	-0.0488083	0.0477369	0.346013
AHR	Inverse variance weighted	24	0.0403926	0.0718084	1.04122	0.904519	1.19858	0.573771	17.758	0.770481	-0.0309375	0.0175296	0.0914662
AHRR	Inverse variance weighted	11	0.0142562	0.12043	1.01436	0.801086	1.28441	0.905769	7.4796	0.679523	-0.0119717	0.0338623	0.731823
AHSA2	Inverse variance weighted	53	0.0740374	0.031026	1.07685	1.01331	1.14436	0.0170186	69.1896	0.0555957	0.00829065	0.0167101	0.621923
AHSP	Inverse variance weighted	8	-0.521082	0.149123	0.593877	0.443364	0.795487	0.000475302	7.6564	0.363865	-0.0743651	0.0387752	0.103574
AIF1	Inverse variance weighted	13	0.0510362	0.0901734	1.05236	0.881876	1.2558	0.571408	20.7665	0.0539067	-0.0196013	0.0360654	0.597632
AIF1L	Inverse variance weighted	5	0.223597	0.190296	1.25057	0.861239	1.81589	0.239996	3.15377	0.53243	-0.147624	0.176751	0.464891
AIFM2	Inverse variance weighted	16	-0.295219	0.0921183	0.744368	0.621406	0.891663	0.00135164	11.8064	0.69362	-0.0316862	0.0249996	0.225664
AIFM3	Inverse variance weighted	13	0.00720042	0.106516	1.00723	0.817446	1.24107	0.946104	15.4958	0.215435	0.0399715	0.0349021	0.276414
AIG1	Inverse variance weighted	17	0.053612	0.0903161	1.05508	0.883903	1.2594	0.552777	19.057	0.265716	-0.00332078	0.0243098	0.893162
AIM1	Inverse variance weighted	13	-0.331388	0.107828	0.717927	0.58116	0.88688	0.00211696	13.632	0.324822	-0.020142	0.0330269	0.554339
AIM1L	Inverse variance weighted	4	-0.270132	0.227453	0.763279	0.488732	1.19205	0.234977	1.55213	0.670292	-0.0713142	0.0586086	0.347787
AIM2	Inverse variance weighted	11	-0.00231196	0.106513	0.997691	0.809712	1.22931	0.982682	9.1043	0.522235	0.0196562	0.0281365	0.502451
AIMP1	Inverse variance weighted	2	-0.397836	0.300487	0.671772	0.372771	1.2106	0.185513	NA	NA	NA	NA	NA
AIMP2	Inverse variance weighted	22	0.0109023	0.0755581	1.01096	0.871803	1.17233	0.885271	24.2394	0.281605	0.047555	0.0233537	0.055181
AIP	Inverse variance weighted	4	-0.494368	0.211201	0.609956	0.4032	0.922734	0.0192453	0.130738	0.987909	0.00687103	0.099106	0.951035
AJAP1	Inverse variance weighted	6	-0.260224	0.265448	0.770879	0.458176	1.297	0.326929	7.14698	0.209937	-0.0323631	0.0894302	0.735748
AK1	Inverse variance weighted	11	0.0819202	0.0665613	1.08537	0.952619	1.23662	0.218417	6.17669	0.800206	-0.0473655	0.0299733	0.148506
AK2	Inverse variance weighted	7	0.0378475	0.225881	1.03857	0.667057	1.617	0.866934	16.0795	0.0133338	0.0452805	0.0478797	0.38772
AK3	Inverse variance weighted	27	0.0290386	0.0575993	1.02946	0.919564	1.1525	0.614157	41.1718	0.0298208	-0.00514959	0.0190953	0.789621
AK3P3	Inverse variance weighted	6	0.0275238	0.0718361	1.02791	0.892905	1.18332	0.70161	7.33117	0.197153	0.00149218	0.0673322	0.983381
AK4	Inverse variance weighted	8	-0.103791	0.122863	0.901414	0.708502	1.14685	0.398241	5.54663	0.593566	0.0271983	0.0510331	0.613218
AK5	Inverse variance weighted	30	-0.0389367	0.0522361	0.961812	0.868212	1.0655	0.456031	28.8918	0.470711	-0.0143995	0.0156284	0.364729
AK8	Inverse variance weighted	4	-0.368434	0.192499	0.691817	0.474387	1.0089	0.0556261	1.27068	0.736108	0.030458	0.0537912	0.628303
AKAP1	Inverse variance weighted	3	-0.257522	0.223991	0.772965	0.498305	1.19902	0.250269	0.20197	0.903947	-0.00551515	0.0652813	0.946344
AKAP10	Inverse variance weighted	57	-0.0830556	0.0331	0.9203	0.86249	0.981985	0.0120993	72.5351	0.0678097	-0.0139275	0.0135211	0.307491
AKAP11	Inverse variance weighted	14	-0.0846725	0.118192	0.918813	0.72882	1.15834	0.473746	8.1422	0.834215	-0.0209457	0.0262904	0.441101
AKAP12	Inverse variance weighted	4	0.903785	0.259033	2.46893	1.48599	4.10206	0.000484698	0.679523	0.878009	0.0344772	0.0441705	0.516784
AKAP13	Inverse variance weighted	20	-0.125462	0.0880215	0.882089	0.742313	1.04818	0.154053	24.6251	0.173257	-0.0309502	0.0223234	0.182545
AKAP3	Inverse variance weighted	8	0.0259668	0.144657	1.02631	0.772934	1.36274	0.857541	5.83201	0.559496	-0.00946355	0.0312952	0.772559
AKAP6	Inverse variance weighted	6	0.0362201	0.163812	1.03688	0.752126	1.42945	0.825009	7.42561	0.190862	0.010427	0.0608883	0.872343
AKAP7	Inverse variance weighted	49	0.025894	0.0555134	1.02623	0.920432	1.14419	0.640896	69.5141	0.0227854	0.0131183	0.0189946	0.493191
AKD1	Inverse variance weighted	19	-0.0638935	0.07155	0.938105	0.815355	1.07933	0.371862	19.4955	0.361927	-0.00569557	0.0234649	0.811121
AKIP1	Inverse variance weighted	60	0.0101488	0.0345811	1.0102	0.943999	1.08104	0.769157	61.0506	0.402117	-0.0117621	0.0138262	0.398427
AKIRIN1	Inverse variance weighted	5	0.0351989	0.166712	1.03583	0.747099	1.43613	0.832781	0.394802	0.9829	0.0117898	0.0569007	0.849121
AKIRIN2	Inverse variance weighted	5	-0.326707	0.208441	0.721295	0.479385	1.08528	0.117024	7.04234	0.133668	-0.0430903	0.0380125	0.339366
AKNA	Inverse variance weighted	16	0.157896	0.09417	1.17104	0.973676	1.40842	0.0935978	10.9619	0.755288	-0.0132205	0.0259082	0.617805
AKR1A1	Inverse variance weighted	2	-0.803816	0.293114	0.447618	0.252002	0.79508	0.00610042	NA	NA	NA	NA	NA
AKR1B1	Inverse variance weighted	33	-0.0121718	0.0645229	0.987902	0.870544	1.12108	0.850373	38.7693	0.190785	0.00262024	0.0218482	0.905313
AKR1C1	Inverse variance weighted	14	-0.0336878	0.0867269	0.966873	0.815729	1.14602	0.697694	8.2151	0.82931	-0.0236685	0.0322879	0.477606
AKR1C2	Inverse variance weighted	47	-0.0604317	0.0338895	0.941358	0.880861	1.00601	0.0745541	38.6899	0.769189	0.000977745	0.0108685	0.928717
AKR1C3	Inverse variance weighted	20	-0.0255561	0.0633381	0.974768	0.860967	1.10361	0.68659	10.9965	0.923957	0.00774197	0.0243661	0.754343
AKR1C4	Inverse variance weighted	4	-0.386371	0.380747	0.679518	0.322183	1.43318	0.310215	5.10547	0.164235	0.000584389	0.107098	0.996142
AKR1C7P	Inverse variance weighted	16	-0.0298974	0.0353384	0.970545	0.905597	1.04015	0.397535	10.0672	0.81549	0.0407346	0.0302358	0.199308
AKR1CL1	Inverse variance weighted	5	-0.16464	0.205883	0.848199	0.566561	1.26984	0.423896	6.04505	0.195809	-0.0068339	0.0645352	0.92235
AKR1D1P1	Inverse variance weighted	2	0.153711	0.124847	1.16615	0.913028	1.48946	0.218249	NA	NA	NA	NA	NA
AKR1E2	Inverse variance weighted	15	-0.0570653	0.0973272	0.944532	0.780495	1.14305	0.557658	13.589	0.480758	0.00460199	0.0253323	0.858648
AKR7A2	Inverse variance weighted	29	0.0216428	0.0776943	1.02188	0.877535	1.18996	0.78058	46.9681	0.0138057	0.0200237	0.0228184	0.387944
AKR7A3	Inverse variance weighted	13	0.042905	0.132844	1.04384	0.804552	1.35429	0.746716	7.16339	0.84663	0.0126577	0.0271412	0.650054
AKT1	Inverse variance weighted	15	0.222623	0.0771717	1.24935	1.07397	1.45336	0.00391702	8.54398	0.859108	-0.0249374	0.0241224	0.320085
AKT2	Inverse variance weighted	2	0.0320562	0.336074	1.03258	0.53438	1.99523	0.924009	NA	NA	NA	NA	NA
AKT3	Inverse variance weighted	4	-0.172854	0.226111	0.841261	0.540083	1.31039	0.444591	1.22472	0.747081	0.0762973	0.0863754	0.470243
AKTIP	Inverse variance weighted	30	0.0502521	0.0509167	1.05154	0.951663	1.16189	0.323668	46.9411	0.0188754	0.0295157	0.0223773	0.197854
AL022344.7	Inverse variance weighted	5	-0.0994772	0.0810832	0.905311	0.772286	1.06125	0.219878	5.16912	0.27038	-0.0288548	0.0753047	0.72713
AL031663.2	Inverse variance weighted	7	0.0045501	0.109886	1.00456	0.809914	1.24599	0.966971	3.94541	0.684064	0.00577603	0.0366226	0.880851
AL049840.1	Inverse variance weighted	20	-0.0201321	0.0366487	0.980069	0.912138	1.05306	0.582782	10.0244	0.952341	0.0439936	0.0346652	0.22057
AL133216.1	Inverse variance weighted	2	0.0539242	0.0650944	1.0554	0.928987	1.19903	0.407444	NA	NA	NA	NA	NA
AL133458.1	Inverse variance weighted	50	-0.0347318	0.0211741	0.965864	0.9266	1.00679	0.100944	48.067	0.510905	-0.00166919	0.013793	0.904183
AL135998.1	Inverse variance weighted	6	0.0603887	0.0671824	1.06225	0.931193	1.21175	0.368718	4.12983	0.530879	0.0310306	0.0500456	0.568804
AL137059.1	Inverse variance weighted	2	-0.30165	0.127164	0.739597	0.576436	0.948941	0.0176856	NA	NA	NA	NA	NA
AL137145.1	Inverse variance weighted	14	-0.0572008	0.0834199	0.944404	0.801954	1.11216	0.492904	13.5932	0.403106	0.0481968	0.0247183	0.074948
AL161915.1	Inverse variance weighted	11	-0.0417438	0.049771	0.959115	0.869971	1.05739	0.401627	9.21895	0.511458	0.00838612	0.0236256	0.730797
AL353791.1	Inverse variance weighted	5	0.0390455	0.0357233	1.03982	0.969503	1.11523	0.274394	5.71525	0.221447	0.0802362	0.12902	0.578074
AL353898.2	Inverse variance weighted	3	0.278579	0.132053	1.32125	1.01995	1.71156	0.0348935	0.399902	0.818771	0.0963644	0.164846	0.663229
AL353898.3	Inverse variance weighted	2	-0.035395	0.297732	0.965224	0.538509	1.73007	0.905369	NA	NA	NA	NA	NA
AL357515.1	Inverse variance weighted	2	-0.178572	0.133859	0.836464	0.643434	1.0874	0.182193	NA	NA	NA	NA	NA
AL357673.1	Inverse variance weighted	5	0.105693	0.0640062	1.11148	0.980434	1.26004	0.0986802	3.04855	0.549734	-0.0134897	0.0278138	0.660886
AL359314.1	Inverse variance weighted	8	0.177938	0.0510898	1.19475	1.08091	1.32058	0.000496109	1.41301	0.985169	0.0175624	0.0537748	0.755069
AL392086.1	Inverse variance weighted	4	-0.104686	0.102165	0.900607	0.737176	1.10027	0.305516	7.16238	0.0668983	-0.0274686	0.121907	0.842657
AL450992.2	Inverse variance weighted	2	0.360129	0.252912	1.43351	0.873209	2.35334	0.154468	NA	NA	NA	NA	NA
AL512428.1	Inverse variance weighted	20	-0.0389703	0.0347871	0.961779	0.898388	1.02964	0.262606	20.6083	0.358841	-0.0122331	0.024313	0.620958
AL513344.1	Inverse variance weighted	4	0.213301	0.102621	1.23776	1.01224	1.51352	0.0376616	2.44083	0.48608	-0.0255973	0.0688523	0.745757
AL513477.1	Inverse variance weighted	8	0.0569097	0.0652962	1.05856	0.931396	1.20309	0.383447	5.49082	0.600292	0.00326236	0.0391746	0.93634
AL591845.1	Inverse variance weighted	18	-0.0677909	0.0397341	0.934456	0.864443	1.01014	0.0879866	17.3398	0.431587	-0.0156345	0.0332576	0.644625
AL592284.1	Inverse variance weighted	2	-0.0889033	0.0388602	0.914934	0.847835	0.987344	0.0221508	NA	NA	NA	NA	NA
AL645728.1	Inverse variance weighted	8	-0.0883286	0.051826	0.91546	0.827036	1.01334	0.0883194	5.17316	0.638841	-0.0321642	0.0551193	0.580788
ALAD	Inverse variance weighted	9	-0.131297	0.122396	0.876957	0.689911	1.11471	0.283393	4.33408	0.825794	-0.0406183	0.032426	0.250559
ALCAM	Inverse variance weighted	50	8.02063e-05	0.0350265	1.00008	0.933726	1.07115	0.998173	48.5007	0.493277	-0.00764007	0.0135999	0.576883
ALDH16A1	Inverse variance weighted	17	0.0761287	0.0444018	1.0791	0.98916	1.17722	0.0864296	9.71626	0.88102	-0.0187907	0.0211322	0.387934
ALDH18A1	Inverse variance weighted	10	0.277172	0.13379	1.31939	1.01506	1.71498	0.0382937	7.72655	0.56192	-0.0229912	0.0434953	0.611436
ALDH1A1	Inverse variance weighted	35	0.0137994	0.0530384	1.0139	0.913789	1.12497	0.794726	30.6341	0.633387	0.0162436	0.0144261	0.268294
ALDH1A2	Inverse variance weighted	2	0.146175	0.436697	1.1574	0.491766	2.724	0.73783	NA	NA	NA	NA	NA
ALDH1B1	Inverse variance weighted	7	0.184612	0.170614	1.20275	0.860887	1.68037	0.279234	3.22875	0.779637	-0.00900643	0.0402861	0.831946
ALDH2	Inverse variance weighted	20	0.11974	0.0700959	1.1272	0.982507	1.29321	0.0875935	16.7399	0.607486	0.00731935	0.019054	0.705376
ALDH3A2	Inverse variance weighted	10	-0.497162	0.130682	0.608255	0.470811	0.785821	0.000142164	9.87124	0.36101	-0.0539786	0.0340552	0.151619
ALDH3B1	Inverse variance weighted	10	0.344768	0.144159	1.41166	1.06419	1.87258	0.0167758	11.3104	0.255034	-0.0381156	0.060942	0.549104
ALDH4A1	Inverse variance weighted	2	-0.0691928	0.262636	0.933147	0.557686	1.56139	0.7922	NA	NA	NA	NA	NA
ALDH5A1	Inverse variance weighted	36	-0.0390224	0.0591586	0.961729	0.856438	1.07996	0.509496	48.2475	0.0672983	-0.000923655	0.0199531	0.963349
ALDH6A1	Inverse variance weighted	2	-0.465353	0.45188	0.627913	0.258971	1.52247	0.303097	NA	NA	NA	NA	NA
ALDH7A1	Inverse variance weighted	10	0.0790083	0.12897	1.08221	0.840488	1.39346	0.540134	8.1265	0.52145	0.0611749	0.0388388	0.153882
ALDH8A1	Inverse variance weighted	27	0.121715	0.061636	1.12943	1.00091	1.27446	0.0482979	28.4352	0.337383	0.0262229	0.0189643	0.178968
ALDH9A1	Inverse variance weighted	34	-0.0317855	0.0459529	0.968714	0.885278	1.06001	0.489127	47.1799	0.0522404	-0.0367298	0.0212641	0.0937529
ALDOB	Inverse variance weighted	2	-0.168895	0.23402	0.844598	0.533885	1.33614	0.470474	NA	NA	NA	NA	NA
ALDOC	Inverse variance weighted	16	-0.12645	0.0875235	0.881218	0.742304	1.04613	0.148527	21.0337	0.135757	-0.0479969	0.0364723	0.209322
ALG10	Inverse variance weighted	3	-0.0647803	0.206469	0.937273	0.62534	1.40481	0.753709	2.90064	0.234495	-0.0719896	0.207766	0.787657
ALG10B	Inverse variance weighted	4	0.142795	0.262876	1.15349	0.68905	1.93099	0.58699	1.1833	0.757012	0.0350468	0.0505813	0.560029
ALG11	Inverse variance weighted	11	-0.0697711	0.117495	0.932607	0.740773	1.17412	0.552632	5.5991	0.847746	-0.0238208	0.0267409	0.396226
ALG12	Inverse variance weighted	5	0.15682	0.149523	1.16979	0.87263	1.56813	0.294267	1.90362	0.753479	0.0179537	0.0595888	0.782867
ALG1L	Inverse variance weighted	21	-0.0399306	0.0293063	0.960856	0.90722	1.01766	0.173032	25.6023	0.179353	-0.0500395	0.0225738	0.0390414
ALG1L10P	Inverse variance weighted	6	-0.017219	0.0510452	0.982928	0.889347	1.08636	0.735869	6.25691	0.282017	-0.0337368	0.0532219	0.560592
ALG1L13P	Inverse variance weighted	27	-0.026783	0.0478321	0.973573	0.886447	1.06926	0.575522	32.0239	0.192331	-0.00661647	0.0323559	0.839626
ALG1L2	Inverse variance weighted	21	0.0376038	0.0336282	1.03832	0.972089	1.10906	0.263473	18.2248	0.5726	-0.00159078	0.0299506	0.958196
ALG1L6P	Inverse variance weighted	6	0.0481552	0.0704286	1.04933	0.914036	1.20466	0.494137	8.751	0.119418	-0.000638397	0.054267	0.991177
ALG3	Inverse variance weighted	6	-0.156498	0.191036	0.855133	0.588059	1.2435	0.412667	2.38656	0.793474	0.0584111	0.0448235	0.262479
ALG5	Inverse variance weighted	5	-0.144796	0.167678	0.865198	0.622853	1.20184	0.387841	2.79425	0.592826	-0.0485202	0.0515415	0.415958
ALG6	Inverse variance weighted	4	-0.431255	0.198353	0.649693	0.44042	0.958407	0.0296919	1.6917	0.63878	-0.0146014	0.0499617	0.797623
ALG8	Inverse variance weighted	5	0.387182	0.185482	1.47282	1.02392	2.11854	0.036849	0.872592	0.92846	-0.000703201	0.066158	0.992187
ALKBH1	Inverse variance weighted	16	0.103775	0.0935981	1.10935	0.923414	1.33273	0.267548	16.6851	0.338034	0.0122789	0.026206	0.646601
ALKBH2	Inverse variance weighted	4	0.222192	0.154673	1.24881	0.922225	1.69105	0.150851	1.54046	0.672964	0.0213086	0.0419987	0.662313
ALKBH3	Inverse variance weighted	9	-0.0891983	0.123547	0.914664	0.717953	1.16527	0.470308	8.44367	0.391373	0.0145726	0.0385381	0.716536
ALKBH5	Inverse variance weighted	8	0.0953122	0.0926704	1.1	0.917299	1.3191	0.303711	4.33149	0.740902	0.0569002	0.0378884	0.183833
ALKBH7	Inverse variance weighted	3	0.0792452	0.102289	1.08247	0.885821	1.32277	0.438505	1.39047	0.498958	0.07528	0.0672077	0.463973
ALKBH8	Inverse variance weighted	11	0.0514239	0.118875	1.05277	0.833958	1.32899	0.665315	11.3637	0.329895	-0.00380402	0.040956	0.928033
ALMS1	Inverse variance weighted	24	-0.0143951	0.0638341	0.985708	0.869784	1.11708	0.821584	27.891	0.21993	0.00620742	0.0361884	0.865375
ALMS1P	Inverse variance weighted	9	-0.137451	0.0764285	0.871577	0.750323	1.01242	0.0721085	8.64981	0.372693	-0.0774852	0.0395198	0.0907308
ALOX12	Inverse variance weighted	5	-0.200915	0.174151	0.817982	0.581439	1.15076	0.248629	5.05274	0.281929	0.0478294	0.0740387	0.564287
ALOX12P2	Inverse variance weighted	4	-0.100762	0.215379	0.904148	0.592796	1.37903	0.6399	2.02193	0.567868	0.0461744	0.0357855	0.325995
ALOX15	Inverse variance weighted	30	0.0432911	0.0527583	1.04424	0.941656	1.158	0.4119	22.0687	0.817333	0.00246564	0.0156413	0.875875
ALOX15B	Inverse variance weighted	8	-0.106345	0.134726	0.899114	0.690453	1.17084	0.429911	5.59334	0.587951	0.00673759	0.0299795	0.82964
ALOX5	Inverse variance weighted	23	0.00742004	0.0695425	1.00745	0.879077	1.15456	0.915029	17.8249	0.716318	0.020539	0.0262729	0.443082
ALOX5AP	Inverse variance weighted	27	-0.0598938	0.0442083	0.941865	0.863689	1.02712	0.175478	22.5103	0.660477	-0.00218129	0.0208919	0.917678
ALPK1	Inverse variance weighted	37	-0.109602	0.0627834	0.896191	0.792425	1.01354	0.0808611	18.3049	0.993737	-0.015987	0.0179319	0.378727
ALPK2	Inverse variance weighted	27	0.107402	0.0698008	1.11338	0.97102	1.27661	0.123881	22.1227	0.681965	-0.0211168	0.0178916	0.249004
ALPL	Inverse variance weighted	12	0.291503	0.178973	1.33844	0.94244	1.90083	0.103365	18.4755	0.0711841	-0.0141609	0.0408044	0.73575
ALS2	Inverse variance weighted	51	-0.0585778	0.0313049	0.943105	0.886978	1.00278	0.0613172	46.3051	0.622427	0.00698094	0.0101732	0.495815
ALS2CL	Inverse variance weighted	7	-0.0250176	0.184212	0.975293	0.679721	1.39939	0.891973	3.65066	0.723829	0.0246224	0.0348871	0.511845
ALS2CR12	Inverse variance weighted	9	0.161763	0.141843	1.17558	0.890253	1.55236	0.254105	5.86439	0.662419	-0.0156519	0.0355594	0.67309
ALS2CR8	Inverse variance weighted	2	-0.364201	0.370891	0.694751	0.335831	1.43727	0.326119	NA	NA	NA	NA	NA
AMACR	Inverse variance weighted	19	-0.0554852	0.0704281	0.946026	0.82405	1.08606	0.430797	8.30883	0.973676	-0.0183007	0.0184719	0.335709
AMD1	Inverse variance weighted	3	-0.461159	0.253054	0.630552	0.383988	1.03544	0.0683984	0.448584	0.799082	-0.0366099	0.0778041	0.720013
AMDHD1	Inverse variance weighted	62	0.0912695	0.0304146	1.09556	1.03216	1.16286	0.00269228	43.2085	0.958979	0.0174018	0.0118343	0.146664
AMDHD2	Inverse variance weighted	11	-0.118953	0.123471	0.88785	0.697009	1.13094	0.335345	13.6435	0.189883	0.0357627	0.0360939	0.347662
AMFR	Inverse variance weighted	60	-0.0220067	0.0365531	0.978234	0.910601	1.05089	0.547143	79.6836	0.0376936	-0.00145633	0.0149073	0.922513
AMH	Inverse variance weighted	10	0.148832	0.111107	1.16048	0.933384	1.44282	0.180399	14.2667	0.11315	-0.0160874	0.0333593	0.642549
AMICA1	Inverse variance weighted	28	0.140945	0.0552947	1.15136	1.0331	1.28316	0.0108041	29.7804	0.324111	-0.0100703	0.0182605	0.586013
AMIGO1	Inverse variance weighted	16	0.0244427	0.106076	1.02474	0.832379	1.26156	0.817761	21.3809	0.125094	0.0156383	0.0347773	0.659832
AMIGO2	Inverse variance weighted	14	-0.245926	0.116246	0.78198	0.622651	0.98208	0.0343825	4.35154	0.986845	-0.0305575	0.0321622	0.360803
AMMECR1L	Inverse variance weighted	2	-0.257285	0.36762	0.773148	0.37613	1.58923	0.484011	NA	NA	NA	NA	NA
AMOTL1	Inverse variance weighted	3	0.108808	0.179143	1.11495	0.784811	1.58396	0.543599	1.10114	0.57662	0.00842634	0.0504898	0.894723
AMPD3	Inverse variance weighted	17	0.251496	0.0915273	1.28595	1.07476	1.53862	0.00600032	7.73587	0.956343	0.0253348	0.0223199	0.274156
AMPH	Inverse variance weighted	5	0.0935552	0.246129	1.09807	0.677831	1.77885	0.703867	0.996372	0.910346	0.0654335	0.0778154	0.462152
AMT	Inverse variance weighted	25	-0.0183432	0.0533301	0.981824	0.884379	1.09001	0.73088	16.6455	0.863382	-0.0108492	0.0244984	0.662011
AMY2B	Inverse variance weighted	20	0.107594	0.0899393	1.11359	0.933618	1.32827	0.231583	28.5882	0.0727436	-0.00441382	0.0255634	0.864844
AMZ1	Inverse variance weighted	2	-0.276804	0.322506	0.758203	0.402961	1.42662	0.390732	NA	NA	NA	NA	NA
AMZ2	Inverse variance weighted	16	-0.0789404	0.045665	0.924095	0.844979	1.01062	0.0838657	14.0817	0.519341	0.0300448	0.0288327	0.315055
AMZ2P1	Inverse variance weighted	9	0.0563664	0.045588	1.05799	0.967552	1.15687	0.216298	4.11884	0.846245	0.039782	0.024404	0.147094
ANAPC13	Inverse variance weighted	51	-0.0307115	0.0380468	0.969755	0.90007	1.04484	0.419549	53.7188	0.333829	0.0127217	0.0132614	0.342116
ANAPC15	Inverse variance weighted	5	0.281356	0.10713	1.32492	1.07399	1.63449	0.00863193	3.13862	0.534902	-0.0401007	0.0805002	0.652611
ANAPC16	Inverse variance weighted	7	0.0310582	0.185943	1.03155	0.71649	1.48514	0.867346	9.24441	0.160292	0.0578621	0.0447969	0.252959
ANAPC1P1	Inverse variance weighted	2	-0.149397	0.175923	0.861227	0.610056	1.21581	0.395759	NA	NA	NA	NA	NA
ANAPC4	Inverse variance weighted	45	0.016398	0.049444	1.01653	0.922644	1.11998	0.740155	59.3376	0.0611123	0.0175224	0.0195523	0.375146
ANAPC5	Inverse variance weighted	14	0.0202522	0.104412	1.02046	0.831608	1.2522	0.846203	7.1293	0.895366	-0.0122953	0.0248043	0.629067
ANAPC7	Inverse variance weighted	5	0.473932	0.226158	1.6063	1.03114	2.50228	0.0361194	4.7247	0.316729	0.0541395	0.105416	0.642979
ANG	Inverse variance weighted	49	-0.055584	0.03759	0.945933	0.878745	1.01826	0.139223	42.2352	0.707094	0.00198052	0.0114536	0.863459
ANGEL1	Inverse variance weighted	29	-0.142184	0.0728627	0.867461	0.752018	1.00063	0.0510093	59.8787	0.000422063	0.0380671	0.0252735	0.143625
ANGEL2	Inverse variance weighted	24	-0.0861876	0.0627554	0.917422	0.811243	1.0375	0.169631	23.7071	0.420173	0.0230055	0.0179593	0.21354
ANGPT1	Inverse variance weighted	48	-0.0263334	0.0414852	0.97401	0.897947	1.05652	0.525581	32.4349	0.947668	-0.0190343	0.0142079	0.186925
ANGPT2	Inverse variance weighted	3	0.197774	0.280383	1.21869	0.703438	2.11134	0.480579	0.865296	0.648789	0.0417333	0.0633364	0.629094
ANGPTL6	Inverse variance weighted	9	0.0207678	0.0990587	1.02098	0.840812	1.23977	0.83394	5.96538	0.651111	0.0419132	0.0357476	0.279358
ANK1	Inverse variance weighted	10	-0.0204304	0.174805	0.979777	0.695553	1.38014	0.906959	16.6754	0.0540493	0.063174	0.0590785	0.316124
ANK3	Inverse variance weighted	54	-0.0923132	0.0375332	0.91182	0.847149	0.981426	0.0139127	41.118	0.882509	0.00682669	0.0133183	0.610415
ANKDD1A	Inverse variance weighted	78	-0.0674656	0.021615	0.93476	0.895986	0.975212	0.00180094	85.6854	0.23317	0.00635556	0.0140964	0.653371
ANKEF1	Inverse variance weighted	5	-0.207187	0.136097	0.812868	0.622547	1.06137	0.127921	2.07826	0.721367	0.0251595	0.0427134	0.597255
ANKH	Inverse variance weighted	23	0.00397148	0.0720607	1.00398	0.871737	1.15628	0.956048	20.7076	0.538868	0.0121603	0.0244316	0.623846
ANKIB1	Inverse variance weighted	9	-0.114728	0.0897957	0.891608	0.747719	1.06319	0.201369	8.0058	0.432903	0.0251363	0.037398	0.523059
ANKK1	Inverse variance weighted	21	-0.354207	0.108935	0.70173	0.566817	0.868755	0.00114778	35.2342	0.0188919	0.0318772	0.0281982	0.272348
ANKLE1	Inverse variance weighted	10	0.0460911	0.0910004	1.04717	0.876105	1.25164	0.612511	4.72168	0.857864	0.0165639	0.0248272	0.523439
ANKLE2	Inverse variance weighted	24	-0.046056	0.0628433	0.954989	0.844316	1.08017	0.463638	29.0976	0.177095	0.00569535	0.0270509	0.835183
ANKMY1	Inverse variance weighted	47	-0.0207958	0.0382669	0.979419	0.908647	1.0557	0.586826	43.256	0.587864	-0.00551441	0.0120339	0.648985
ANKMY2	Inverse variance weighted	10	-0.232529	0.145202	0.792527	0.596232	1.05345	0.109285	8.54307	0.480474	-0.0276691	0.0314494	0.404621
ANKRA2	Inverse variance weighted	24	0.114085	0.0653249	1.12085	0.986146	1.27395	0.0807361	16.9238	0.812974	-0.00672806	0.01691	0.694557
ANKRD10-IT1	Inverse variance weighted	5	0.131093	0.075854	1.14007	0.982573	1.32282	0.0839467	1.45158	0.835182	0.0446234	0.0525199	0.457948
ANKRD10	Inverse variance weighted	34	0.155948	0.0516684	1.16877	1.0562	1.29333	0.00254245	32.1938	0.507064	0.00503889	0.0185253	0.787369
ANKRD12	Inverse variance weighted	17	0.0158904	0.12877	1.01602	0.789387	1.30771	0.901789	7.07365	0.971815	-0.0159507	0.028169	0.579599
ANKRD13A	Inverse variance weighted	2	-0.652228	1.65205	0.520884	0.0204402	13.2738	0.692992	NA	NA	NA	NA	NA
ANKRD13C	Inverse variance weighted	6	-0.120806	0.183564	0.886206	0.618417	1.26995	0.510465	0.432779	0.994378	-0.00232014	0.0417701	0.958368
ANKRD13D	Inverse variance weighted	9	0.17011	0.133092	1.18543	0.913246	1.53875	0.201201	7.22935	0.512102	-0.00462916	0.0209451	0.83139
ANKRD16	Inverse variance weighted	3	0.164878	0.374491	1.17925	0.566021	2.45685	0.65974	0.227381	0.892534	0.0340396	0.0718666	0.718394
ANKRD18A	Inverse variance weighted	5	0.15616	0.172658	1.16901	0.833393	1.63979	0.36576	2.3836	0.665593	0.133049	0.094252	0.252901
ANKRD18EP	Inverse variance weighted	16	0.0272346	0.0388945	1.02761	0.952182	1.10901	0.483792	10.24	0.804375	-0.011768	0.0310499	0.710371
ANKRD19P	Inverse variance weighted	7	0.178281	0.149887	1.19516	0.890924	1.60329	0.234266	2.849	0.827547	-0.050257	0.0415577	0.280593
ANKRD20A11P	Inverse variance weighted	33	0.0164889	0.0530469	1.01663	0.916234	1.12802	0.755925	34.1208	0.366001	-0.0190256	0.0181987	0.303905
ANKRD22	Inverse variance weighted	5	0.273895	0.23753	1.31508	0.825585	2.09479	0.248871	8.68781	0.0693946	0.222219	0.107876	0.131502
ANKRD24	Inverse variance weighted	12	0.0493172	0.0799031	1.05055	0.898263	1.22866	0.537094	4.43159	0.955553	-0.0127283	0.0253636	0.626648
ANKRD26	Inverse variance weighted	17	-0.0598559	0.0825669	0.9419	0.801166	1.10736	0.46849	5.48396	0.992773	2.12772e-06	0.0179363	0.999907
ANKRD27	Inverse variance weighted	13	0.186801	0.102829	1.20539	0.985364	1.47454	0.0692761	18.3511	0.105439	0.0164668	0.0299513	0.593453
ANKRD28	Inverse variance weighted	28	0.212049	0.0566726	1.23621	1.10624	1.38144	0.000182821	23.7525	0.644008	0.00373173	0.0126912	0.771061
ANKRD32	Inverse variance weighted	5	-0.0670464	0.203971	0.935152	0.626987	1.39478	0.742378	2.23998	0.691718	0.029639	0.149548	0.855566
ANKRD33B	Inverse variance weighted	2	-0.0473476	0.201529	0.953756	0.642529	1.41573	0.814254	NA	NA	NA	NA	NA
ANKRD34A	Inverse variance weighted	2	-0.0917702	0.180524	0.912315	0.640442	1.2996	0.611204	NA	NA	NA	NA	NA
ANKRD34B	Inverse variance weighted	70	0.00857435	0.0355321	1.00861	0.940759	1.08136	0.809313	86.9591	0.0709315	-0.00290775	0.0120159	0.809515
ANKRD35	Inverse variance weighted	15	-0.0429773	0.0588777	0.957933	0.853527	1.07511	0.465426	19.5746	0.144134	-0.0376806	0.0369129	0.325971
ANKRD36	Inverse variance weighted	17	-0.178655	0.0699532	0.836395	0.729232	0.959305	0.0106518	12.1524	0.733427	-0.0130197	0.0188953	0.501316
ANKRD36B	Inverse variance weighted	23	0.0682567	0.0334618	1.07064	1.00268	1.14321	0.0413661	23.6799	0.364228	0.0333872	0.0201265	0.112004
ANKRD36BP1	Inverse variance weighted	2	-0.0806306	0.276341	0.922534	0.536731	1.58566	0.770455	NA	NA	NA	NA	NA
ANKRD36BP2	Inverse variance weighted	5	0.129101	0.141432	1.13781	0.862341	1.50126	0.361338	0.58028	0.96523	-0.0142703	0.027883	0.644088
ANKRD36C	Inverse variance weighted	2	-0.196862	0.527691	0.821304	0.29196	2.31038	0.709101	NA	NA	NA	NA	NA
ANKRD37	Inverse variance weighted	3	1.13043	0.556676	3.09698	1.04013	9.22126	0.0422884	4.26193	0.118723	-0.110818	0.123556	0.534567
ANKRD40	Inverse variance weighted	3	-0.266685	0.308063	0.765914	0.418747	1.4009	0.386663	3.56127	0.168531	-0.511	0.29513	0.333431
ANKRD42	Inverse variance weighted	6	0.341428	0.165914	1.40695	1.01637	1.94764	0.0396032	4.02783	0.545415	0.0171088	0.0379235	0.675265
ANKRD44	Inverse variance weighted	5	0.143185	0.200295	1.15394	0.779273	1.70875	0.474691	4.18136	0.382017	-0.0259953	0.0502947	0.640943
ANKRD50	Inverse variance weighted	20	-0.15663	0.0687164	0.855021	0.747281	0.978293	0.0226454	15.6809	0.678452	-0.0282726	0.0161269	0.0965939
ANKRD54	Inverse variance weighted	6	0.0189344	0.118679	1.01911	0.80761	1.28601	0.873241	0.352098	0.996547	-0.00135498	0.0213817	0.952512
ANKRD55	Inverse variance weighted	63	-0.158438	0.0429877	0.853476	0.784511	0.928502	0.000228108	87.5482	0.0180227	-0.0188793	0.0135759	0.169385
ANKRD6	Inverse variance weighted	12	0.0435581	0.150233	1.04452	0.778102	1.40216	0.771864	11.8209	0.377253	0.0770008	0.0407719	0.0882684
ANKRD65	Inverse variance weighted	2	0.20623	0.158393	1.22904	0.901026	1.67645	0.192913	NA	NA	NA	NA	NA
ANKRD9	Inverse variance weighted	20	-0.059908	0.0746639	0.941851	0.81363	1.09028	0.42234	24.6429	0.172635	-0.0264748	0.0252241	0.307797
ANKS1A	Inverse variance weighted	4	-0.384406	0.206951	0.680855	0.453831	1.02145	0.0632447	1.02719	0.794674	0.00501215	0.0479617	0.926306
ANKS6	Inverse variance weighted	4	-0.140296	0.289028	0.869101	0.493225	1.53143	0.627389	5.90596	0.116276	-0.130494	0.0574979	0.151288
ANKZF1	Inverse variance weighted	4	0.0823594	0.216208	1.08585	0.710768	1.65886	0.703258	1.93392	0.586235	0.166881	0.138396	0.351183
ANO10	Inverse variance weighted	13	-0.0540341	0.147938	0.9474	0.708935	1.26608	0.714926	15.3584	0.222419	0.042229	0.0512912	0.427816
ANO2	Inverse variance weighted	4	-0.559375	0.266859	0.571566	0.338775	0.96432	0.0360691	1.7378	0.628563	-0.0996312	0.0934767	0.398129
ANO5	Inverse variance weighted	13	0.173817	0.129141	1.18984	0.923764	1.53255	0.178319	17.352	0.136829	0.00134437	0.0310668	0.966259
ANO7L1	Inverse variance weighted	25	0.0101257	0.0522867	1.01018	0.91178	1.11919	0.846444	9.39808	0.996616	0.00864458	0.0201944	0.672583
ANO9	Inverse variance weighted	25	-0.0488298	0.058177	0.952343	0.849713	1.06737	0.401284	20.011	0.696152	0.0213739	0.01835	0.256043
ANP32B	Inverse variance weighted	2	-0.064085	0.188849	0.937925	0.647764	1.35806	0.73435	NA	NA	NA	NA	NA
ANP32E	Inverse variance weighted	9	-0.219649	0.144007	0.802801	0.605378	1.06461	0.127192	3.33625	0.91152	0.0133259	0.0289166	0.658891
ANPEP	Inverse variance weighted	68	0.035865	0.0293532	1.03652	0.978566	1.0979	0.221767	84.3459	0.0746214	0.0173498	0.0119964	0.15284
ANTXR2	Inverse variance weighted	15	0.212984	0.0735336	1.23736	1.07128	1.42919	0.00377448	11.4864	0.647477	0.00863567	0.0243623	0.728672
ANTXRLP1	Inverse variance weighted	5	-0.026362	0.0612162	0.973982	0.863859	1.09814	0.666732	9.66241	0.046515	-0.0874528	0.0673623	0.284996
ANXA1	Inverse variance weighted	34	-0.101547	0.049601	0.903439	0.819743	0.995681	0.0406319	39.8539	0.191524	-0.0240581	0.0216235	0.274173
ANXA11	Inverse variance weighted	34	-0.0863734	0.064191	0.917252	0.808813	1.04023	0.178442	42.2721	0.129336	-0.0151908	0.0176439	0.395663
ANXA2	Inverse variance weighted	22	0.0861428	0.0865809	1.08996	0.91984	1.29155	0.319766	18.5995	0.610813	0.012381	0.0206454	0.555441
ANXA2R	Inverse variance weighted	20	-0.0139723	0.0774222	0.986125	0.847284	1.14772	0.856785	14.3986	0.759977	0.047072	0.026983	0.0981219
ANXA3	Inverse variance weighted	17	0.0813732	0.0806686	1.08478	0.926133	1.27059	0.313102	24.6603	0.0760419	0.0295176	0.0283672	0.314565
ANXA4	Inverse variance weighted	21	0.0248935	0.0715186	1.02521	0.891114	1.17948	0.727787	18.9044	0.52805	-0.0145761	0.0265891	0.589939
ANXA5	Inverse variance weighted	62	0.000192672	0.0383418	1.00019	0.927783	1.07825	0.995991	79.0509	0.0599449	-0.00412006	0.0124714	0.742278
ANXA6	Inverse variance weighted	40	0.0858797	0.0406513	1.08968	1.00622	1.18005	0.0346356	38.2842	0.502339	0.0403245	0.0131554	0.00399038
ANXA9	Inverse variance weighted	3	0.498236	0.254599	1.64581	0.999222	2.71081	0.0503541	1.99675	0.368478	-0.0681368	0.0527057	0.419144
AOAH-IT1	Inverse variance weighted	8	-0.00980715	0.0410564	0.990241	0.913677	1.07322	0.811206	3.16346	0.86948	0.00745507	0.0225065	0.751726
AOAH	Inverse variance weighted	73	0.00253624	0.025397	1.00254	0.953857	1.05371	0.920452	60.593	0.828853	0.00105764	0.0127248	0.933992
AP000295.7	Inverse variance weighted	4	-0.00523445	0.0895272	0.994779	0.834679	1.18559	0.953376	0.765346	0.857737	0.0675894	0.121936	0.635079
AP000346.2	Inverse variance weighted	17	0.0442115	0.0365526	1.0452	0.972941	1.12283	0.226458	14.088	0.592157	0.00597539	0.0201404	0.770774
AP000347.4	Inverse variance weighted	10	-0.0300079	0.056818	0.970438	0.868167	1.08476	0.597401	12.2459	0.199801	0.0363557	0.0312043	0.277546
AP000350.4	Inverse variance weighted	28	0.00397554	0.0237246	1.00398	0.958367	1.05177	0.866921	27.6636	0.428468	-0.0164095	0.0202894	0.425985
AP000350.6	Inverse variance weighted	12	0.0158433	0.0873603	1.01597	0.856087	1.20571	0.856088	8.61135	0.657717	0.0126143	0.0264035	0.643099
AP000351.10	Inverse variance weighted	31	0.00712458	0.0223116	1.00715	0.964056	1.05217	0.749482	27.6841	0.587172	-0.00953354	0.017183	0.58327
AP000355.2	Inverse variance weighted	5	0.258555	0.109499	1.29506	1.04492	1.60508	0.0182127	4.16271	0.384433	-0.0922119	0.0685163	0.271026
AP000769.1	Inverse variance weighted	3	-0.0872054	0.175074	0.916489	0.650281	1.29168	0.61841	5.58128	0.0613818	0.124741	0.197906	0.641963
AP000783.1	Inverse variance weighted	8	0.208564	0.0965335	1.23191	1.01955	1.4885	0.0307311	0.780193	0.997641	0.00143442	0.0250894	0.956264
AP000807.1	Inverse variance weighted	13	0.0147723	0.0454498	1.01488	0.928385	1.10944	0.745162	10.1002	0.607172	0.0431599	0.0472398	0.380499
AP001007.1	Inverse variance weighted	44	0.0632266	0.038098	1.06527	0.98862	1.14786	0.0969994	35.5923	0.781379	0.0193842	0.0148847	0.199915
AP001046.5	Inverse variance weighted	6	0.0173022	0.0565196	1.01745	0.91076	1.13664	0.759507	4.88634	0.429908	0.00452574	0.0626184	0.945853
AP001053.11	Inverse variance weighted	15	0.0109639	0.0787395	1.01102	0.866437	1.17974	0.889258	19.9643	0.131271	0.0131425	0.0239249	0.592096
AP001055.6	Inverse variance weighted	2	-0.0976505	0.293707	0.906966	0.510014	1.61287	0.73953	NA	NA	NA	NA	NA
AP001062.7	Inverse variance weighted	9	0.0821639	0.0517836	1.08563	0.980854	1.20161	0.112586	5.28308	0.726935	0.0504734	0.0309542	0.147
AP001171.1	Inverse variance weighted	10	-0.0551402	0.0503626	0.946352	0.8574	1.04453	0.273576	4.47791	0.877244	-0.037199	0.0319569	0.277948
AP001189.4	Inverse variance weighted	37	0.0934685	0.0213596	1.09798	1.05296	1.14492	1.20899e-05	40.7114	0.270742	0.00360281	0.0180771	0.843179
AP001257.1	Inverse variance weighted	2	0.302622	0.386939	1.3534	0.633954	2.88932	0.43416	NA	NA	NA	NA	NA
AP001372.2	Inverse variance weighted	27	0.0149244	0.0500816	1.01504	0.920134	1.11973	0.765702	21.4209	0.719924	0.00690551	0.0170443	0.688812
AP001468.1	Inverse variance weighted	10	-0.00431621	0.0516653	0.995693	0.899802	1.1018	0.933421	2.84213	0.970226	-0.00867081	0.028984	0.772443
AP001469.9	Inverse variance weighted	20	0.0113653	0.0314154	1.01143	0.951031	1.07567	0.71752	18.2718	0.50436	0.00984813	0.0246991	0.694787
AP001610.5	Inverse variance weighted	11	0.00931847	0.0442702	1.00936	0.925472	1.10086	0.833285	6.14882	0.802609	0.0138427	0.0258724	0.60559
AP001625.6	Inverse variance weighted	7	-0.0722258	0.0586394	0.930321	0.829312	1.04363	0.218063	6.3928	0.380656	0.0463471	0.0286413	0.166546
AP001626.1	Inverse variance weighted	3	-0.0364102	0.133925	0.964245	0.741632	1.25368	0.785721	3.6504	0.161186	-0.143115	0.0763528	0.312003
AP001628.6	Inverse variance weighted	2	-0.181871	0.406664	0.833709	0.375712	1.85001	0.654711	NA	NA	NA	NA	NA
AP001816.1	Inverse variance weighted	70	0.00778668	0.0233684	1.00782	0.962698	1.05505	0.738973	65.6004	0.593774	0.012582	0.0110526	0.258959
AP002954.4	Inverse variance weighted	43	-0.0248249	0.0187369	0.975481	0.940307	1.01197	0.185198	41.0984	0.510424	-0.0311763	0.0180255	0.09123
AP003068.18	Inverse variance weighted	23	-0.0282051	0.0296034	0.972189	0.917385	1.03027	0.340708	13.8363	0.907186	-0.00315056	0.0201936	0.877509
AP003068.23	Inverse variance weighted	58	-0.0128939	0.0220787	0.987189	0.94538	1.03085	0.559221	48.2772	0.787996	0.00584725	0.0123155	0.636784
AP003774.1	Inverse variance weighted	47	-0.0264385	0.0164749	0.973908	0.942962	1.00587	0.108543	43.888	0.561122	-0.0116324	0.0146923	0.43267
AP003774.4	Inverse variance weighted	2	-0.161681	0.250463	0.850712	0.520696	1.38989	0.518584	NA	NA	NA	NA	NA
AP003774.6	Inverse variance weighted	30	-0.00521476	0.0209635	0.994799	0.954752	1.03652	0.803551	28.3599	0.498739	0.0303092	0.0205087	0.150603
AP006621.1	Inverse variance weighted	54	-0.000574017	0.0199108	0.999426	0.961175	1.0392	0.977001	36.9893	0.953544	0.0215151	0.0161384	0.188289
AP006621.5	Inverse variance weighted	39	-0.0117587	0.0245608	0.98831	0.941861	1.03705	0.63211	27.1398	0.905018	0.0213629	0.0178973	0.240217
AP006621.6	Inverse variance weighted	29	0.0221884	0.0341467	1.02244	0.956247	1.09321	0.515825	27.688	0.481072	0.0112957	0.0235395	0.635191
AP1B1	Inverse variance weighted	10	0.421284	0.18318	1.52392	1.06423	2.18216	0.0214575	15.8764	0.0695088	-0.00827943	0.0455548	0.860302
AP1G1	Inverse variance weighted	7	-0.345035	0.210851	0.708196	0.468461	1.07062	0.101758	1.38033	0.967044	0.0162467	0.0423866	0.717255
AP1G2	Inverse variance weighted	3	-0.0740599	0.114422	0.928616	0.742059	1.16207	0.517468	1.56495	0.457272	-0.0485052	0.0557883	0.544385
AP1M1	Inverse variance weighted	12	-0.0318382	0.0594297	0.968663	0.862155	1.08833	0.592146	10.4223	0.492845	0.0200462	0.0221494	0.386727
AP1M2	Inverse variance weighted	28	-0.0615861	0.0600537	0.940272	0.835862	1.05772	0.305119	17.3098	0.923201	-5.48745e-05	0.0200474	0.997837
AP1S1	Inverse variance weighted	8	-0.158154	0.12788	0.853718	0.664448	1.0969	0.216185	4.46371	0.725083	0.0195517	0.0368538	0.614804
AP1S3	Inverse variance weighted	7	-0.408442	0.150745	0.664685	0.494652	0.893166	0.00673852	2.95357	0.814651	0.022877	0.036637	0.559733
AP2A2	Inverse variance weighted	6	0.139856	0.145458	1.15011	0.864814	1.52952	0.336306	2.46829	0.781262	-0.0700377	0.054904	0.271128
AP2B1	Inverse variance weighted	9	0.125548	0.135526	1.13377	0.869286	1.47872	0.354252	10.566	0.227526	0.0333717	0.0366148	0.392376
AP2M1	Inverse variance weighted	14	-0.109401	0.0862811	0.896371	0.756909	1.06153	0.204811	13.2	0.432483	-0.0183156	0.0259555	0.493874
AP2S1	Inverse variance weighted	4	-0.354929	0.235023	0.701223	0.442385	1.11151	0.130995	0.491329	0.920792	0.0309431	0.0928128	0.770545
AP3B1	Inverse variance weighted	40	0.0137704	0.0429506	1.01387	0.932009	1.10291	0.748506	42.0521	0.340149	-0.0167993	0.0160148	0.300811
AP3B2	Inverse variance weighted	30	-0.105141	0.0592824	0.900197	0.801448	1.01111	0.0761354	17.6973	0.950209	-0.00191814	0.0145765	0.896248
AP3D1	Inverse variance weighted	8	0.0108678	0.106967	1.01093	0.819723	1.24673	0.919075	6.25686	0.510098	-0.00846894	0.0328296	0.805053
AP3M1	Inverse variance weighted	24	0.00410237	0.0557249	1.00411	0.900218	1.11999	0.941314	19.9666	0.643925	-0.00505967	0.026165	0.848439
AP3M2	Inverse variance weighted	26	0.0498409	0.0654981	1.0511	0.924469	1.19508	0.446686	26.2423	0.394759	0.00636517	0.0228986	0.783414
AP3S1	Inverse variance weighted	4	-0.460835	0.216157	0.630757	0.41292	0.963514	0.0330108	3.65186	0.301594	-0.0876214	0.0518417	0.23306
AP3S2	Inverse variance weighted	39	0.109074	0.0348449	1.11524	1.04162	1.19407	0.00174642	47.779	0.13289	0.0238899	0.0160303	0.144622
AP4B1-AS1	Inverse variance weighted	5	0.000334137	0.0829906	1.00033	0.850163	1.17703	0.996788	3.66666	0.452994	0.047394	0.0548493	0.451103
AP4B1	Inverse variance weighted	17	0.131079	0.0896662	1.14006	0.956316	1.3591	0.14378	6.70678	0.978507	-0.00273165	0.0372436	0.9425
AP4E1	Inverse variance weighted	41	0.0104276	0.0491658	1.01048	0.917652	1.1127	0.832037	45.4831	0.254346	-0.0311803	0.0138287	0.0298382
AP4M1	Inverse variance weighted	28	0.0566161	0.0617641	1.05825	0.937591	1.19444	0.359326	30.0385	0.312427	-0.0278414	0.023527	0.247366
AP5B1	Inverse variance weighted	3	-0.684094	0.345707	0.504547	0.25623	0.993512	0.0478354	0.624861	0.731666	0.0675712	0.0873175	0.580726
AP5S1	Inverse variance weighted	3	-0.162009	0.347424	0.850433	0.430435	1.68025	0.64099	3.43474	0.179538	-0.362002	0.197483	0.317932
APAF1	Inverse variance weighted	19	-0.128891	0.0847529	0.87907	0.744527	1.03793	0.128314	18.2642	0.438379	-0.010781	0.0189831	0.57751
APBA2	Inverse variance weighted	7	-0.0790674	0.176017	0.923978	0.654384	1.30464	0.653286	8.64274	0.194689	-0.029204	0.055204	0.619427
APBA3	Inverse variance weighted	11	0.148144	0.114186	1.15968	0.92713	1.45056	0.194498	5.98778	0.816289	0.0180023	0.034405	0.613439
APBB1IP	Inverse variance weighted	24	0.113582	0.0684598	1.12028	0.979611	1.28116	0.0970953	21.2395	0.566461	0.00795176	0.0168318	0.641276
APBB2	Inverse variance weighted	15	-0.0657645	0.0741716	0.936351	0.80966	1.08287	0.375265	12.2919	0.582872	-0.019774	0.0211777	0.367469
APBB3	Inverse variance weighted	13	0.205914	0.113746	1.22865	0.983117	1.5355	0.0702485	15.7308	0.20388	0.0248607	0.0295469	0.418041
APC	Inverse variance weighted	2	-0.107978	0.305352	0.897648	0.493384	1.63315	0.723626	NA	NA	NA	NA	NA
APC2	Inverse variance weighted	2	0.116601	0.162821	1.12367	0.816663	1.54609	0.473913	NA	NA	NA	NA	NA
APCDD1	Inverse variance weighted	21	-0.128525	0.0887325	0.879392	0.739012	1.04644	0.147491	10.2195	0.964015	-0.0245047	0.0213418	0.265137
APEH	Inverse variance weighted	18	-0.0310574	0.0665645	0.96942	0.850846	1.10452	0.640803	8.9147	0.9429	-0.00560977	0.0249249	0.824777
APEX1	Inverse variance weighted	8	0.155194	0.160085	1.16788	0.85336	1.59833	0.332324	9.76442	0.202321	-0.0223279	0.0442301	0.631692
APH1B	Inverse variance weighted	34	0.0361384	0.056857	1.0368	0.927464	1.15902	0.525036	33.5608	0.440103	0.0136016	0.0132913	0.31382
API5	Inverse variance weighted	4	-0.0792911	0.154633	0.923771	0.682241	1.25081	0.608113	3.19562	0.362437	0.0447303	0.0777042	0.622991
APIP	Inverse variance weighted	17	0.000224927	0.034953	1.00022	0.933996	1.07115	0.994866	21.5635	0.157853	0.00766431	0.0241941	0.755774
APITD1	Inverse variance weighted	7	-0.0489611	0.161636	0.952218	0.693663	1.30715	0.761959	14.3265	0.0261942	-0.0788518	0.0305606	0.0494215
APLF	Inverse variance weighted	2	0.195572	0.515401	1.21601	0.44281	3.33929	0.704349	NA	NA	NA	NA	NA
APLP2	Inverse variance weighted	3	-0.505317	0.491311	0.603314	0.23032	1.58036	0.303711	4.8109	0.090225	-0.533734	0.463173	0.455015
APMAP	Inverse variance weighted	17	-0.0597887	0.104892	0.941964	0.766916	1.15696	0.568677	10.4758	0.840631	-0.0197719	0.0252436	0.445673
APOA1BP	Inverse variance weighted	15	-0.350339	0.108823	0.704449	0.569138	0.871931	0.00128488	22.235	0.0739123	-0.0373147	0.0254523	0.166397
APOA2	Inverse variance weighted	7	0.0116082	0.157694	1.01168	0.742694	1.37808	0.941319	2.67186	0.84876	-0.0088188	0.0419334	0.841731
APOBEC3A	Inverse variance weighted	31	0.0336131	0.0438585	1.03418	0.948997	1.12702	0.443439	17.3309	0.96839	0.0155222	0.0127082	0.231762
APOBEC3B	Inverse variance weighted	6	-0.0375027	0.0965613	0.963192	0.79711	1.16388	0.697733	1.29028	0.935928	0.00153981	0.0428313	0.973044
APOBEC3C	Inverse variance weighted	24	0.061821	0.0645407	1.06377	0.937369	1.20722	0.338133	26.0255	0.299666	0.00513565	0.0219085	0.816832
APOBEC3D	Inverse variance weighted	10	-0.0344195	0.082029	0.966166	0.822673	1.13469	0.674776	11.4703	0.244842	0.0210129	0.0425238	0.634485
APOBEC3F	Inverse variance weighted	3	0.0993811	0.178958	1.10449	0.777729	1.56853	0.578668	0.532779	0.76614	-0.0301782	0.0531313	0.671153
APOBEC3G	Inverse variance weighted	17	0.0710563	0.0616186	1.07364	0.951499	1.21146	0.248844	8.88546	0.918055	-0.000978244	0.0153404	0.949996
APOBEC3H	Inverse variance weighted	16	0.0647064	0.0652174	1.06685	0.938831	1.21232	0.321117	14.3959	0.495743	0.0127122	0.0177659	0.48604
APOBR	Inverse variance weighted	7	-0.0239601	0.096221	0.976325	0.808517	1.17896	0.803352	3.69063	0.718459	0.0120873	0.0401892	0.775703
APOD	Inverse variance weighted	2	-0.118841	0.246021	0.887949	0.548241	1.43815	0.629059	NA	NA	NA	NA	NA
APOL1	Inverse variance weighted	4	0.0260292	0.224994	1.02637	0.660368	1.59523	0.907899	4.97027	0.173987	-0.126759	0.0654779	0.192511
APOL2	Inverse variance weighted	4	0.122313	0.182644	1.13011	0.790042	1.61655	0.503063	3.27362	0.351332	-0.0331082	0.0506341	0.580329
APOL3	Inverse variance weighted	10	-0.253799	0.164595	0.775848	0.561915	1.07123	0.123084	3.69899	0.930085	0.0148791	0.0426381	0.736125
APOL4	Inverse variance weighted	6	-0.30646	0.165607	0.736048	0.532033	1.01829	0.0642375	0.540064	0.990583	-0.00132629	0.0415415	0.97606
APOL6	Inverse variance weighted	3	-0.0508464	0.163356	0.950425	0.690028	1.30909	0.755602	0.845451	0.655259	0.0381124	0.0541205	0.609403
APOLD1	Inverse variance weighted	15	-0.0216028	0.0999005	0.978629	0.804602	1.1903	0.828798	14.794	0.392381	0.037074	0.0265388	0.185811
APP	Inverse variance weighted	16	0.265426	0.09353	1.30399	1.08557	1.56634	0.00454158	10.0993	0.813445	-0.00348434	0.0248077	0.890302
APPL2	Inverse variance weighted	41	-0.114826	0.0549208	0.891521	0.800538	0.992844	0.0365494	49.991	0.133762	-0.0287294	0.0165547	0.0905626
APRT	Inverse variance weighted	11	-0.00105623	0.100596	0.998944	0.820186	1.21666	0.991623	7.77304	0.650995	0.0160039	0.0287867	0.591798
APTX	Inverse variance weighted	17	-0.00422206	0.0871952	0.995787	0.839352	1.18138	0.961381	12.2688	0.725277	-0.0296296	0.0291561	0.325628
AQP1	Inverse variance weighted	2	-0.00418206	0.28171	0.995827	0.573307	1.72974	0.988156	NA	NA	NA	NA	NA
AQP10	Inverse variance weighted	19	0.0349782	0.0629333	1.0356	0.915421	1.17155	0.57835	21.926	0.235286	0.00562986	0.0211361	0.793164
AQP11	Inverse variance weighted	2	0.257638	0.351142	1.29387	0.650118	2.57507	0.463123	NA	NA	NA	NA	NA
AQP3	Inverse variance weighted	11	0.151132	0.161361	1.16315	0.847778	1.59584	0.348963	14.0536	0.170561	0.0616824	0.053065	0.274971
AQP9	Inverse variance weighted	8	-0.0477114	0.172248	0.953409	0.680235	1.33629	0.781786	3.70234	0.813352	0.0209666	0.0336124	0.555732
AQR	Inverse variance weighted	2	0.186612	0.49819	1.20516	0.453917	3.19973	0.707973	NA	NA	NA	NA	NA
ARAP1-AS2	Inverse variance weighted	3	0.0465129	0.120861	1.04761	0.82665	1.32764	0.70035	2.28383	0.319207	-0.193885	0.27445	0.608452
ARAP1	Inverse variance weighted	3	0.567857	0.267995	1.76448	1.04351	2.98359	0.034098	0.0479381	0.976316	-0.0109882	0.110215	0.936739
ARAP2	Inverse variance weighted	10	-0.0378806	0.118571	0.962828	0.763166	1.21473	0.749366	8.88972	0.447516	-0.00720742	0.020305	0.731798
ARAP3	Inverse variance weighted	53	0.126113	0.0421435	1.13441	1.04447	1.23209	0.00276728	62.1598	0.158096	0.00573277	0.0150182	0.704254
ARC	Inverse variance weighted	9	-0.0884075	0.18695	0.915388	0.634557	1.3205	0.636288	13.8426	0.085962	0.0417306	0.0534212	0.460306
ARCN1	Inverse variance weighted	10	0.255425	0.123761	1.29101	1.01294	1.64542	0.0390311	4.04238	0.908601	0.0232991	0.0255475	0.388429
ARF1	Inverse variance weighted	2	0.378877	0.453559	1.46064	0.600437	3.55321	0.403525	NA	NA	NA	NA	NA
ARF3	Inverse variance weighted	30	0.101977	0.0508596	1.10736	1.0023	1.22343	0.0449553	25.751	0.638765	0.0136128	0.0146453	0.360574
ARF4	Inverse variance weighted	12	-0.0322962	0.100434	0.96822	0.795212	1.17887	0.747781	10.5957	0.477727	0.0319085	0.0180604	0.107717
ARF5	Inverse variance weighted	2	-0.055888	0.395148	0.945645	0.435884	2.05156	0.887526	NA	NA	NA	NA	NA
ARFGAP1	Inverse variance weighted	2	0.116226	0.177706	1.12325	0.792884	1.59126	0.51309	NA	NA	NA	NA	NA
ARFGAP2	Inverse variance weighted	5	-0.509745	0.196871	0.600649	0.408358	0.883487	0.00961879	3.80179	0.433494	-0.0492617	0.0451793	0.3553
ARFGAP3	Inverse variance weighted	15	-0.168964	0.105338	0.844539	0.686996	1.03821	0.108711	15.5961	0.338656	-0.0120906	0.0273975	0.666245
ARFGEF1	Inverse variance weighted	2	-0.0576172	0.418247	0.944011	0.415871	2.14287	0.890431	NA	NA	NA	NA	NA
ARFGEF2	Inverse variance weighted	11	0.108	0.125246	1.11405	0.871551	1.42402	0.388517	10.0683	0.434526	0.0236242	0.034772	0.513975
ARFIP1	Inverse variance weighted	58	0.0766774	0.0313756	1.07969	1.0153	1.14817	0.0145313	47.7702	0.80309	0.0114481	0.0140524	0.418711
ARG1	Inverse variance weighted	40	0.0157326	0.050577	1.01586	0.919985	1.12172	0.755754	52.2668	0.0759409	-0.0111408	0.0168737	0.513081
ARGLU1	Inverse variance weighted	3	-0.00341568	0.298451	0.99659	0.555226	1.78881	0.990869	0.853829	0.652519	-0.0706457	0.0767004	0.526145
ARHGAP1	Inverse variance weighted	6	0.576951	0.250677	1.7806	1.0894	2.91037	0.0213595	5.29218	0.381272	-0.0725797	0.0560523	0.265055
ARHGAP10	Inverse variance weighted	10	-0.0758696	0.149263	0.926937	0.691823	1.24195	0.611246	4.86784	0.845673	0.0131928	0.0398963	0.749382
ARHGAP11A	Inverse variance weighted	9	-0.0482164	0.0803186	0.952928	0.814125	1.11539	0.548297	5.82617	0.666696	0.0183957	0.0238778	0.466257
ARHGAP12	Inverse variance weighted	31	0.172347	0.0607964	1.18809	1.05463	1.33844	0.00458498	16.1424	0.981505	-0.00739605	0.0167745	0.662547
ARHGAP15	Inverse variance weighted	52	0.047346	0.0384433	1.04848	0.972386	1.13054	0.218107	46.6592	0.646574	0.0106986	0.0167509	0.525941
ARHGAP17	Inverse variance weighted	3	-0.0337038	0.278821	0.966858	0.55979	1.66994	0.903787	0.563471	0.754473	0.00367338	0.191928	0.987817
ARHGAP18	Inverse variance weighted	5	-0.169821	0.209959	0.843816	0.559148	1.27341	0.418614	3.42172	0.48988	0.101866	0.0742944	0.263903
ARHGAP19	Inverse variance weighted	39	-0.0927773	0.0429101	0.911396	0.837879	0.991364	0.0306079	43.6298	0.244451	-0.0178391	0.0146764	0.231877
ARHGAP21	Inverse variance weighted	10	-0.0805299	0.106	0.922627	0.749544	1.13568	0.447424	3.08098	0.960998	0.0236354	0.0590718	0.699544
ARHGAP22	Inverse variance weighted	32	0.103215	0.0555514	1.10873	0.99435	1.23627	0.063168	42.3578	0.0839654	0.00571876	0.0191549	0.767339
ARHGAP23	Inverse variance weighted	2	0.374538	0.364767	1.45432	0.711483	2.97273	0.30452	NA	NA	NA	NA	NA
ARHGAP24	Inverse variance weighted	29	-0.0183274	0.0551596	0.98184	0.881227	1.09394	0.739692	24.9237	0.631986	-0.0256342	0.0180155	0.166217
ARHGAP25	Inverse variance weighted	11	-0.353671	0.139725	0.702106	0.533907	0.923292	0.0113676	14.2689	0.161075	-0.0473948	0.0424564	0.293202
ARHGAP26	Inverse variance weighted	8	0.21573	0.199269	1.24077	0.839594	1.83363	0.278983	10.588	0.157625	-0.0321992	0.052945	0.565374
ARHGAP27	Inverse variance weighted	38	-0.0932936	0.0460886	0.910926	0.832246	0.997044	0.0429473	42.715	0.238982	-0.00761541	0.0162775	0.642713
ARHGAP31	Inverse variance weighted	9	-0.0556388	0.142594	0.945881	0.715249	1.25088	0.696397	13.2758	0.102707	0.0571462	0.0355638	0.152119
ARHGAP32	Inverse variance weighted	27	-0.0141704	0.07851	0.98593	0.845312	1.14994	0.856767	18.9535	0.838389	-0.0130979	0.0198887	0.516197
ARHGAP33	Inverse variance weighted	42	0.0904724	0.0531743	1.09469	0.986345	1.21494	0.0888624	55.3405	0.0666526	0.0118569	0.0147654	0.426712
ARHGAP35	Inverse variance weighted	2	-0.209981	0.29275	0.8106	0.45668	1.4388	0.473208	NA	NA	NA	NA	NA
ARHGAP39	Inverse variance weighted	5	0.224794	0.215465	1.25206	0.820765	1.91	0.296812	6.59522	0.158889	0.0330294	0.192254	0.874529
ARHGAP42	Inverse variance weighted	5	0.488605	0.2646	1.63004	0.970435	2.73798	0.0648081	1.44346	0.836607	-0.0392896	0.0536672	0.517118
ARHGAP44	Inverse variance weighted	6	0.0241188	0.0753047	1.02441	0.883841	1.18734	0.748754	6.12518	0.294228	0.00865316	0.0285256	0.776749
ARHGAP5	Inverse variance weighted	13	0.0698736	0.114907	1.07237	0.85612	1.34325	0.543131	11.7486	0.466079	0.0610041	0.0269645	0.0449034
ARHGAP9	Inverse variance weighted	15	0.0748838	0.0685419	1.07776	0.942275	1.23272	0.274602	11.2506	0.666247	0.0419667	0.0198354	0.0542383
ARHGDIB	Inverse variance weighted	5	0.147262	0.37803	1.15866	0.552293	2.43075	0.696869	10.2481	0.0364499	0.156747	0.181706	0.451781
ARHGEF10	Inverse variance weighted	52	0.046412	0.0343179	1.04751	0.979365	1.12039	0.176242	50.0542	0.511192	-0.0202585	0.0123319	0.106705
ARHGEF11	Inverse variance weighted	13	-0.220298	0.101216	0.80228	0.657914	0.978324	0.029517	12.2768	0.423717	0.0262125	0.0239321	0.296793
ARHGEF17	Inverse variance weighted	22	-0.114957	0.0481667	0.891405	0.8111	0.979659	0.0170027	19.956	0.524047	-0.00906804	0.0156005	0.567554
ARHGEF18	Inverse variance weighted	16	-0.0156944	0.0931891	0.984428	0.820087	1.1817	0.866257	19.5238	0.190972	-0.0174105	0.0223388	0.448728
ARHGEF19	Inverse variance weighted	44	-0.0115299	0.0415908	0.988536	0.91115	1.0725	0.781609	22.2159	0.99636	0.0104005	0.0149617	0.490797
ARHGEF3	Inverse variance weighted	20	-0.196512	0.0986078	0.821591	0.677203	0.996764	0.0462759	28.5096	0.0741	-0.0332909	0.0261451	0.219106
ARHGEF35	Inverse variance weighted	14	-0.0377725	0.0565027	0.962932	0.861985	1.0757	0.503809	8.47589	0.811276	-0.0109636	0.0213409	0.616763
ARHGEF37	Inverse variance weighted	2	-1.15163	0.524683	0.316121	0.113041	0.88404	0.0281701	NA	NA	NA	NA	NA
ARHGEF39	Inverse variance weighted	8	0.109265	0.151046	1.11546	0.829621	1.49977	0.469443	3.50402	0.8348	-0.0293094	0.044589	0.53536
ARHGEF40	Inverse variance weighted	6	0.0665343	0.148847	1.0688	0.798352	1.43086	0.654876	5.85227	0.320861	-0.0359561	0.0325046	0.330696
ARHGEF5	Inverse variance weighted	3	0.0143993	0.272114	1.0145	0.595149	1.72934	0.957798	0.138103	0.933279	0.0226117	0.0640765	0.784031
ARHGEF7	Inverse variance weighted	41	0.0230035	0.0440048	1.02327	0.938713	1.11544	0.601148	39.7947	0.479399	0.0105297	0.0140115	0.45686
ARID1A	Inverse variance weighted	18	0.0127174	0.0576399	1.0128	0.904605	1.13393	0.825376	8.68811	0.949541	0.0344887	0.0190934	0.089714
ARID3B	Inverse variance weighted	2	0.239249	0.180243	1.27029	0.892234	1.80855	0.184387	NA	NA	NA	NA	NA
ARID4A	Inverse variance weighted	2	0.482345	0.271817	1.61987	0.950834	2.75966	0.0759767	NA	NA	NA	NA	NA
ARID4B	Inverse variance weighted	2	-0.412896	0.383592	0.661731	0.312005	1.40347	0.281752	NA	NA	NA	NA	NA
ARID5A	Inverse variance weighted	16	-0.184954	0.090277	0.831143	0.696354	0.992021	0.0404878	15.922	0.387252	-0.0182463	0.0271656	0.512726
ARID5B	Inverse variance weighted	27	0.0418155	0.0585159	1.0427	0.929716	1.16942	0.474856	20.6427	0.760165	0.0108655	0.0176449	0.543603
ARIH2	Inverse variance weighted	10	-0.183341	0.144785	0.832484	0.626805	1.10566	0.205408	3.75896	0.926549	-0.00518135	0.0360383	0.889235
ARL1	Inverse variance weighted	6	-0.157636	0.22776	0.85416	0.546595	1.33479	0.488864	5.34367	0.375393	0.0620246	0.0532742	0.309028
ARL10	Inverse variance weighted	2	0.170361	0.235261	1.18573	0.747702	1.88038	0.468983	NA	NA	NA	NA	NA
ARL11	Inverse variance weighted	12	0.463702	0.134918	1.58995	1.2205	2.07123	0.000588392	6.75407	0.818635	0.0381708	0.0381308	0.340409
ARL14EP	Inverse variance weighted	21	-0.0650248	0.101402	0.937044	0.768149	1.14308	0.521354	41.5978	0.00311922	-0.0298515	0.0256174	0.258327
ARL15	Inverse variance weighted	2	0.188073	0.174011	1.20692	0.85814	1.69746	0.27978	NA	NA	NA	NA	NA
ARL16	Inverse variance weighted	35	-0.0379383	0.0298142	0.962772	0.908124	1.02071	0.203198	36.3384	0.360237	0.0117094	0.0133423	0.386498
ARL17A	Inverse variance weighted	20	-0.0545948	0.0339438	0.946869	0.885923	1.01201	0.10775	22.7992	0.246304	0.0471042	0.0273078	0.101668
ARL17B	Inverse variance weighted	27	-0.048981	0.0308169	0.952199	0.896388	1.01149	0.111965	33.2114	0.156052	0.0153245	0.0198873	0.448185
ARL2	Inverse variance weighted	8	0.222651	0.136801	1.24938	0.955541	1.63359	0.103618	2.5648	0.922139	-0.0175639	0.0486059	0.730218
ARL2BP	Inverse variance weighted	7	0.202802	0.202377	1.22483	0.823776	1.82114	0.316294	4.64613	0.589932	0.0445025	0.0430333	0.348473
ARL3	Inverse variance weighted	8	-0.0248928	0.1073	0.975414	0.790412	1.20372	0.816544	8.80012	0.267327	-0.00337607	0.0539162	0.952105
ARL4A	Inverse variance weighted	24	0.112433	0.060246	1.119	0.994366	1.25925	0.0620099	21.3228	0.561384	0.0221814	0.0202413	0.284996
ARL4C	Inverse variance weighted	26	0.0478443	0.0700369	1.04901	0.914454	1.20336	0.494524	17.5516	0.860823	0.00270186	0.0280465	0.924054
ARL4D	Inverse variance weighted	3	0.319351	0.313174	1.37623	0.744926	2.54256	0.307859	3.84869	0.145971	-0.147776	0.110501	0.408751
ARL5A	Inverse variance weighted	9	-0.0678239	0.131228	0.934425	0.722505	1.2085	0.605267	7.27024	0.507777	-0.0135759	0.0426696	0.759642
ARL5B	Inverse variance weighted	2	-0.223239	0.558466	0.799924	0.267715	2.39014	0.689351	NA	NA	NA	NA	NA
ARL6IP1	Inverse variance weighted	9	0.523547	0.130733	1.688	1.30645	2.181	6.20935e-05	15.0991	0.0572461	0.0805078	0.0561716	0.194901
ARL6IP4	Inverse variance weighted	6	-0.0915116	0.128956	0.912551	0.708741	1.17497	0.47793	1.30098	0.934831	0.0571486	0.0742698	0.484533
ARL6IP5	Inverse variance weighted	8	0.0587081	0.111203	1.06047	0.852783	1.31873	0.597545	1.89334	0.965507	-0.0240328	0.0322269	0.484007
ARL6IP6	Inverse variance weighted	2	0.210067	0.294248	1.23376	0.693046	2.19634	0.475281	NA	NA	NA	NA	NA
ARL8A	Inverse variance weighted	2	-0.149247	0.287517	0.861357	0.490279	1.51329	0.6037	NA	NA	NA	NA	NA
ARL8B	Inverse variance weighted	11	-0.0144404	0.143851	0.985663	0.743498	1.3067	0.920039	17.1069	0.0720309	0.00108759	0.0502044	0.983189
ARMC1	Inverse variance weighted	5	0.384147	0.216578	1.46836	0.960458	2.24485	0.0761105	1.98569	0.738391	-0.072622	0.0670771	0.358213
ARMC10	Inverse variance weighted	2	-0.342001	0.404304	0.710348	0.321603	1.56899	0.397609	NA	NA	NA	NA	NA
ARMC12	Inverse variance weighted	2	-0.0349164	0.295464	0.965686	0.541168	1.72322	0.905929	NA	NA	NA	NA	NA
ARMC2	Inverse variance weighted	9	-0.0463657	0.148894	0.954693	0.713054	1.27822	0.755496	4.37099	0.822197	-0.0123451	0.0381384	0.755626
ARMC3	Inverse variance weighted	10	0.252653	0.121999	1.28744	1.01363	1.63521	0.0383644	5.34932	0.802856	0.0100839	0.0354996	0.783581
ARMC5	Inverse variance weighted	9	-0.284385	0.231531	0.752477	0.47798	1.18461	0.219342	17.699	0.0236002	0.0547807	0.0588293	0.382753
ARMC7	Inverse variance weighted	16	0.123652	0.101092	1.13162	0.928218	1.3796	0.221268	5.92445	0.980989	-0.0154806	0.031791	0.633831
ARMC8	Inverse variance weighted	2	0.214153	0.421959	1.23881	0.541784	2.83259	0.61179	NA	NA	NA	NA	NA
ARNT	Inverse variance weighted	10	-0.00264977	0.127612	0.997354	0.776647	1.28078	0.983434	8.84799	0.451423	0.0202236	0.026805	0.472189
ARNT2	Inverse variance weighted	2	0.516608	0.626354	1.67633	0.491131	5.72167	0.409493	NA	NA	NA	NA	NA
ARNTL	Inverse variance weighted	48	-0.00399416	0.052029	0.996014	0.899451	1.10294	0.938808	45.624	0.529626	0.0328747	0.0144626	0.0277376
ARPC1B	Inverse variance weighted	11	-0.193131	0.107171	0.824374	0.668187	1.01707	0.0715334	7.86197	0.642317	-0.0250829	0.0359918	0.503464
ARPC3	Inverse variance weighted	9	0.0806966	0.0783265	1.08404	0.929765	1.26392	0.302888	6.75822	0.56293	-0.0347625	0.0396984	0.410251
ARPC4	Inverse variance weighted	5	-0.117146	0.27312	0.889456	0.520763	1.51918	0.667984	6.74606	0.149932	-0.157074	0.0859169	0.164964
ARPC5	Inverse variance weighted	53	0.0270384	0.0379428	1.02741	0.953773	1.10673	0.476088	59.4062	0.22391	-0.00908323	0.013931	0.517319
ARPC5L	Inverse variance weighted	2	0.0741402	0.431444	1.07696	0.462324	2.50871	0.863562	NA	NA	NA	NA	NA
ARPP19	Inverse variance weighted	13	0.223444	0.136246	1.25038	0.957338	1.63311	0.101006	20.4052	0.0597989	0.0366252	0.0288622	0.230647
ARRB1	Inverse variance weighted	14	0.0265131	0.0964193	1.02687	0.850043	1.24048	0.783334	20.2859	0.0883074	-0.0112484	0.0249033	0.659553
ARRB2	Inverse variance weighted	32	-0.0130022	0.050288	0.987082	0.894432	1.08933	0.795978	22.2034	0.876521	-0.00181936	0.0151964	0.905501
ARRDC1	Inverse variance weighted	13	-0.101021	0.102713	0.903914	0.739087	1.1055	0.32535	14.3458	0.279172	-0.016277	0.0277353	0.56914
ARRDC2	Inverse variance weighted	11	0.101794	0.0870151	1.10716	0.933554	1.31304	0.242066	6.28244	0.791002	-0.00608828	0.0228063	0.795519
ARRDC3	Inverse variance weighted	2	0.486592	0.406915	1.62676	0.732742	3.61158	0.231772	NA	NA	NA	NA	NA
ARRDC4	Inverse variance weighted	31	0.042176	0.0400505	1.04308	0.964329	1.12826	0.29231	18.6841	0.946377	0.0227225	0.0164897	0.17875
ARRDC5	Inverse variance weighted	39	0.0211796	0.0573411	1.02141	0.912827	1.1429	0.711859	60.8619	0.0106925	0.0312541	0.0219876	0.163563
ARSA	Inverse variance weighted	40	-0.123754	0.0497756	0.883597	0.801465	0.974146	0.0129102	50.6518	0.100134	-0.0194874	0.0139557	0.170705
ARSB	Inverse variance weighted	46	-0.00426371	0.0409638	0.995745	0.918923	1.07899	0.917102	44.8311	0.47905	-0.0220381	0.0143469	0.131677
ARSG	Inverse variance weighted	19	0.0602123	0.0987651	1.06206	0.875144	1.2889	0.542093	16.6904	0.544482	-0.0210181	0.0240488	0.39431
ARV1	Inverse variance weighted	25	-0.122204	0.0780268	0.884968	0.759468	1.03121	0.117305	19.6055	0.718974	-0.0243469	0.017687	0.181909
ARVCF	Inverse variance weighted	11	0.317757	0.133741	1.37404	1.0572	1.78584	0.0175059	8.80983	0.550242	0.0110972	0.0374135	0.773496
AS3MT	Inverse variance weighted	47	0.0496571	0.0422096	1.05091	0.967467	1.14155	0.239419	41.1741	0.674256	0.0328728	0.0168159	0.0568286
ASAH1	Inverse variance weighted	58	-0.0578564	0.0374678	0.943785	0.876961	1.0157	0.122548	47.7918	0.802458	-0.0117281	0.0128655	0.365893
ASAP1	Inverse variance weighted	24	0.0368128	0.052847	1.0375	0.935413	1.15073	0.486059	21.2125	0.56811	0.0121434	0.0164956	0.469413
ASAP2	Inverse variance weighted	3	0.316622	0.354584	1.37248	0.684983	2.75001	0.371889	0.02382	0.988161	0.00753399	0.0892983	0.946416
ASAP3	Inverse variance weighted	6	-0.378882	0.172258	0.684626	0.488455	0.959582	0.0278418	3.26989	0.658454	-0.00565888	0.0387469	0.890949
ASB1	Inverse variance weighted	36	-0.0748626	0.0477151	0.927871	0.845029	1.01883	0.11666	33.7595	0.527918	-0.00735804	0.0144543	0.614001
ASB13	Inverse variance weighted	34	-0.0583446	0.0576254	0.943325	0.842577	1.05612	0.311309	17.5521	0.987287	-0.00045886	0.0153718	0.976371
ASB14	Inverse variance weighted	3	-0.176477	0.313183	0.838218	0.453701	1.54862	0.573098	3.69321	0.157772	0.10428	0.102439	0.494331
ASB16-AS1	Inverse variance weighted	33	0.0143358	0.0571096	1.01444	0.907012	1.13459	0.801796	37.6199	0.227404	-0.02687	0.0176829	0.138759
ASB16	Inverse variance weighted	2	0.135395	0.266341	1.14499	0.679341	1.92981	0.611205	NA	NA	NA	NA	NA
ASB2	Inverse variance weighted	2	-0.150679	0.373952	0.860124	0.413282	1.79009	0.686995	NA	NA	NA	NA	NA
ASB6	Inverse variance weighted	3	0.501151	0.284493	1.65062	0.945109	2.88279	0.0781437	2.14319	0.342461	-0.0649913	0.100241	0.633808
ASB7	Inverse variance weighted	3	0.0892594	0.506584	1.09336	0.40509	2.95106	0.860138	4.21181	0.121736	-0.145178	0.129728	0.464258
ASB8	Inverse variance weighted	10	-0.0858188	0.123352	0.91776	0.720659	1.16877	0.486603	6.55896	0.68293	-0.00765618	0.029819	0.803848
ASCC1	Inverse variance weighted	32	0.132282	0.0511232	1.14143	1.0326	1.26173	0.00966708	27.4147	0.65119	-0.00580583	0.0182845	0.753043
ASCC2	Inverse variance weighted	30	0.148429	0.0664672	1.16001	1.01832	1.32142	0.0255409	37.8159	0.126485	-0.0315196	0.0162719	0.0628879
ASCC3	Inverse variance weighted	10	0.390133	0.107237	1.47718	1.19716	1.8227	0.000274725	6.75383	0.662732	-0.00897434	0.0413511	0.833619
ASCL2	Inverse variance weighted	18	0.0273222	0.0556467	1.0277	0.921507	1.14613	0.623431	15.1962	0.581354	-0.00877687	0.0236894	0.715871
ASF1A	Inverse variance weighted	30	-0.0244713	0.0535249	0.975826	0.87864	1.08376	0.647531	32.4458	0.30065	-0.0140808	0.0177281	0.433722
ASF1B	Inverse variance weighted	2	0.0500234	0.238353	1.0513	0.658923	1.67732	0.833768	NA	NA	NA	NA	NA
ASGR1	Inverse variance weighted	11	-0.165188	0.12505	0.847734	0.663461	1.08319	0.186508	9.9056	0.448814	-0.0274128	0.0296333	0.379068
ASGR2	Inverse variance weighted	56	0.0414727	0.0354087	1.04234	0.972458	1.11725	0.241494	62.347	0.231328	0.00223354	0.012505	0.858911
ASH2LP1	Inverse variance weighted	2	0.152528	0.151573	1.16478	0.865407	1.5677	0.31427	NA	NA	NA	NA	NA
ASIC1	Inverse variance weighted	6	0.193987	0.201253	1.21408	0.818347	1.80118	0.335098	11.848	0.0369314	0.0163289	0.0618424	0.804794
ASIC3	Inverse variance weighted	3	-0.00901444	0.139668	0.991026	0.753698	1.30309	0.948539	1.4645	0.480827	-0.126953	0.113196	0.46357
ASL	Inverse variance weighted	16	0.0428687	0.0949089	1.0438	0.866622	1.2572	0.651497	15.2129	0.436192	0.0234616	0.0307581	0.458257
ASLP1	Inverse variance weighted	11	-0.0889696	0.0445299	0.914873	0.83841	0.99831	0.0457194	7.13629	0.712519	-0.0149568	0.0215821	0.505788
ASNS	Inverse variance weighted	56	-0.0322647	0.0304921	0.96825	0.912079	1.02788	0.289994	42.2639	0.895855	0.00205553	0.0119741	0.864343
ASNSD1	Inverse variance weighted	69	-0.0409911	0.0289262	0.959838	0.906933	1.01583	0.156456	63.1466	0.643921	-0.013954	0.0117152	0.237815
ASPDH	Inverse variance weighted	12	-0.186333	0.108515	0.829997	0.670976	1.02671	0.0859574	10.0919	0.522142	0.00508819	0.0305022	0.870842
ASPH	Inverse variance weighted	31	-0.0534922	0.0629633	0.947913	0.837863	1.07242	0.39556	26.8726	0.629952	0.00397368	0.0163417	0.809592
ASPHD2	Inverse variance weighted	11	0.00957342	0.097127	1.00962	0.834606	1.22133	0.921483	12.6117	0.246201	-0.00428236	0.0335647	0.901283
ASPRV1	Inverse variance weighted	15	0.0537814	0.0795393	1.05525	0.902925	1.23328	0.498938	21.7944	0.0829383	0.0319185	0.0224235	0.178164
ASPSCR1	Inverse variance weighted	13	-0.033924	0.0803232	0.966645	0.825837	1.13146	0.672774	6.84041	0.867977	0.00870472	0.0308149	0.782817
ASRGL1	Inverse variance weighted	25	-0.0576117	0.0476111	0.944016	0.859908	1.03635	0.22626	24.0935	0.456264	-0.00715284	0.0185412	0.703205
ASS1P1	Inverse variance weighted	14	-0.0135645	0.0474977	0.986527	0.898831	1.08278	0.775198	7.27901	0.887206	-0.0257386	0.0351676	0.47829
ASTE1	Inverse variance weighted	4	-0.123521	0.240624	0.883803	0.551483	1.41638	0.607715	0.539349	0.910165	-0.00905124	0.0747171	0.914654
ASTN2	Inverse variance weighted	4	0.0295411	0.215462	1.02998	0.675188	1.57121	0.890947	1.77221	0.621	-0.0115281	0.0511122	0.842506
ASUN	Inverse variance weighted	3	-0.134834	0.2865	0.873861	0.498389	1.5322	0.637909	0.59112	0.744115	0.0120838	0.0935264	0.9182
ASXL1	Inverse variance weighted	13	-0.0897514	0.102158	0.914158	0.748278	1.11681	0.379643	11.0588	0.523884	-0.0220082	0.02824	0.452228
ATAD1	Inverse variance weighted	3	0.227366	0.259344	1.25529	0.755068	2.0869	0.380651	0.946587	0.622947	0.0725547	0.0773281	0.520268
ATAD3A	Inverse variance weighted	2	0.285232	0.238217	1.33007	0.833874	2.12153	0.231165	NA	NA	NA	NA	NA
ATAD3B	Inverse variance weighted	3	-0.10502	0.148313	0.900307	0.673199	1.20403	0.478888	0.262021	0.877209	-0.0538753	0.117893	0.727115
ATAD5	Inverse variance weighted	3	0.353068	0.426376	1.42343	0.617159	3.28302	0.407632	5.16135	0.0757228	0.0770473	0.140579	0.680824
ATE1	Inverse variance weighted	5	-0.126418	0.196308	0.881246	0.599786	1.29479	0.519588	2.77991	0.595305	-0.00778508	0.0357326	0.841508
ATF1	Inverse variance weighted	21	-0.219388	0.0721648	0.80301	0.697097	0.925015	0.00236499	21.2748	0.381118	5.56348e-05	0.0217483	0.997986
ATF3	Inverse variance weighted	5	-0.286433	0.211173	0.750937	0.49642	1.13595	0.174976	1.15023	0.886223	-0.0217596	0.0656865	0.762235
ATF5	Inverse variance weighted	10	-0.027372	0.153641	0.972999	0.719997	1.31491	0.858601	8.81055	0.454943	-0.00243147	0.0347935	0.946002
ATF6	Inverse variance weighted	23	-0.152444	0.0576236	0.858607	0.76691	0.961268	0.00815681	11.4974	0.966909	0.00881998	0.0171173	0.611749
ATF6B	Inverse variance weighted	13	0.0424765	0.0758015	1.04339	0.89934	1.21052	0.57523	16.2907	0.178281	0.0361756	0.0282075	0.226041
ATF7IP	Inverse variance weighted	3	-0.466637	0.268263	0.627108	0.370674	1.06094	0.0819512	1.80339	0.405882	0.0206582	0.134506	0.902983
ATF7IP2	Inverse variance weighted	23	-0.15685	0.0752951	0.854832	0.737545	0.990771	0.0372383	29.6788	0.126481	-0.0651572	0.0226859	0.00912181
ATG10	Inverse variance weighted	38	-0.00604552	0.0429428	0.993973	0.913736	1.08125	0.888043	35.7561	0.52728	0.00694577	0.0122538	0.574351
ATG12	Inverse variance weighted	16	-0.148582	0.0708873	0.861929	0.750121	0.990404	0.0360796	20.2464	0.162684	0.00477359	0.0286836	0.870204
ATG13	Inverse variance weighted	2	0.949241	0.427305	2.58375	1.1182	5.97007	0.0263199	NA	NA	NA	NA	NA
ATG14	Inverse variance weighted	2	-0.0834773	0.660282	0.919912	0.252175	3.35575	0.899394	NA	NA	NA	NA	NA
ATG16L1	Inverse variance weighted	10	-0.254701	0.116737	0.775148	0.616618	0.974436	0.0291218	6.53536	0.685369	-0.0176885	0.0272221	0.53404
ATG16L2	Inverse variance weighted	3	0.124094	0.237402	1.13212	0.710907	1.80291	0.601172	2.13113	0.344534	0.345582	0.245828	0.393621
ATG2B	Inverse variance weighted	3	0.0569037	0.276491	1.05855	0.615686	1.81998	0.836942	3.40059	0.18263	-0.0918839	0.0583927	0.360402
ATG4B	Inverse variance weighted	11	-0.0975511	0.054752	0.907056	0.814757	1.00981	0.0747999	10.5613	0.392703	-0.0497618	0.0254985	0.0827591
ATG4C	Inverse variance weighted	15	0.102093	0.12517	1.10749	0.866546	1.41542	0.414708	22.0396	0.077804	0.0541992	0.0389601	0.187532
ATG7	Inverse variance weighted	18	0.105573	0.0752421	1.11135	0.958964	1.28794	0.160583	8.27483	0.960312	-0.00554459	0.021704	0.80162
ATG9A	Inverse variance weighted	7	0.168259	0.173944	1.18324	0.841414	1.66394	0.333387	2.44795	0.874247	0.0377331	0.0371838	0.356774
ATG9B	Inverse variance weighted	2	-0.0880791	0.428776	0.915688	0.395154	2.12192	0.837244	NA	NA	NA	NA	NA
ATHL1	Inverse variance weighted	32	0.011312	0.0300394	1.01138	0.953548	1.07271	0.706492	30.4407	0.494629	0.0127145	0.0148595	0.398975
ATIC	Inverse variance weighted	12	0.0979217	0.0826043	1.10288	0.938021	1.2967	0.235847	11.7561	0.382252	-0.0119813	0.0438589	0.790276
ATL1	Inverse variance weighted	3	-0.124558	0.439334	0.882887	0.373195	2.08869	0.776782	6.07164	0.0480354	0.130663	0.0867308	0.373059
ATL2	Inverse variance weighted	17	0.119618	0.0993083	1.12707	0.927719	1.36925	0.228392	15.1114	0.516493	0.0141051	0.021379	0.519409
ATL3	Inverse variance weighted	11	0.168383	0.126749	1.18339	0.923075	1.51712	0.184021	14.5709	0.148507	0.0143175	0.0519574	0.789106
ATM	Inverse variance weighted	2	-0.252754	0.205617	0.776659	0.519046	1.16213	0.218981	NA	NA	NA	NA	NA
ATMIN	Inverse variance weighted	3	0.21257	0.277327	1.23685	0.718212	2.13002	0.443382	2.60475	0.271885	-0.0360128	0.0545133	0.628336
ATN1	Inverse variance weighted	5	-0.279208	0.189028	0.756383	0.522201	1.09558	0.139658	3.23288	0.519637	0.00301041	0.0621644	0.96442
ATOH8	Inverse variance weighted	56	0.0855143	0.0306713	1.08928	1.02572	1.15677	0.00530198	50.228	0.657178	0.00689463	0.010886	0.529178
ATOX1	Inverse variance weighted	26	-0.0545554	0.0693999	0.946906	0.82648	1.08488	0.431808	27.6825	0.322676	0.00526181	0.0235151	0.824836
ATP10A	Inverse variance weighted	22	-0.0484348	0.061929	0.952719	0.84382	1.07567	0.434155	15.0693	0.819459	0.0283408	0.0223979	0.220296
ATP10D	Inverse variance weighted	20	0.260333	0.108555	1.29736	1.04872	1.60496	0.0164769	23.7287	0.206767	0.0499479	0.0325336	0.142107
ATP11A	Inverse variance weighted	3	0.199561	0.300649	1.22087	0.677252	2.20083	0.50684	0.088917	0.956515	0.0223771	0.0846013	0.835383
ATP11B	Inverse variance weighted	14	0.104143	0.11013	1.10976	0.894303	1.37712	0.344331	6.16249	0.940039	-0.0172459	0.0296322	0.57134
ATP13A1	Inverse variance weighted	27	-0.240714	0.0616726	0.786067	0.696566	0.887066	9.4972e-05	28.5319	0.332793	-0.000606866	0.015144	0.968353
ATP13A2	Inverse variance weighted	8	0.0503912	0.135713	1.05168	0.806053	1.37216	0.710408	1.7863	0.970716	0.0252688	0.0339097	0.48432
ATP13A3	Inverse variance weighted	5	-0.366008	0.211266	0.693497	0.458365	1.04925	0.0831932	3.39256	0.494402	-0.00842288	0.0513629	0.880167
ATP13A4	Inverse variance weighted	13	-0.0731717	0.0857886	0.929441	0.785592	1.09963	0.393698	6.25514	0.902678	0.00787285	0.0400931	0.847906
ATP1A1OS	Inverse variance weighted	15	0.0136054	0.0483049	1.0137	0.922127	1.11436	0.778207	16.7438	0.270086	0.0219922	0.0323777	0.5089
ATP1A4	Inverse variance weighted	24	-0.0629832	0.0659385	0.938959	0.825123	1.0685	0.339486	23.6559	0.423062	-0.00843805	0.0166339	0.617005
ATP1B1	Inverse variance weighted	48	-0.0653827	0.0423843	0.936709	0.862038	1.01785	0.122924	38.4533	0.808267	0.00255957	0.0118658	0.830167
ATP1B2	Inverse variance weighted	9	0.403391	0.117457	1.49689	1.18907	1.8844	0.000593957	9.63285	0.291746	-0.0384389	0.0251465	0.17021
ATP1B3	Inverse variance weighted	3	-0.701892	0.334833	0.495646	0.257132	0.955405	0.0360602	0.452652	0.797458	0.0353276	0.10838	0.799401
ATP2A1	Inverse variance weighted	2	-0.196925	0.309145	0.821252	0.44805	1.50531	0.524126	NA	NA	NA	NA	NA
ATP2A2	Inverse variance weighted	2	-0.256235	0.256774	0.77396	0.467894	1.28023	0.318327	NA	NA	NA	NA	NA
ATP2A3	Inverse variance weighted	8	0.254644	0.179776	1.29	0.906905	1.83493	0.156644	12.2475	0.092709	0.0276214	0.0682971	0.699918
ATP2B4	Inverse variance weighted	4	0.17175	0.485921	1.18738	0.458106	3.07762	0.723748	7.40842	0.0599588	-0.190015	0.339299	0.631821
ATP2C1	Inverse variance weighted	7	0.0518202	0.171426	1.05319	0.752635	1.47376	0.762432	3.59987	0.730638	-0.00724311	0.0383174	0.857503
ATP2C2	Inverse variance weighted	15	-0.13436	0.0914495	0.874275	0.730811	1.0459	0.141772	15.9659	0.315462	-0.0322864	0.0285584	0.278677
ATP5A1	Inverse variance weighted	18	0.0775931	0.0789501	1.08068	0.925752	1.26154	0.3257	17.846	0.398616	-0.0465998	0.0278135	0.113277
ATP5D	Inverse variance weighted	10	-0.212287	0.0925867	0.808732	0.674518	0.969653	0.0218567	10.8524	0.285959	-0.0637561	0.0278993	0.0516484
ATP5E	Inverse variance weighted	2	-0.193688	0.155256	0.823915	0.607752	1.11696	0.212199	NA	NA	NA	NA	NA
ATP5G1	Inverse variance weighted	23	0.206866	0.0661616	1.22982	1.08025	1.4001	0.00176792	16.5727	0.786484	-0.002111	0.0172897	0.903984
ATP5G2	Inverse variance weighted	2	0.159757	0.28158	1.17323	0.675609	2.03736	0.570471	NA	NA	NA	NA	NA
ATP5G3	Inverse variance weighted	4	-0.412577	0.303298	0.661942	0.365298	1.19948	0.173733	4.02505	0.258772	0.115903	0.0616687	0.200945
ATP5H	Inverse variance weighted	6	-0.00079237	0.0934477	0.999208	0.831978	1.20005	0.993235	7.51671	0.184959	0.0926026	0.0508768	0.142855
ATP5J2	Inverse variance weighted	3	0.0759633	0.511048	1.07892	0.396257	2.93767	0.881836	4.70319	0.095217	0.103906	0.12585	0.56062
ATP5L	Inverse variance weighted	3	-0.390795	0.245758	0.676519	0.417914	1.09515	0.111798	2.54216	0.280528	0.0854685	0.0641432	0.409865
ATP5O	Inverse variance weighted	8	0.236695	0.152884	1.26705	0.938984	1.70975	0.121573	0.899947	0.996285	0.00715683	0.082849	0.933972
ATP5S	Inverse variance weighted	17	0.025347	0.094416	1.02567	0.852392	1.23417	0.788344	11.8209	0.756216	0.0228585	0.0211314	0.296456
ATP5SL	Inverse variance weighted	15	0.177778	0.109923	1.19456	0.963029	1.48176	0.105816	18.6666	0.178083	0.0386688	0.051452	0.46571
ATP6AP1L	Inverse variance weighted	52	-0.035349	0.0349509	0.965269	0.901358	1.03371	0.31183	49.3924	0.537696	0.000808908	0.0149041	0.956933
ATP6V0A1	Inverse variance weighted	3	0.108617	0.289293	1.11473	0.632296	1.96527	0.707322	1.56595	0.457045	-0.0745258	0.0640068	0.451753
ATP6V0A2	Inverse variance weighted	7	0.0597285	0.183554	1.06155	0.740791	1.52119	0.744878	4.26675	0.640627	0.0434892	0.0394937	0.320989
ATP6V0B	Inverse variance weighted	8	0.00399158	0.105178	1.004	0.816967	1.23385	0.969727	5.1857	0.637313	0.0115185	0.0304474	0.718225
ATP6V0D1	Inverse variance weighted	15	0.048692	0.0558384	1.0499	0.941057	1.17132	0.383199	11.9891	0.607177	-0.0218372	0.020574	0.307831
ATP6V0E2-AS1	Inverse variance weighted	6	-0.0718038	0.137388	0.930713	0.710999	1.21832	0.601227	1.78489	0.878037	0.0264204	0.044507	0.584705
ATP6V0E2	Inverse variance weighted	31	0.0437569	0.0589954	1.04473	0.930648	1.17279	0.458269	45.0599	0.0381089	0.0395674	0.0183762	0.0397544
ATP6V1A	Inverse variance weighted	3	-0.111164	0.246485	0.894792	0.551963	1.45056	0.651992	0.615865	0.734965	0.00445241	0.48117	0.994109
ATP6V1B2	Inverse variance weighted	2	0.0857588	0.500399	1.08954	0.408598	2.90531	0.863924	NA	NA	NA	NA	NA
ATP6V1C1	Inverse variance weighted	18	-0.0755969	0.0812809	0.92719	0.790644	1.08732	0.352335	15.9538	0.527116	-0.0145518	0.0170786	0.406761
ATP6V1C2	Inverse variance weighted	2	0.281531	0.327321	1.32516	0.697663	2.51703	0.38973	NA	NA	NA	NA	NA
ATP6V1D	Inverse variance weighted	10	-0.0795369	0.0919687	0.923544	0.771209	1.10597	0.387134	11.4176	0.248169	-0.0474683	0.0269154	0.115808
ATP6V1E1	Inverse variance weighted	15	0.0127159	0.0839685	1.0128	0.859107	1.19398	0.879631	23.8742	0.047451	-0.0168149	0.0314631	0.602062
ATP6V1E2	Inverse variance weighted	66	0.111923	0.0320031	1.11843	1.05043	1.19083	0.000470039	51.9331	0.879757	0.017727	0.00995397	0.0796748
ATP6V1G1	Inverse variance weighted	6	0.0826554	0.209134	1.08617	0.720906	1.6365	0.692675	7.33168	0.197118	-0.0612152	0.0311732	0.121038
ATP6V1G2	Inverse variance weighted	16	-0.0961437	0.0949117	0.908333	0.754145	1.09405	0.311069	26.9077	0.029497	-0.00507273	0.0306009	0.870707
ATP7B	Inverse variance weighted	18	-0.14103	0.0812925	0.868463	0.740549	1.01847	0.0827685	13.1441	0.726488	-0.0254244	0.0226665	0.278554
ATP8A1	Inverse variance weighted	17	0.102688	0.0985187	1.10815	0.913558	1.34418	0.297261	12.4027	0.715827	0.0130103	0.0215226	0.554548
ATP8A2	Inverse variance weighted	6	0.169774	0.187431	1.18504	0.820705	1.7111	0.365046	2.93115	0.7106	-0.0380058	0.0494973	0.485403
ATP8B1	Inverse variance weighted	4	0.0246357	0.19015	1.02494	0.706057	1.48785	0.896915	1.89433	0.594627	0.107243	0.0886405	0.349928
ATP8B2	Inverse variance weighted	8	0.438035	0.148922	1.54966	1.15737	2.07492	0.00326774	7.98588	0.33384	-0.0536651	0.0316589	0.14099
ATP8B3	Inverse variance weighted	8	-0.0487806	0.188096	0.95239	0.658726	1.37697	0.795373	21.9849	0.00255564	-0.084204	0.0892587	0.38191
ATP8B4	Inverse variance weighted	53	-0.172921	0.0374934	0.841204	0.781603	0.90535	3.98731e-06	34.3847	0.971656	-0.0174989	0.0146243	0.23701
ATP9A	Inverse variance weighted	42	-0.0710457	0.0378342	0.931419	0.864849	1.00311	0.0604062	27.6892	0.944339	-0.0079256	0.0158745	0.620327
ATP9B	Inverse variance weighted	33	-0.0460564	0.0660851	0.954988	0.838968	1.08705	0.48585	62.2621	0.00106311	-0.0685224	0.0280979	0.0206643
ATPAF1	Inverse variance weighted	9	-0.280002	0.13722	0.755782	0.577554	0.989011	0.0412979	3.9681	0.85999	0.0428121	0.0431551	0.354219
ATPAF2	Inverse variance weighted	18	-0.128577	0.064297	0.879346	0.775227	0.997449	0.0455294	19.2083	0.316707	-0.00958744	0.0182158	0.605881
ATPBD4	Inverse variance weighted	2	-0.350728	0.40113	0.704175	0.320798	1.54572	0.381928	NA	NA	NA	NA	NA
ATPIF1	Inverse variance weighted	15	0.0979308	0.0858901	1.10289	0.932008	1.30509	0.254208	7.55717	0.911098	-0.0332825	0.0285572	0.264769
ATRAID	Inverse variance weighted	25	-0.195411	0.0840685	0.822497	0.697547	0.969828	0.0201028	45.8605	0.00460101	-0.0157108	0.0265928	0.560421
ATRIP	Inverse variance weighted	11	-0.0320914	0.0979738	0.968418	0.799219	1.17344	0.743251	8.06167	0.622813	0.0191639	0.0254055	0.469932
ATRN	Inverse variance weighted	3	0.255118	0.282926	1.29061	0.741251	2.24713	0.367208	0.384803	0.824975	-0.0335263	0.100768	0.795525
ATXN1	Inverse variance weighted	13	0.152469	0.109366	1.16471	0.939987	1.44315	0.163284	16.2206	0.181339	-0.00754987	0.0268358	0.783675
ATXN10	Inverse variance weighted	11	0.20051	0.105231	1.22203	0.994274	1.50195	0.056724	9.04369	0.527962	0.00968491	0.0250743	0.708285
ATXN2	Inverse variance weighted	2	-0.33386	0.386094	0.716154	0.336014	1.52636	0.387197	NA	NA	NA	NA	NA
ATXN2L	Inverse variance weighted	2	0.197858	0.442562	1.21879	0.511932	2.90165	0.654822	NA	NA	NA	NA	NA
ATXN3	Inverse variance weighted	6	0.327397	0.133573	1.38735	1.06779	1.80255	0.0142427	5.46195	0.362137	0.00988705	0.0356559	0.795298
ATXN7L1	Inverse variance weighted	2	-0.0414287	0.46317	0.959418	0.387034	2.3783	0.928728	NA	NA	NA	NA	NA
ATXN7L2	Inverse variance weighted	2	0.167176	0.203602	1.18196	0.793039	1.76162	0.411593	NA	NA	NA	NA	NA
ATXN7L3B	Inverse variance weighted	14	0.1069	0.0955238	1.11282	0.922815	1.34195	0.263102	16.1603	0.240582	0.0323854	0.0312515	0.320503
AUH	Inverse variance weighted	2	-0.344741	0.250917	0.708404	0.433208	1.15842	0.169465	NA	NA	NA	NA	NA
AUP1	Inverse variance weighted	4	-0.559225	0.246499	0.571652	0.35262	0.926735	0.0232882	4.0781	0.253153	-0.072051	0.115713	0.597036
AURKB	Inverse variance weighted	6	-0.112563	0.10631	0.893541	0.725474	1.10054	0.289682	4.85109	0.434323	-0.0280532	0.039221	0.513978
AURKC	Inverse variance weighted	4	0.00273352	0.236254	1.00274	0.631078	1.59328	0.990769	1.44086	0.695985	0.273507	0.451573	0.606308
AUTS2	Inverse variance weighted	39	-0.188435	0.0696526	0.828254	0.72256	0.949408	0.00682308	45.5202	0.18757	-0.00384365	0.0189593	0.840456
AVEN	Inverse variance weighted	7	-0.0341719	0.221581	0.966405	0.625958	1.49202	0.877438	11.7443	0.0679234	0.0478724	0.0660303	0.500945
AVIL	Inverse variance weighted	14	-0.0662723	0.0579497	0.935876	0.835392	1.04845	0.252782	9.98301	0.695323	-0.0141017	0.0228157	0.548081
AVL9	Inverse variance weighted	9	0.0880564	0.0885714	1.09205	0.918013	1.29908	0.320132	7.14264	0.521324	-0.00294355	0.0364724	0.937934
AVPI1	Inverse variance weighted	9	0.308682	0.134155	1.36163	1.0468	1.77114	0.0213953	9.08872	0.334867	0.0397331	0.0265682	0.178434
AXIN1	Inverse variance weighted	19	-0.0645488	0.0600689	0.93749	0.833365	1.05463	0.282563	23.472	0.173099	0.0076868	0.023772	0.75037
AXIN2	Inverse variance weighted	23	0.195746	0.0588544	1.21622	1.08371	1.36493	0.000881228	25.0977	0.292423	-0.00823695	0.0192712	0.673422
AXL	Inverse variance weighted	7	-0.17681	0.159627	0.837939	0.612823	1.14575	0.268013	4.89438	0.55743	-0.0816432	0.0558096	0.203362
AZI1	Inverse variance weighted	10	-0.260468	0.104074	0.770691	0.628479	0.945082	0.0123241	5.0408	0.830737	0.0111569	0.0387275	0.780602
AZI2	Inverse variance weighted	15	0.199302	0.090066	1.22055	1.02303	1.4562	0.0269084	7.15357	0.928629	0.0148906	0.0362803	0.688174
AZIN1	Inverse variance weighted	15	0.11547	0.0812562	1.1224	0.957153	1.31618	0.155298	16.9091	0.261055	-0.00261234	0.0262136	0.922138
B3GALNT1	Inverse variance weighted	15	-0.222572	0.0919724	0.800457	0.66842	0.958576	0.0155209	13.8773	0.458891	-0.00805311	0.0259326	0.761073
B3GALNT2	Inverse variance weighted	45	0.0757431	0.0382958	1.07869	1.00068	1.16277	0.0479461	44.5571	0.448202	0.0311094	0.0168685	0.0720457
B3GALT2	Inverse variance weighted	3	0.357606	0.367194	1.4299	0.696217	2.93676	0.330111	2.54424	0.280237	-0.0772559	0.0821966	0.51972
B3GALT6	Inverse variance weighted	15	0.0846477	0.0508544	1.08833	0.985085	1.2024	0.0960104	6.1185	0.963416	0.00815898	0.0284436	0.77875
B3GALTL	Inverse variance weighted	25	0.0319067	0.05038	1.03242	0.935347	1.13957	0.526524	21.7543	0.593929	-0.0198715	0.0182413	0.287275
B3GAT1	Inverse variance weighted	18	-0.0931278	0.0773998	0.911077	0.782837	1.06033	0.228897	8.7443	0.947943	-0.00869062	0.019142	0.655921
B3GAT3	Inverse variance weighted	2	0.615529	0.463809	1.85063	0.745621	4.59328	0.18447	NA	NA	NA	NA	NA
B3GNT1	Inverse variance weighted	4	-0.470541	0.173372	0.624664	0.444703	0.877453	0.00664648	0.785403	0.852955	0.0150497	0.0693885	0.848408
B3GNT2	Inverse variance weighted	39	0.148737	0.0504678	1.16037	1.05108	1.28102	0.00320702	26.158	0.926983	0.00535479	0.0161244	0.741694
B3GNT3	Inverse variance weighted	8	-0.0761882	0.107236	0.926642	0.750984	1.14339	0.477412	3.72745	0.81058	0.000990071	0.0314471	0.975905
B3GNT5	Inverse variance weighted	16	0.0280394	0.0921639	1.02844	0.858471	1.23205	0.760949	13.2676	0.581635	-0.015948	0.0208633	0.457317
B3GNT7	Inverse variance weighted	2	-0.0616883	0.35765	0.940176	0.466414	1.89516	0.863058	NA	NA	NA	NA	NA
B3GNT8	Inverse variance weighted	5	0.480863	0.219221	1.61747	1.05252	2.48566	0.0282711	1.91267	0.751818	0.00315071	0.052773	0.956147
B3GNT9	Inverse variance weighted	2	-0.183315	0.398669	0.832506	0.381095	1.81862	0.645648	NA	NA	NA	NA	NA
B3GNTL1	Inverse variance weighted	32	-0.0666488	0.0365851	0.935524	0.870789	1.00507	0.0684932	28.4475	0.597985	-0.00847294	0.0185495	0.651123
B4GALNT3	Inverse variance weighted	16	-0.0164066	0.0624796	0.983727	0.870344	1.11188	0.792865	8.55294	0.89971	0.0407046	0.0210616	0.0737681
B4GALNT4	Inverse variance weighted	12	0.0117114	0.115704	1.01178	0.806486	1.26933	0.919377	9.57489	0.568982	0.00439853	0.0260986	0.869522
B4GALT1	Inverse variance weighted	15	0.0666335	0.0806468	1.0689	0.912621	1.25195	0.408669	7.65644	0.906446	-0.0295334	0.0239771	0.239865
B4GALT3	Inverse variance weighted	5	-0.414635	0.191024	0.660581	0.454279	0.960571	0.0299624	5.15173	0.27208	-0.0967174	0.0524878	0.162606
B4GALT4	Inverse variance weighted	46	-0.0104184	0.0453825	0.989636	0.905409	1.0817	0.818427	28.9772	0.969436	0.0221446	0.0127242	0.0887885
B4GALT5	Inverse variance weighted	3	-0.607563	0.243354	0.544677	0.338058	0.877579	0.0125385	1.91753	0.383366	0.28432	0.212418	0.408487
B4GALT6	Inverse variance weighted	9	-0.672498	0.193388	0.510432	0.3494	0.745682	0.000506212	11.357	0.182278	0.0124693	0.0493071	0.807618
B4GALT7	Inverse variance weighted	20	0.0613265	0.0793365	1.06325	0.910125	1.24213	0.439527	15.3914	0.697417	0.0165482	0.0284119	0.567497
B9D2	Inverse variance weighted	3	-0.141605	0.233493	0.867964	0.549222	1.37169	0.544207	1.0877	0.580508	0.0215259	0.0470027	0.726595
BAALC	Inverse variance weighted	8	-0.0290237	0.134474	0.971393	0.746327	1.26433	0.829119	5.12794	0.644354	-0.0140395	0.0332922	0.687931
BABAM1	Inverse variance weighted	17	-0.0118898	0.0753958	0.988181	0.852429	1.14555	0.874694	14.9365	0.529295	-0.0159955	0.0296679	0.597695
BACE1	Inverse variance weighted	15	-0.271412	0.0793882	0.762303	0.652455	0.890644	0.000629005	12.4574	0.569619	-0.0391087	0.0306414	0.224168
BACE2	Inverse variance weighted	13	0.150605	0.0977821	1.16254	0.959783	1.40812	0.123508	8.01649	0.78384	-0.00184688	0.0224653	0.935956
BACH1	Inverse variance weighted	4	0.946654	0.298014	2.57707	1.43698	4.6217	0.00149044	2.29559	0.513366	0.117211	0.200569	0.618094
BACH2	Inverse variance weighted	9	0.272116	0.159865	1.31274	0.959618	1.7958	0.0887256	10.5079	0.231172	-0.0191163	0.0295459	0.538259
BAG1	Inverse variance weighted	6	-0.0844341	0.15355	0.919032	0.680183	1.24175	0.582403	6.94655	0.224646	-0.0303252	0.0424858	0.514804
BAG2	Inverse variance weighted	3	0.103949	0.278455	1.10954	0.642864	1.91501	0.70892	6.16704	0.0457978	-0.126097	0.156817	0.568857
BAG3	Inverse variance weighted	11	-0.0466245	0.11682	0.954446	0.759122	1.20003	0.68981	7.25575	0.7011	-0.0317854	0.03001	0.317125
BAG4	Inverse variance weighted	7	0.0977001	0.212011	1.10263	0.727718	1.6707	0.644924	5.09632	0.53152	-0.0252975	0.0433233	0.584622
BAG5	Inverse variance weighted	14	0.294208	0.100377	1.34206	1.10238	1.63386	0.00337852	12.3102	0.502389	0.0482996	0.0361949	0.206831
BAG6	Inverse variance weighted	4	0.172084	0.152696	1.18778	0.880558	1.60218	0.259754	2.90295	0.406831	0.126093	0.104352	0.3504
BAHCC1	Inverse variance weighted	7	0.178377	0.127675	1.19528	0.930655	1.53514	0.16238	5.22568	0.515211	-0.0452077	0.0460086	0.370932
BAHD1	Inverse variance weighted	2	0.294078	0.31666	1.34189	0.72139	2.49611	0.353051	NA	NA	NA	NA	NA
BAI1	Inverse variance weighted	9	0.043822	0.145466	1.0448	0.785613	1.38949	0.763222	5.34586	0.720051	-0.028609	0.0353606	0.445103
BAIAP2-AS1	Inverse variance weighted	26	-0.000839123	0.0404574	0.999161	0.922991	1.08162	0.983452	20.0969	0.741724	-0.0113177	0.0178604	0.532285
BAIAP2	Inverse variance weighted	46	0.0332233	0.0439341	1.03378	0.948487	1.12675	0.449525	38.3634	0.747296	0.0219911	0.0135666	0.11217
BAIAP2L1	Inverse variance weighted	6	-0.0517342	0.272767	0.949581	0.556351	1.62075	0.849572	8.24331	0.143326	0.159651	0.0861635	0.13753
BAIAP2L2	Inverse variance weighted	11	0.0617391	0.0724836	1.06368	0.922813	1.22606	0.394344	9.62205	0.474253	-0.0129423	0.0207327	0.547964
BAIAP3	Inverse variance weighted	35	0.0315943	0.0512151	1.0321	0.933525	1.14108	0.537305	37.9394	0.29438	-0.00216955	0.0143944	0.881112
BAK1	Inverse variance weighted	42	0.0266631	0.0302012	1.02702	0.967992	1.08965	0.377317	34.8405	0.739868	-0.0389647	0.0138932	0.00773879
BAK1P1	Inverse variance weighted	2	-0.296075	0.180414	0.743732	0.52221	1.05922	0.100779	NA	NA	NA	NA	NA
BAMBI	Inverse variance weighted	15	0.0810785	0.0885743	1.08446	0.911625	1.29005	0.359996	12.1223	0.596482	0.0400559	0.0228991	0.103804
BANF1	Inverse variance weighted	33	0.123559	0.05894	1.13152	1.00807	1.27008	0.0360507	26.4265	0.74444	0.0080104	0.0180675	0.660584
BANK1	Inverse variance weighted	6	0.23898	0.25813	1.26995	0.765707	2.10626	0.354544	4.48996	0.481228	-0.0765854	0.0550608	0.236626
BANP	Inverse variance weighted	5	-0.368587	0.196823	0.691711	0.470311	1.01734	0.0611129	2.60092	0.626659	0.00735176	0.0532767	0.898988
BARD1	Inverse variance weighted	52	-0.0707463	0.037872	0.931698	0.865044	1.00349	0.061757	43.7786	0.753322	-0.018009	0.0128619	0.167633
BASP1	Inverse variance weighted	25	0.0495317	0.0839045	1.05078	0.891436	1.2386	0.554967	34.4409	0.077132	-0.033404	0.027053	0.229386
BATF	Inverse variance weighted	6	0.408166	0.261668	1.50406	0.900592	2.51189	0.118792	8.0152	0.1554	0.0417926	0.0591449	0.518794
BATF3	Inverse variance weighted	23	0.0810001	0.0663762	1.08437	0.952089	1.23503	0.222344	14.6919	0.875116	-0.015385	0.0204611	0.460447
BAX	Inverse variance weighted	18	-0.0482953	0.0789675	0.952852	0.81622	1.11236	0.540812	12.7409	0.753353	-0.00277455	0.0245216	0.911321
BAZ1A	Inverse variance weighted	5	-0.0206915	0.289793	0.979521	0.555056	1.72858	0.943079	6.193	0.185191	-0.0143496	0.0889017	0.882028
BAZ2B	Inverse variance weighted	55	0.00744043	0.0372648	1.00747	0.936507	1.08381	0.841743	54.4821	0.456041	-0.00552333	0.0128725	0.669605
BBIP1	Inverse variance weighted	5	-0.0520412	0.106201	0.94929	0.770901	1.16896	0.624116	2.94359	0.567309	0.00906059	0.18844	0.964673
BBS1	Inverse variance weighted	3	-0.0494339	0.210669	0.951768	0.629805	1.43832	0.814479	1.70116	0.427168	-0.0483549	0.210068	0.855968
BBS10	Inverse variance weighted	21	-0.0376082	0.0852154	0.96309	0.814948	1.13816	0.658973	18.5658	0.550187	0.0139827	0.0211488	0.51645
BBS12	Inverse variance weighted	10	0.0287477	0.140926	1.02916	0.780776	1.35657	0.83836	6.70396	0.667911	0.017603	0.0373165	0.649724
BBS2	Inverse variance weighted	86	-0.0465728	0.0283743	0.954495	0.902861	1.00908	0.10072	103.742	0.081677	0.00380304	0.0105542	0.719502
BBS4	Inverse variance weighted	13	0.0314147	0.0888714	1.03191	0.866951	1.22827	0.723725	15.1621	0.232689	-0.0123035	0.0248448	0.630191
BBS7	Inverse variance weighted	3	0.0755232	0.273432	1.07845	0.631029	1.8431	0.782391	0.643175	0.724997	-0.0349148	0.0712238	0.709837
BBS9	Inverse variance weighted	9	0.0831144	0.134668	1.08667	0.834574	1.41491	0.537115	7.43624	0.490377	0.00330525	0.045536	0.944166
BBX	Inverse variance weighted	9	-0.00757043	0.114122	0.992458	0.793541	1.24124	0.94711	3.86844	0.868794	-0.0051803	0.0339806	0.883134
BCAP29	Inverse variance weighted	5	0.360477	0.30266	1.43401	0.792362	2.59527	0.233642	5.12969	0.274248	-0.0385822	0.0459047	0.462343
BCAR1	Inverse variance weighted	6	0.106236	0.145044	1.11208	0.8369	1.47775	0.463901	5.72693	0.333703	0.025049	0.0359207	0.523996
BCAR3	Inverse variance weighted	5	-0.0169973	0.17432	0.983146	0.698609	1.38357	0.922324	1.25938	0.868228	-0.013917	0.038542	0.741965
BCAS1	Inverse variance weighted	10	-0.0708017	0.123533	0.931647	0.731303	1.18687	0.566551	12.4179	0.190764	0.0112151	0.0435293	0.803184
BCAS2P2	Inverse variance weighted	2	0.0266603	0.15776	1.02702	0.753859	1.39916	0.865803	NA	NA	NA	NA	NA
BCAS3	Inverse variance weighted	3	0.377831	0.251791	1.45912	0.89076	2.39012	0.133466	0.0242669	0.98794	-0.0222472	0.163814	0.914068
BCAS4	Inverse variance weighted	32	-0.0142171	0.0401075	0.985883	0.91135	1.06651	0.722983	17.0322	0.980093	-0.00710069	0.0192771	0.7152
BCAT1	Inverse variance weighted	66	-0.0269377	0.0365834	0.973422	0.906068	1.04578	0.461526	83.7535	0.0586667	-0.00605978	0.0119108	0.612666
BCAT2	Inverse variance weighted	16	-0.0365958	0.0843039	0.964066	0.817233	1.13728	0.664221	11.3133	0.730087	-0.0063318	0.0234194	0.790824
BCCIP	Inverse variance weighted	9	0.0340549	0.149425	1.03464	0.771964	1.3867	0.819718	1.59412	0.991032	-0.0148278	0.0308655	0.645593
BCKDHA	Inverse variance weighted	7	-0.0417181	0.128178	0.95914	0.746062	1.23307	0.744825	9.47746	0.148453	0.076577	0.0488336	0.17764
BCKDHB	Inverse variance weighted	10	0.130039	0.150909	1.13887	0.847264	1.53085	0.38885	9.38411	0.402599	-0.0702225	0.0435617	0.145622
BCKDK	Inverse variance weighted	23	0.00729372	0.0703014	1.00732	0.877659	1.15614	0.917368	23.8298	0.356212	-0.0215542	0.0290152	0.465796
BCL10	Inverse variance weighted	23	0.047353	0.0722256	1.04849	0.910092	1.20794	0.512065	16.8207	0.773178	0.033747	0.0250113	0.191619
BCL2	Inverse variance weighted	2	0.792673	0.44299	2.20929	0.927199	5.26423	0.0735552	NA	NA	NA	NA	NA
BCL2A1	Inverse variance weighted	8	0.06907	0.113063	1.07151	0.85853	1.33733	0.541268	9.97069	0.19024	-0.0059192	0.0514411	0.912146
BCL2L11	Inverse variance weighted	2	-0.17941	0.250047	0.835763	0.511963	1.36435	0.473061	NA	NA	NA	NA	NA
BCL2L13	Inverse variance weighted	20	-0.0621984	0.0656701	0.939696	0.826206	1.06878	0.34357	16.5707	0.618926	0.000955389	0.0229618	0.967269
BCL2L14	Inverse variance weighted	10	0.10633	0.149606	1.11219	0.829529	1.49117	0.477248	13.0805	0.158997	0.0373667	0.0271892	0.206609
BCL2L2	Inverse variance weighted	2	0.535077	0.540289	1.70758	0.592212	4.92362	0.322002	NA	NA	NA	NA	NA
BCL6	Inverse variance weighted	6	-0.164095	0.182602	0.848661	0.593336	1.21386	0.36884	1.29402	0.935546	-0.0179377	0.0406365	0.681722
BCL7A	Inverse variance weighted	6	-0.108727	0.165773	0.896975	0.648144	1.24133	0.5119	6.92389	0.226363	0.0201186	0.0495039	0.70525
BCL7B	Inverse variance weighted	4	0.337429	0.284256	1.40134	0.802749	2.44628	0.235204	3.21134	0.360174	-0.19915	0.112943	0.219909
BCL7C	Inverse variance weighted	2	0.295868	0.320034	1.34429	0.717919	2.51717	0.355231	NA	NA	NA	NA	NA
BCL9	Inverse variance weighted	13	0.130444	0.0739878	1.13933	0.985533	1.31714	0.0778929	10.3423	0.585956	0.0298389	0.0226774	0.215005
BCO2	Inverse variance weighted	6	-0.354208	0.176408	0.701729	0.496601	0.991587	0.0446545	3.16254	0.674943	0.0872801	0.0607103	0.223909
BCR	Inverse variance weighted	28	0.0112057	0.0521374	1.01127	0.913033	1.12007	0.829824	34.5615	0.150325	-0.00495143	0.0225426	0.827861
BCRP3	Inverse variance weighted	4	0.0421511	0.09297	1.04305	0.869297	1.25154	0.650272	0.296473	0.96069	-0.00078087	0.0458055	0.987946
BCS1L	Inverse variance weighted	2	-0.281829	0.144033	0.754403	0.568853	1.00048	0.0503835	NA	NA	NA	NA	NA
BDH1	Inverse variance weighted	8	-0.0602711	0.132353	0.941509	0.72638	1.22035	0.648834	3.44357	0.841166	0.0216615	0.0473741	0.663584
BDH2	Inverse variance weighted	28	-0.0171612	0.0444513	0.982985	0.900968	1.07247	0.699447	31.7602	0.24108	0.0162076	0.0275158	0.560926
BDP1	Inverse variance weighted	2	0.0218131	0.334691	1.02205	0.530369	1.96956	0.948036	NA	NA	NA	NA	NA
BEAN1	Inverse variance weighted	3	-0.0395113	0.169291	0.961259	0.689822	1.3395	0.815456	1.69551	0.428376	-0.0499339	0.0383866	0.417236
BECN1	Inverse variance weighted	17	0.0507814	0.0766918	1.05209	0.905259	1.22274	0.507875	25.7639	0.057442	-0.0263379	0.021289	0.235045
BEGAIN	Inverse variance weighted	45	0.103235	0.0367253	1.10875	1.03175	1.1915	0.00493858	43.1664	0.507249	-0.0075769	0.0120569	0.533047
BEND3P3	Inverse variance weighted	4	0.00739975	0.0764408	1.00743	0.867253	1.17026	0.922882	2.50237	0.474863	0.0309998	0.0499846	0.598383
BEND4	Inverse variance weighted	2	-0.258338	0.36043	0.772334	0.381067	1.56534	0.473529	NA	NA	NA	NA	NA
BEND5	Inverse variance weighted	5	-0.0620147	0.218177	0.939869	0.612846	1.4414	0.776226	5.32374	0.255663	0.0554974	0.0327566	0.188793
BEND7	Inverse variance weighted	18	-0.171436	0.0746229	0.842454	0.727823	0.975139	0.021598	13.8878	0.67503	0.0595569	0.028893	0.0559127
BEST1	Inverse variance weighted	31	0.0264574	0.0560905	1.02681	0.91991	1.14613	0.637147	27.52	0.595855	0.0172856	0.0143873	0.239296
BEST4	Inverse variance weighted	2	-0.162004	0.296245	0.850438	0.475854	1.51989	0.584476	NA	NA	NA	NA	NA
BET1	Inverse variance weighted	7	-0.185588	0.143914	0.830616	0.626467	1.10129	0.197197	9.33463	0.155615	0.00305073	0.0444485	0.94794
BET1L	Inverse variance weighted	25	0.0732012	0.0542129	1.07595	0.967484	1.19657	0.176934	30.6379	0.164499	-0.000640343	0.0232544	0.978269
BFAR	Inverse variance weighted	3	0.0593759	0.251557	1.06117	0.648123	1.73747	0.813406	0.0868692	0.957495	0.00919813	0.045737	0.873655
BFSP1	Inverse variance weighted	21	-0.417834	0.0951415	0.658471	0.546451	0.793456	1.1246e-05	14.2805	0.815995	-0.0282994	0.0182401	0.137282
BFSP2	Inverse variance weighted	5	-0.198348	0.172384	0.820085	0.584955	1.14973	0.249889	6.02689	0.197149	-0.0680756	0.0754009	0.433154
BHLHE40-AS1	Inverse variance weighted	4	0.166593	0.127047	1.18127	0.920886	1.51529	0.189765	0.578361	0.901368	-0.168761	0.231417	0.541688
BHLHE40	Inverse variance weighted	5	0.684712	0.240656	1.9832	1.23742	3.17846	0.00443849	1.87382	0.758952	-0.0516118	0.0612549	0.461338
BICC1	Inverse variance weighted	6	0.416695	0.163745	1.51694	1.10049	2.09099	0.0109348	3.27745	0.657297	-0.00301579	0.063877	0.964607
BICD1	Inverse variance weighted	6	-0.054748	0.170173	0.946724	0.678218	1.32153	0.747665	1.43785	0.920129	0.0349395	0.0488957	0.51436
BICD2	Inverse variance weighted	36	0.0544256	0.0520552	1.05593	0.953513	1.16936	0.295775	28.2797	0.782351	0.00810861	0.0162686	0.621397
BID	Inverse variance weighted	3	0.0574887	0.225108	1.05917	0.68132	1.64658	0.798427	0.878836	0.644411	0.0171266	0.0658626	0.838043
BIK	Inverse variance weighted	13	-0.0246615	0.147847	0.97564	0.730196	1.30359	0.867524	12.4784	0.408065	-0.00712208	0.0337081	0.836527
BIN1	Inverse variance weighted	51	-0.0472846	0.034568	0.953816	0.891332	1.02068	0.171352	43.3813	0.734365	-0.00391817	0.0124712	0.754721
BIN2	Inverse variance weighted	12	-0.00363691	0.0849192	0.99637	0.843599	1.17681	0.965839	15.6954	0.152819	0.0295574	0.0303368	0.352881
BIN3	Inverse variance weighted	23	-0.0348224	0.0569216	0.965777	0.863822	1.07977	0.540696	16.9265	0.767408	0.00416329	0.019664	0.834365
BIRC2	Inverse variance weighted	2	-0.349302	0.435117	0.70518	0.300553	1.65455	0.422103	NA	NA	NA	NA	NA
BIRC3	Inverse variance weighted	9	0.178052	0.138168	1.19489	0.911415	1.56653	0.197515	10.7287	0.217551	0.0131962	0.0333785	0.704355
BIRC5	Inverse variance weighted	5	-0.0856303	0.139261	0.917934	0.698667	1.20601	0.538626	1.71765	0.787509	0.0371223	0.0443116	0.463659
BIRC6	Inverse variance weighted	3	-0.282401	0.301018	0.753971	0.417949	1.36015	0.348167	0.14017	0.932315	0.032428	0.0966868	0.793988
BIRC7	Inverse variance weighted	28	-0.0557721	0.0552512	0.945755	0.848687	1.05392	0.312769	12.9386	0.989633	-0.0174679	0.0188535	0.362702
BIVM	Inverse variance weighted	16	-0.158865	0.0691198	0.853112	0.745024	0.976882	0.0215393	11.0395	0.749786	0.00213422	0.0211565	0.921078
BLK	Inverse variance weighted	115	0.0861634	0.0412301	1.08998	1.00537	1.18172	0.0366341	182.878	4.5174e-05	0.00282078	0.0169491	0.868119
BLM	Inverse variance weighted	43	-0.0979464	0.0394322	0.906697	0.839261	0.979553	0.0129945	45.2827	0.336658	-0.0261385	0.0151488	0.0919783
BLMH	Inverse variance weighted	31	0.00993495	0.0567674	1.00998	0.903636	1.12885	0.86107	29.7186	0.480132	0.0296226	0.022455	0.197424
BLOC1S1	Inverse variance weighted	2	-0.406743	0.212383	0.665815	0.439106	1.00957	0.0554751	NA	NA	NA	NA	NA
BLOC1S2	Inverse variance weighted	4	-0.158345	0.250959	0.853555	0.521928	1.39589	0.528067	1.39722	0.706187	-0.0771538	0.28055	0.809115
BLOC1S3	Inverse variance weighted	2	0.108355	0.469686	1.11444	0.443868	2.79809	0.817551	NA	NA	NA	NA	NA
BLOC1S4	Inverse variance weighted	2	0.456023	0.292659	1.57779	0.889063	2.80004	0.119184	NA	NA	NA	NA	NA
BLOC1S5	Inverse variance weighted	18	-0.222208	0.0973675	0.800749	0.66163	0.969119	0.02248	7.4217	0.977403	-0.0230869	0.0262258	0.391721
BLOC1S6	Inverse variance weighted	2	0.783423	0.318058	2.18895	1.17354	4.08294	0.0137726	NA	NA	NA	NA	NA
BLVRA	Inverse variance weighted	57	-0.0874708	0.0352632	0.916246	0.855057	0.981813	0.0131194	48.807	0.741321	-0.0177953	0.0135809	0.195535
BLVRB	Inverse variance weighted	38	-0.0107012	0.043604	0.989356	0.908314	1.07763	0.806134	44.1777	0.194278	0.00650925	0.0130811	0.621785
BMF	Inverse variance weighted	9	-0.170766	0.120574	0.843019	0.665583	1.06776	0.156697	3.94097	0.862409	0.00617175	0.0296537	0.841055
BMP1	Inverse variance weighted	12	-0.0840769	0.102121	0.919361	0.75259	1.12309	0.410334	11.7819	0.380256	-0.0159677	0.0325087	0.633899
BMP2	Inverse variance weighted	3	0.269743	0.155626	1.30963	0.965331	1.77672	0.0830465	0.0497402	0.975437	0.0004148	0.0350308	0.992462
BMP2K	Inverse variance weighted	5	-0.218812	0.258456	0.803473	0.484138	1.33344	0.397211	9.17236	0.0569327	0.111983	0.052649	0.123364
BMP4	Inverse variance weighted	3	-1.02144	0.389385	0.360075	0.167858	0.772404	0.00871034	0.242734	0.885709	-0.0296352	0.103545	0.82254
BMP6	Inverse variance weighted	8	-0.425725	0.144423	0.653296	0.492238	0.867052	0.00320081	3.44762	0.840742	-0.0123775	0.0328634	0.719406
BMP8A	Inverse variance weighted	10	0.0832281	0.051493	1.08679	0.982458	1.2022	0.106029	10.3648	0.321768	0.0349203	0.0323912	0.312428
BMP8B	Inverse variance weighted	3	-0.0284346	0.257629	0.971966	0.586615	1.61046	0.912116	0.0615381	0.9697	0.00618262	0.048448	0.919196
BMPR1A	Inverse variance weighted	2	-0.10934	0.256653	0.896426	0.542059	1.48246	0.670092	NA	NA	NA	NA	NA
BMPR2	Inverse variance weighted	20	0.108952	0.078677	1.11511	0.955754	1.30103	0.166113	27.9767	0.0838785	0.00489581	0.0346787	0.889299
BMS1	Inverse variance weighted	4	0.0273327	0.362476	1.02771	0.505039	2.0913	0.939892	7.54875	0.0563191	-0.0310449	0.0747733	0.718307
BNC2	Inverse variance weighted	13	0.0684637	0.0951599	1.07086	0.888652	1.29043	0.471858	6.822	0.869149	0.00999818	0.0245492	0.691623
BNIP1	Inverse variance weighted	21	0.0093755	0.0730297	1.00942	0.874798	1.16476	0.897849	10.8387	0.950299	-0.0192193	0.0191789	0.328884
BNIP2	Inverse variance weighted	6	0.0294967	0.164919	1.02994	0.745468	1.42296	0.85805	6.2225	0.285167	0.1049	0.046749	0.0882399
BNIPL	Inverse variance weighted	27	0.0492378	0.0590225	1.05047	0.935713	1.1793	0.404156	25.0735	0.514818	0.0258547	0.0171739	0.144735
BOD1	Inverse variance weighted	4	0.638192	0.270282	1.89305	1.11454	3.21538	0.0182155	2.11857	0.548165	0.071085	0.0515633	0.301967
BOD1L1	Inverse variance weighted	2	0.0740898	0.479121	1.0769	0.421057	2.75431	0.877108	NA	NA	NA	NA	NA
BOK	Inverse variance weighted	26	0.117908	0.0617998	1.12514	0.996785	1.27002	0.0564044	17.9499	0.844512	0.0255837	0.0183971	0.177096
BOP1	Inverse variance weighted	2	-0.303431	0.202258	0.738281	0.496657	1.09746	0.133559	NA	NA	NA	NA	NA
BORA	Inverse variance weighted	11	0.01366	0.0835811	1.01375	0.860571	1.1942	0.870176	3.32031	0.97285	-0.0158601	0.0208902	0.467145
BPHL	Inverse variance weighted	8	-0.206246	0.201317	0.813633	0.548358	1.20724	0.305606	9.9627	0.190697	0.0637475	0.0652437	0.36627
BPI	Inverse variance weighted	44	0.0700693	0.0472797	1.07258	0.977655	1.17673	0.138336	48.829	0.250347	0.00350937	0.0153651	0.820445
BRAT1	Inverse variance weighted	14	-0.0122022	0.0815704	0.987872	0.841912	1.15914	0.881087	21.057	0.0718089	-0.00513068	0.0295045	0.864847
BRCA1	Inverse variance weighted	12	0.158897	0.128607	1.17222	0.911036	1.50828	0.216636	19.1878	0.0578049	-0.0218532	0.0637002	0.738653
BRCA2	Inverse variance weighted	4	0.254767	0.211837	1.29016	0.851775	1.95417	0.229109	2.11644	0.548595	0.0468572	0.0827574	0.628318
BRD1	Inverse variance weighted	3	-0.421604	0.211181	0.655994	0.43365	0.992339	0.0458888	1.04266	0.59373	0.0261654	0.0562004	0.722606
BRD2	Inverse variance weighted	7	0.0530675	0.128941	1.0545	0.819011	1.3577	0.680659	3.8008	0.703613	-0.0196588	0.028778	0.524894
BRD3	Inverse variance weighted	13	0.0559543	0.0642473	1.05755	0.932421	1.19947	0.383797	3.71831	0.988	-0.00131018	0.0372756	0.972591
BRD7	Inverse variance weighted	33	0.0759969	0.0424226	1.07896	0.992874	1.17251	0.073225	35.4298	0.309581	0.00529216	0.0173799	0.762782
BRD9	Inverse variance weighted	3	0.0886193	0.19575	1.09266	0.744493	1.60366	0.650753	0.822749	0.662739	-0.00918863	0.0455423	0.873257
BRF1	Inverse variance weighted	2	0.039911	0.239547	1.04072	0.650769	1.66433	0.867676	NA	NA	NA	NA	NA
BRI3	Inverse variance weighted	18	0.0944976	0.0597038	1.09911	0.97773	1.23555	0.113473	13.1062	0.729047	0.0073182	0.0321256	0.822687
BRI3BP	Inverse variance weighted	18	0.146068	0.104626	1.15727	0.942708	1.42068	0.162686	12.8129	0.748621	-0.0335709	0.0270681	0.232768
BRICD5	Inverse variance weighted	5	0.100378	0.128393	1.10559	0.859614	1.42195	0.434331	0.703093	0.950947	-0.0146448	0.0607418	0.825016
BRIP1	Inverse variance weighted	3	-0.472423	0.302912	0.62349	0.344338	1.12895	0.118854	0.0319322	0.984161	0.00530611	0.11056	0.96947
BRK1	Inverse variance weighted	60	0.0392314	0.0356916	1.04001	0.969743	1.11537	0.27169	83.203	0.0206773	-0.0161634	0.0116667	0.171227
BRMS1	Inverse variance weighted	2	0.901806	0.454058	2.46405	1.01192	6.00001	0.0470219	NA	NA	NA	NA	NA
BROX	Inverse variance weighted	6	-0.0749554	0.0973403	0.927785	0.766637	1.12281	0.441279	2.39967	0.791523	-0.00067911	0.0331604	0.984642
BRPF1	Inverse variance weighted	3	-0.343438	0.273949	0.709328	0.414626	1.21349	0.209967	0.425493	0.808361	-0.038361	0.0772139	0.706457
BRPF3	Inverse variance weighted	4	-0.747927	0.283318	0.473347	0.271653	0.824793	0.00829345	1.96081	0.580581	0.0385592	0.0748788	0.657849
BRSK1	Inverse variance weighted	5	-0.455198	0.16467	0.634322	0.459346	0.875952	0.00570448	1.28324	0.864212	0.0135276	0.0972607	0.898194
BRWD1	Inverse variance weighted	14	0.0222575	0.098503	1.02251	0.842983	1.24026	0.821234	10.1321	0.683094	0.00472594	0.0212925	0.828083
BSCL2	Inverse variance weighted	22	0.0386406	0.0690244	1.0394	0.907876	1.18997	0.575609	17.4723	0.682111	-0.0391705	0.0177084	0.0387699
BSG	Inverse variance weighted	13	0.0152639	0.0541181	1.01538	0.913193	1.129	0.777907	9.77572	0.635629	0.025891	0.0227499	0.279271
BSN	Inverse variance weighted	2	-0.258715	0.277328	0.772043	0.448307	1.32956	0.350881	NA	NA	NA	NA	NA
BSPRY	Inverse variance weighted	15	0.146012	0.0798062	1.15721	0.989646	1.35315	0.067313	10.2685	0.742303	-0.0307709	0.0263886	0.264535
BST1	Inverse variance weighted	59	0.0296728	0.0338154	1.03012	0.964056	1.10071	0.380219	41.8447	0.945636	0.00762032	0.0111338	0.496477
BST2	Inverse variance weighted	2	0.342676	0.37414	1.40871	0.676625	2.9329	0.359717	NA	NA	NA	NA	NA
BTAF1	Inverse variance weighted	5	0.0616609	0.15532	1.0636	0.784455	1.44208	0.691373	4.15295	0.385703	-0.0212835	0.0538123	0.718911
BTBD1	Inverse variance weighted	12	0.108562	0.162939	1.11467	0.809938	1.53407	0.505234	13.8505	0.241377	0.0175026	0.0364572	0.641494
BTBD10	Inverse variance weighted	13	0.137889	0.0592625	1.14785	1.02197	1.28923	0.0199785	12.5977	0.398949	-0.0170295	0.0212474	0.439818
BTBD11	Inverse variance weighted	67	0.0449294	0.0317445	1.04595	0.982859	1.1131	0.156967	56.5668	0.789593	0.0126895	0.0130716	0.335261
BTBD17	Inverse variance weighted	9	0.046304	0.114294	1.04739	0.837184	1.31038	0.68538	5.84142	0.66499	-0.0407598	0.033524	0.263453
BTBD2	Inverse variance weighted	10	-0.142457	0.1009	0.867225	0.711613	1.05687	0.157991	11.4669	0.245056	-0.0337453	0.0357904	0.37335
BTBD3	Inverse variance weighted	4	-0.151367	0.187936	0.859533	0.594687	1.24233	0.420579	1.74007	0.628063	-0.0316104	0.0373453	0.486438
BTBD6	Inverse variance weighted	13	-0.0139627	0.0900083	0.986134	0.826646	1.17639	0.876721	2.96316	0.995799	0.00601563	0.0370211	0.873865
BTBD7	Inverse variance weighted	15	0.314031	0.127255	1.36893	1.06674	1.75672	0.0135971	17.1293	0.249355	0.0245918	0.0304807	0.434296
BTBD9	Inverse variance weighted	4	0.344493	0.328227	1.41127	0.741684	2.68537	0.293922	1.26369	0.737773	0.0257176	0.0664348	0.735984
BTD	Inverse variance weighted	3	0.0517682	0.315626	1.05313	0.567304	1.95501	0.869718	0.845739	0.655164	0.125804	0.148315	0.552165
BTF3	Inverse variance weighted	2	0.297901	0.336235	1.34703	0.696895	2.60367	0.375623	NA	NA	NA	NA	NA
BTG1	Inverse variance weighted	5	0.063112	0.211087	1.06515	0.704252	1.61098	0.764951	0.37494	0.984477	-0.0205608	0.0568358	0.741512
BTG2	Inverse variance weighted	26	0.0198017	0.0617141	1.02	0.90379	1.15115	0.748315	28.0574	0.305216	-0.00606471	0.0276783	0.828414
BTLA	Inverse variance weighted	3	-0.173041	0.296199	0.841103	0.470673	1.50307	0.559082	0.798493	0.670825	-0.0475478	0.0979937	0.712408
BTN2A1	Inverse variance weighted	32	0.098767	0.0468464	1.10381	1.00697	1.20996	0.0350034	24.6833	0.781704	0.0143174	0.0167371	0.399093
BTN2A2	Inverse variance weighted	25	0.0592738	0.0664361	1.06107	0.931517	1.20863	0.37229	14.3244	0.938981	0.0149919	0.0165787	0.375218
BTN2A3P	Inverse variance weighted	3	0.101784	0.328994	1.10714	0.580977	2.10984	0.757033	4.96317	0.0836108	0.124217	0.0580108	0.278146
BTN3A1	Inverse variance weighted	30	0.0751814	0.0477466	1.07808	0.981766	1.18384	0.115351	12.5753	0.996546	0.01236	0.0194252	0.529756
BTN3A2	Inverse variance weighted	63	-0.0313022	0.0225495	0.969183	0.927281	1.01298	0.165089	45.7831	0.938917	-0.00158519	0.0121309	0.896464
BTN3A3	Inverse variance weighted	10	-0.0921774	0.136508	0.911943	0.697863	1.1917	0.499515	3.42437	0.945074	0.0180919	0.0318159	0.585203
BTNL10	Inverse variance weighted	2	0.0506946	0.232897	1.052	0.666455	1.66059	0.827686	NA	NA	NA	NA	NA
BTNL3	Inverse variance weighted	42	-0.0132933	0.0284839	0.986795	0.933213	1.04345	0.640717	31.5544	0.855617	0.0133079	0.0117663	0.264782
BTNL8	Inverse variance weighted	24	0.025983	0.0458641	1.02632	0.938089	1.12286	0.571039	16.4913	0.833445	-0.0178578	0.017722	0.32457
BTNL9	Inverse variance weighted	11	0.168443	0.117424	1.18346	0.940157	1.48973	0.151434	4.62918	0.914534	-0.0231718	0.0396487	0.573288
BTRC	Inverse variance weighted	7	0.190077	0.195313	1.20934	0.8247	1.77339	0.330457	6.74508	0.345066	-0.00375225	0.0478506	0.940539
BUB3	Inverse variance weighted	3	0.0667787	0.223496	1.06906	0.689855	1.65671	0.7651	2.03095	0.36223	0.0666023	0.0550938	0.439975
BUD13	Inverse variance weighted	11	0.283565	0.144207	1.32785	1.00092	1.76158	0.0492557	11.6846	0.30672	0.00847595	0.0365776	0.821935
BUD31	Inverse variance weighted	3	-0.0796527	0.215055	0.923437	0.605827	1.40756	0.711097	1.3733	0.503258	-0.0679865	0.157111	0.740006
BX322557.10	Inverse variance weighted	11	0.218875	0.0864383	1.24468	1.0507	1.47446	0.0113364	9.10821	0.521866	0.0306836	0.0272481	0.289261
BYSL	Inverse variance weighted	19	-0.150304	0.0833739	0.860446	0.730726	1.01319	0.0714233	24.9498	0.126304	0.00451032	0.0277185	0.872658
BZRAP1-AS1	Inverse variance weighted	13	0.1101	0.0596534	1.11639	0.993203	1.25486	0.064941	8.20864	0.76862	0.0102009	0.0343693	0.772146
BZRAP1	Inverse variance weighted	9	-0.135726	0.185384	0.873082	0.60709	1.25562	0.464085	12.7189	0.121893	-0.0167992	0.0690014	0.814629
BZW1	Inverse variance weighted	2	-0.0482517	0.352718	0.952894	0.477315	1.90232	0.891189	NA	NA	NA	NA	NA
BZW2	Inverse variance weighted	10	0.232689	0.147811	1.26199	0.944575	1.68607	0.115434	5.54151	0.784783	-0.031984	0.0390478	0.43645
C10orf10	Inverse variance weighted	2	-0.930106	0.325539	0.394512	0.208428	0.746731	0.00427493	NA	NA	NA	NA	NA
C10orf105	Inverse variance weighted	22	0.23362	0.0645013	1.26316	1.11315	1.43339	0.000292408	14.2973	0.856492	0.00851744	0.0201567	0.677124
C10orf11	Inverse variance weighted	38	-0.103285	0.0475845	0.90187	0.82156	0.990031	0.0299643	46.3099	0.140307	0.0100456	0.0223379	0.655615
C10orf116	Inverse variance weighted	4	0.17545	0.296594	1.19178	0.666394	2.13139	0.554153	6.61796	0.0851246	0.11023	0.172777	0.588782
C10orf118	Inverse variance weighted	2	0.228156	0.326246	1.25628	0.662798	2.38118	0.48434	NA	NA	NA	NA	NA
C10orf128	Inverse variance weighted	53	-0.0521234	0.0353562	0.949212	0.88566	1.01732	0.140418	41.6359	0.847635	-0.00189392	0.0140057	0.892966
C10orf2	Inverse variance weighted	2	-0.767272	0.289288	0.464278	0.263349	0.818512	0.00799506	NA	NA	NA	NA	NA
C10orf25	Inverse variance weighted	4	-0.0331251	0.367572	0.967418	0.470685	1.98837	0.928193	5.90156	0.116499	-0.185431	0.142016	0.321642
C10orf32	Inverse variance weighted	61	0.0670808	0.0330424	1.06938	1.00232	1.14093	0.0423421	54.0983	0.690081	-0.00564349	0.0120739	0.641926
C10orf35	Inverse variance weighted	17	0.0701335	0.0970653	1.07265	0.886819	1.29742	0.469963	15.2534	0.506164	0.0412398	0.0207642	0.0656103
C10orf54	Inverse variance weighted	13	-0.106737	0.134392	0.898762	0.690634	1.16961	0.427069	8.69989	0.728327	0.00983317	0.034363	0.780076
C10orf68	Inverse variance weighted	5	-0.108917	0.169578	0.896805	0.643206	1.25039	0.520689	5.12184	0.275023	-0.0613425	0.0408314	0.230024
C10orf76	Inverse variance weighted	10	0.0187285	0.103818	1.0189	0.831309	1.24883	0.85684	2.18721	0.988149	-0.00788386	0.0232494	0.743264
C10orf82	Inverse variance weighted	2	-0.0627205	0.424498	0.939206	0.408715	2.15825	0.882539	NA	NA	NA	NA	NA
C10orf88	Inverse variance weighted	30	-0.191362	0.0665923	0.825834	0.724783	0.940973	0.00405782	31.6615	0.334928	-0.0198098	0.0209525	0.35251
C10orf91	Inverse variance weighted	3	-0.185293	0.205297	0.830861	0.555617	1.24246	0.366759	2.06513	0.356092	0.0714199	0.197571	0.779173
C11orf1	Inverse variance weighted	5	-0.340672	0.199785	0.711293	0.480826	1.05223	0.0881588	1.81387	0.769944	0.0239356	0.0556777	0.69628
C11orf21	Inverse variance weighted	34	0.0414709	0.0325359	1.04234	0.977947	1.11098	0.202443	28.6941	0.681504	0.000259105	0.0143945	0.98575
C11orf24	Inverse variance weighted	2	0.38699	0.269478	1.47254	0.868327	2.49719	0.150982	NA	NA	NA	NA	NA
C11orf35	Inverse variance weighted	17	-0.0718599	0.044954	0.930661	0.85217	1.01638	0.109927	15.6295	0.479102	-0.0518949	0.0233978	0.0424162
C11orf45	Inverse variance weighted	4	0.0780284	0.240728	1.08115	0.67449	1.733	0.745836	0.70822	0.871269	-5.70117e-05	0.066332	0.999392
C11orf48	Inverse variance weighted	5	0.023724	0.127207	1.02401	0.798035	1.31397	0.852054	1.78272	0.775643	-0.019214	0.0488472	0.720349
C11orf49	Inverse variance weighted	4	-0.0896164	0.347944	0.914282	0.462279	1.80824	0.796747	6.89317	0.075382	-0.0889317	0.146927	0.606526
C11orf54	Inverse variance weighted	32	0.0897392	0.0660854	1.09389	0.960993	1.24516	0.174487	39.2329	0.147268	0.00875992	0.0208923	0.677991
C11orf58	Inverse variance weighted	7	0.136755	0.123375	1.14655	0.900271	1.46019	0.267666	1.55678	0.955634	-0.0244783	0.0421144	0.586298
C11orf63	Inverse variance weighted	10	-0.0985264	0.0988894	0.906172	0.746508	1.09999	0.31909	10.4407	0.315996	0.00956499	0.0250821	0.712875
C11orf68	Inverse variance weighted	4	0.179858	0.31953	1.19705	0.639914	2.23924	0.573514	3.08003	0.37945	0.054164	0.0429315	0.334293
C11orf73	Inverse variance weighted	20	-0.206046	0.120463	0.813795	0.642651	1.03052	0.0871819	17.5167	0.554909	-0.0159177	0.027685	0.572436
C11orf74	Inverse variance weighted	2	0.040288	0.416068	1.04111	0.460609	2.35321	0.922861	NA	NA	NA	NA	NA
C11orf75	Inverse variance weighted	45	0.0929307	0.0333911	1.09739	1.02787	1.17161	0.0053842	49.6398	0.25859	0.0096385	0.0180264	0.59562
C11orf80	Inverse variance weighted	19	-0.00801371	0.0897147	0.992018	0.832057	1.18273	0.928824	19.1753	0.381107	0.0234167	0.0203371	0.265494
C11orf82	Inverse variance weighted	10	-0.148351	0.11316	0.862128	0.690635	1.07621	0.189861	5.51193	0.787596	0.00985816	0.0342857	0.781015
C11orf84	Inverse variance weighted	4	-0.155279	0.202675	0.856176	0.575496	1.27375	0.443589	1.80269	0.61435	-0.021409	0.0308856	0.55988
C11orf89	Inverse variance weighted	5	-0.0153902	0.0796	0.984728	0.842479	1.15099	0.846689	2.41803	0.659371	0.0450127	0.0621213	0.5211
C11orf92	Inverse variance weighted	19	-0.00957423	0.0668325	0.990471	0.868866	1.1291	0.886087	9.01064	0.959496	0.00915457	0.0246549	0.714995
C12orf23	Inverse variance weighted	22	0.0636902	0.0693896	1.06576	0.930239	1.22103	0.35869	21.3935	0.435147	-0.0358252	0.0232843	0.139574
C12orf39	Inverse variance weighted	18	-0.0238072	0.0448811	0.976474	0.894246	1.06626	0.5958	17.0684	0.449744	0.0172823	0.0215876	0.43511
C12orf4	Inverse variance weighted	8	0.196655	0.137831	1.21732	0.929142	1.59489	0.153643	1.56003	0.980158	0.00632925	0.0457521	0.894499
C12orf42	Inverse variance weighted	2	-0.237838	0.652258	0.78833	0.219531	2.83088	0.715381	NA	NA	NA	NA	NA
C12orf43	Inverse variance weighted	33	-0.0393904	0.0511154	0.961375	0.869727	1.06268	0.440934	23.2136	0.871455	-0.0146593	0.0193255	0.453853
C12orf44	Inverse variance weighted	7	-0.0580538	0.165502	0.943599	0.682196	1.30517	0.725758	1.53848	0.956897	-0.00289862	0.0382245	0.942494
C12orf45	Inverse variance weighted	5	0.023415	0.147942	1.02369	0.766017	1.36804	0.874243	7.46338	0.113335	0.0382586	0.0663203	0.604464
C12orf49	Inverse variance weighted	9	0.145928	0.134179	1.15711	0.88953	1.50519	0.276786	6.88851	0.548708	0.0422427	0.044998	0.379104
C12orf5	Inverse variance weighted	9	-0.17223	0.102603	0.841785	0.688436	1.02929	0.0932289	4.14221	0.844071	-0.00602603	0.0397782	0.883862
C12orf52	Inverse variance weighted	17	0.0249583	0.051092	1.02527	0.927575	1.13326	0.625197	15.2398	0.507151	0.00186058	0.0183321	0.920504
C12orf57	Inverse variance weighted	13	-0.186425	0.129433	0.82992	0.643963	1.06958	0.149777	10.8819	0.539062	-0.0456952	0.0254902	0.100539
C12orf60	Inverse variance weighted	7	-0.0520102	0.184796	0.949319	0.660861	1.36369	0.778368	11.3627	0.0777929	-0.0614641	0.0679654	0.407273
C12orf65	Inverse variance weighted	2	0.0476359	0.326202	1.04879	0.553374	1.98773	0.883896	NA	NA	NA	NA	NA
C12orf73	Inverse variance weighted	4	0.386955	0.132892	1.47249	1.13483	1.91061	0.00359345	1.05031	0.789081	0.113841	0.175054	0.582211
C12orf75	Inverse variance weighted	47	0.0803226	0.0487044	1.08364	0.984976	1.19218	0.0991101	61.1041	0.0671739	0.035004	0.0122939	0.00662158
C12orf76	Inverse variance weighted	14	-0.468187	0.113722	0.626136	0.501033	0.782477	3.83955e-05	10.2896	0.670096	0.00532227	0.0242653	0.830075
C14orf101	Inverse variance weighted	3	0.0578891	0.205295	1.0596	0.708582	1.5845	0.777959	2.03927	0.360727	0.0578566	0.0453233	0.423047
C14orf119	Inverse variance weighted	2	-0.0106749	0.404684	0.989382	0.447599	2.18695	0.978956	NA	NA	NA	NA	NA
C14orf132	Inverse variance weighted	29	-0.0537835	0.0558264	0.947637	0.849419	1.05721	0.335343	42.5809	0.0381894	-0.0355773	0.0147075	0.0225762
C14orf142	Inverse variance weighted	7	0.106653	0.20633	1.11255	0.742484	1.66706	0.605222	13.8173	0.0317453	-0.015282	0.0530139	0.784712
C14orf159	Inverse variance weighted	37	0.0381956	0.0353924	1.03893	0.969307	1.11356	0.280497	26.2778	0.882665	-0.000593021	0.0132492	0.964554
C14orf166	Inverse variance weighted	3	0.0644724	0.317244	1.0666	0.572738	1.9863	0.838958	1.17879	0.554663	-0.0328726	0.0635309	0.69602
C14orf182	Inverse variance weighted	8	0.216179	0.137652	1.24132	0.947794	1.62576	0.116304	3.39167	0.846563	-0.0130862	0.0405403	0.757803
C14orf183	Inverse variance weighted	4	0.247873	0.195553	1.2813	0.873357	1.87978	0.204959	0.503404	0.918143	0.0194412	0.111743	0.877897
C14orf2	Inverse variance weighted	14	0.100587	0.0872533	1.10582	0.931994	1.31207	0.248984	8.74209	0.792132	0.0101939	0.0271881	0.714247
C14orf64	Inverse variance weighted	6	0.107073	0.230149	1.11302	0.708916	1.74746	0.641764	10.6713	0.0583009	-0.0290804	0.0998797	0.785407
C14orf79	Inverse variance weighted	9	0.173891	0.135618	1.18993	0.912177	1.55224	0.19977	9.2053	0.325274	0.0258241	0.0416378	0.554766
C15orf26	Inverse variance weighted	14	0.124751	0.0722404	1.13287	0.983301	1.30518	0.084187	11.7554	0.5478	0.0275255	0.0395915	0.500149
C15orf38-AP3S2	Inverse variance weighted	3	0.0553228	0.0573439	1.05688	0.944527	1.1826	0.334668	0.56002	0.755776	-0.00741873	0.0354404	0.868633
C15orf38	Inverse variance weighted	47	0.0495498	0.0276145	1.0508	0.995436	1.10924	0.0727585	55.2422	0.164989	-0.000845765	0.0129555	0.948238
C15orf39	Inverse variance weighted	3	-0.157986	0.316219	0.853862	0.459427	1.58693	0.617351	1.31123	0.519124	0.0322132	0.0681305	0.718827
C15orf40	Inverse variance weighted	18	0.00678792	0.089483	1.00681	0.844848	1.19982	0.939533	8.78537	0.946755	-0.0240368	0.0217002	0.284376
C15orf41	Inverse variance weighted	6	0.118134	0.164899	1.12539	0.814592	1.55478	0.473743	1.18358	0.946443	-0.00202623	0.0476757	0.968137
C15orf52	Inverse variance weighted	10	-0.0151693	0.0787943	0.984945	0.843997	1.14943	0.847337	9.48757	0.393537	-0.00132858	0.0449161	0.977127
C15orf54	Inverse variance weighted	6	-0.279663	0.200709	0.756038	0.510149	1.12045	0.163506	8.24184	0.143401	0.0269427	0.0346405	0.480136
C15orf57	Inverse variance weighted	35	-0.0866535	0.0491082	0.916995	0.832847	1.00964	0.0776407	41.7785	0.168736	0.0149479	0.0169718	0.384824
C15orf61	Inverse variance weighted	10	0.0604625	0.111255	1.06233	0.854194	1.32118	0.586814	9.41409	0.39996	-0.0531438	0.0447527	0.269091
C16orf13	Inverse variance weighted	27	-0.0485286	0.0423934	0.95263	0.876674	1.03517	0.252324	32.5541	0.175432	0.00068471	0.0160782	0.96637
C16orf45	Inverse variance weighted	7	0.168554	0.143092	1.18359	0.894128	1.56677	0.23882	3.82988	0.699686	-0.0448487	0.0588749	0.480569
C16orf54	Inverse variance weighted	18	-0.0366389	0.0773569	0.964024	0.828401	1.12185	0.635761	20.6828	0.240802	0.0359863	0.0228909	0.135497
C16orf55	Inverse variance weighted	5	-0.541237	0.188903	0.582028	0.401926	0.842833	0.00416811	2.57573	0.631128	-0.00850122	0.0508099	0.877765
C16orf58	Inverse variance weighted	4	-0.772672	0.398439	0.461777	0.211483	1.0083	0.0524709	5.63177	0.130966	-0.281557	0.128764	0.160315
C16orf62	Inverse variance weighted	17	0.0466376	0.101673	1.04774	0.858438	1.27879	0.646448	14.5047	0.561168	0.0160727	0.0242439	0.517417
C16orf70	Inverse variance weighted	2	-0.0405356	0.190427	0.960275	0.661151	1.39473	0.831431	NA	NA	NA	NA	NA
C16orf72	Inverse variance weighted	27	0.0973304	0.0657	1.10222	0.969047	1.2537	0.13849	31.8986	0.196495	0.0114947	0.0266381	0.669793
C16orf74	Inverse variance weighted	18	-0.0433624	0.0763795	0.957564	0.824427	1.1122	0.570222	5.29112	0.996821	-0.0010883	0.0209797	0.959271
C16orf80	Inverse variance weighted	8	-0.110455	0.146749	0.895426	0.671606	1.19384	0.451641	11.5141	0.117712	-0.0607804	0.0234135	0.0408838
C16orf86	Inverse variance weighted	9	0.0617721	0.0971658	1.06372	0.879262	1.28688	0.524946	3.90199	0.865856	-0.00318786	0.0233109	0.895075
C16orf88	Inverse variance weighted	13	-0.0276089	0.085999	0.972769	0.821875	1.15137	0.748182	5.09999	0.954555	0.000325893	0.0194888	0.986958
C16orf93	Inverse variance weighted	8	0.168415	0.144794	1.18343	0.891026	1.57178	0.244776	3.78323	0.804379	-0.0253537	0.0372587	0.52158
C16orf95	Inverse variance weighted	2	-0.0747968	0.104954	0.927932	0.755401	1.13987	0.476055	NA	NA	NA	NA	NA
C17orf103	Inverse variance weighted	16	-0.0961341	0.0794722	0.908342	0.777323	1.06145	0.226411	9.62921	0.842393	-0.0270226	0.0223081	0.245818
C17orf107	Inverse variance weighted	7	0.098317	0.0980335	1.10331	0.910439	1.33705	0.315913	3.15203	0.789538	0.00264586	0.02672	0.924968
C17orf49	Inverse variance weighted	3	0.19147	0.268899	1.21103	0.714929	2.05138	0.476433	2.05503	0.357895	0.17241	0.127043	0.404281
C17orf51	Inverse variance weighted	14	0.00255267	0.0923991	1.00256	0.836483	1.2016	0.97796	14.5407	0.336894	0.0167142	0.022684	0.475387
C17orf53	Inverse variance weighted	3	0.0182135	0.224033	1.01838	0.656461	1.57983	0.935205	1.02567	0.598796	-0.0555111	0.067185	0.560389
C17orf59	Inverse variance weighted	2	0.809723	0.323423	2.24729	1.19222	4.23606	0.0122936	NA	NA	NA	NA	NA
C17orf62	Inverse variance weighted	16	-0.0669169	0.0584845	0.935273	0.833979	1.04887	0.252548	6.60691	0.967655	0.0137681	0.0221865	0.544859
C17orf66	Inverse variance weighted	4	-0.0282956	0.327862	0.972101	0.511246	1.84839	0.931225	8.53543	0.0361499	-0.0388389	0.206017	0.867863
C17orf67	Inverse variance weighted	14	-0.0748272	0.0568385	0.927904	0.830082	1.03725	0.18801	8.18071	0.831631	-0.0214063	0.0243001	0.395664
C17orf70	Inverse variance weighted	4	0.185177	0.22684	1.20343	0.771491	1.8772	0.41431	3.4764	0.323836	-0.0195691	0.0776974	0.824665
C17orf72	Inverse variance weighted	7	-0.012258	0.175116	0.987817	0.700833	1.39232	0.944194	5.62495	0.466485	0.062185	0.0615424	0.358654
C17orf75	Inverse variance weighted	22	0.0893376	0.0634017	1.09345	0.965673	1.23813	0.158813	15.3251	0.806291	-0.0189959	0.0240318	0.43854
C17orf76-AS1	Inverse variance weighted	15	0.0218149	0.0978308	1.02205	0.843721	1.23808	0.823546	8.44593	0.864826	0.00867576	0.0264319	0.747964
C17orf80	Inverse variance weighted	26	0.038739	0.059426	1.0395	0.925209	1.16791	0.514474	27.8952	0.3127	-0.0278611	0.0186578	0.148398
C17orf85	Inverse variance weighted	2	0.101199	0.36709	1.1065	0.538861	2.27208	0.782794	NA	NA	NA	NA	NA
C17orf89	Inverse variance weighted	11	-0.0759293	0.081109	0.926882	0.790648	1.08659	0.349201	5.61715	0.846338	-0.0369551	0.0360022	0.331468
C17orf97	Inverse variance weighted	62	-0.0412683	0.024104	0.959572	0.915292	1.00599	0.0868793	46.3185	0.918065	-0.0101619	0.0104123	0.33301
C17orf99	Inverse variance weighted	8	0.0010351	0.1264	1.00104	0.781368	1.28246	0.993466	5.76965	0.566889	0.00810977	0.0583166	0.89395
C18orf25	Inverse variance weighted	7	-0.170144	0.156077	0.843543	0.621229	1.14542	0.275658	6.75257	0.344337	0.0105297	0.0492598	0.839179
C18orf32	Inverse variance weighted	2	0.211614	0.312889	1.23567	0.669216	2.2816	0.498836	NA	NA	NA	NA	NA
C18orf54	Inverse variance weighted	7	0.0140316	0.129291	1.01413	0.787117	1.30662	0.913577	5.96013	0.427671	0.0062549	0.0330474	0.857324
C18orf8	Inverse variance weighted	19	0.080415	0.0784918	1.08374	0.929202	1.26397	0.305598	11.1674	0.887119	0.0157337	0.0250894	0.538922
C19orf10	Inverse variance weighted	4	0.184275	0.233652	1.20235	0.760573	1.90072	0.430303	2.09762	0.552394	0.108651	0.084085	0.32547
C19orf12	Inverse variance weighted	47	0.0683533	0.035162	1.07074	0.999436	1.14714	0.0519008	42.2645	0.629479	0.0274925	0.0112804	0.0188192
C19orf18	Inverse variance weighted	3	-0.0326873	0.343516	0.967841	0.493625	1.89763	0.924192	3.10796	0.211404	0.0843505	0.0880447	0.51364
C19orf25	Inverse variance weighted	3	0.257135	0.183012	1.29322	0.903419	1.85121	0.160016	2.54383	0.280294	-0.0702431	0.051056	0.400127
C19orf35	Inverse variance weighted	31	-0.108939	0.0473	0.896786	0.817384	0.983901	0.0212711	35.739	0.216746	-0.0214395	0.0191089	0.271081
C19orf38	Inverse variance weighted	3	-0.110534	0.23168	0.895356	0.568573	1.40996	0.633292	0.345807	0.841219	-0.0132726	0.0535693	0.845381
C19orf40	Inverse variance weighted	33	-0.0772309	0.0466162	0.925676	0.844848	1.01424	0.0975718	34.6336	0.343297	-0.00583575	0.0159521	0.716976
C19orf44	Inverse variance weighted	12	0.105086	0.0866104	1.11081	0.937376	1.31632	0.225009	11.6856	0.387734	-0.0315285	0.0263281	0.258718
C19orf45	Inverse variance weighted	5	-0.0724089	0.128991	0.93015	0.72236	1.19771	0.574561	1.81395	0.769929	0.0211229	0.0649178	0.766267
C19orf47	Inverse variance weighted	4	-0.258436	0.24025	0.772259	0.482234	1.23671	0.282063	3.54223	0.315326	-0.0481307	0.0610756	0.513235
C19orf48	Inverse variance weighted	26	-0.0654062	0.0889068	0.936687	0.786893	1.115	0.461931	32.015	0.157579	0.0142928	0.0293947	0.63121
C19orf52	Inverse variance weighted	7	-0.364058	0.168242	0.694851	0.499668	0.966278	0.0304726	2.67521	0.848366	0.0255824	0.0398724	0.54938
C19orf53	Inverse variance weighted	12	-0.0260881	0.0612234	0.974249	0.864083	1.09846	0.670026	5.52824	0.902918	0.022403	0.0256467	0.402867
C19orf54	Inverse variance weighted	31	0.0227598	0.071299	1.02302	0.889597	1.17646	0.749563	39.9831	0.105193	0.00139825	0.0198312	0.944274
C19orf55	Inverse variance weighted	2	-0.679141	0.340706	0.507053	0.260039	0.988707	0.046225	NA	NA	NA	NA	NA
C19orf59	Inverse variance weighted	4	0.0248781	0.239539	1.02519	0.641069	1.63947	0.917282	1.45795	0.692009	0.111513	0.193732	0.623017
C19orf60	Inverse variance weighted	42	0.0711456	0.0392549	1.07374	0.994223	1.15961	0.0699244	38.7285	0.572047	0.0205961	0.0156685	0.196169
C19orf66	Inverse variance weighted	16	-0.0924279	0.0777446	0.911715	0.782855	1.06179	0.234493	15.7638	0.397918	-0.00658648	0.0226046	0.775035
C19orf71	Inverse variance weighted	7	0.194752	0.0998259	1.21501	0.999094	1.47759	0.0510668	5.95645	0.428086	0.0838789	0.0502605	0.156011
C19orf73	Inverse variance weighted	2	0.021284	0.278732	1.02151	0.591537	1.76403	0.939133	NA	NA	NA	NA	NA
C19orf77	Inverse variance weighted	4	-0.145016	0.331566	0.865009	0.451634	1.65674	0.661846	7.45924	0.0586151	-0.0370675	0.0993967	0.745018
C1D	Inverse variance weighted	5	-0.0413067	0.120825	0.959535	0.757203	1.21593	0.732447	7.2039	0.125498	-0.00128804	0.0458087	0.979334
C1GALT1	Inverse variance weighted	46	0.0645399	0.0372225	1.06667	0.991619	1.1474	0.0829365	29.5166	0.963792	0.00540349	0.0125997	0.670118
C1orf101	Inverse variance weighted	4	-0.0163807	0.158687	0.983753	0.72079	1.34265	0.917783	0.944298	0.814727	0.0196952	0.161738	0.914211
C1orf105	Inverse variance weighted	3	0.410258	0.206708	1.50721	1.00512	2.26009	0.0471752	0.309072	0.856813	0.00284638	0.122374	0.985195
C1orf109	Inverse variance weighted	15	-0.0739901	0.0859907	0.928681	0.784639	1.09917	0.389545	12.2886	0.583136	-0.0423025	0.0279008	0.153409
C1orf112	Inverse variance weighted	18	-0.0945131	0.0835267	0.909816	0.772421	1.07165	0.257832	10.478	0.88238	0.0306708	0.0218993	0.180446
C1orf115	Inverse variance weighted	42	-0.0333497	0.0432186	0.9672	0.888644	1.0527	0.440321	38.9746	0.560977	0.0049975	0.0120544	0.680664
C1orf122	Inverse variance weighted	14	0.182099	0.0871667	1.19973	1.01132	1.42325	0.0367	10.8633	0.622264	0.0383387	0.0273809	0.186775
C1orf123	Inverse variance weighted	6	-0.298617	0.2058	0.741843	0.495601	1.11043	0.146777	4.44758	0.486928	0.0145111	0.0492713	0.783016
C1orf131	Inverse variance weighted	11	-0.0464702	0.137079	0.954593	0.729683	1.24883	0.734607	4.31563	0.931987	-0.0524437	0.04663	0.289825
C1orf134	Inverse variance weighted	17	0.00754886	0.0397762	1.00758	0.932009	1.08927	0.849479	13.8171	0.612337	-0.0127428	0.0287288	0.663695
C1orf138	Inverse variance weighted	4	-0.171618	0.265691	0.842301	0.500387	1.41784	0.518324	1.33814	0.720098	-0.0547848	0.0569484	0.437553
C1orf145	Inverse variance weighted	8	-0.143351	0.0647917	0.86645	0.763118	0.983774	0.0269326	5.40432	0.610749	-0.0370743	0.0410638	0.401398
C1orf147	Inverse variance weighted	5	0.0381365	0.0640992	1.03887	0.916221	1.17794	0.551869	1.85224	0.762911	0.0415385	0.0606798	0.54277
C1orf159	Inverse variance weighted	6	0.194515	0.122785	1.21472	0.954905	1.54523	0.113149	6.03126	0.303189	0.00819323	0.0466081	0.869
C1orf162	Inverse variance weighted	13	-0.0185545	0.136284	0.981617	0.751509	1.28218	0.891707	6.63264	0.880905	0.026272	0.0401277	0.526108
C1orf174	Inverse variance weighted	24	-0.0745982	0.043196	0.928116	0.852773	1.01012	0.0841732	18.9249	0.705577	0.00529484	0.0233342	0.822586
C1orf177	Inverse variance weighted	5	0.188423	0.165668	1.20734	0.872593	1.67052	0.25539	3.1663	0.530391	0.017742	0.0357594	0.653863
C1orf191	Inverse variance weighted	2	0.391932	0.268999	1.47984	0.873449	2.50721	0.145116	NA	NA	NA	NA	NA
C1orf192	Inverse variance weighted	2	-0.418842	0.375093	0.657808	0.315365	1.3721	0.264151	NA	NA	NA	NA	NA
C1orf194	Inverse variance weighted	6	0.205855	0.163571	1.22858	0.891594	1.69292	0.208209	1.49956	0.91312	0.0255083	0.0408251	0.565964
C1orf198	Inverse variance weighted	17	-0.232763	0.0974085	0.792341	0.654631	0.959021	0.0168686	7.27789	0.967526	0.032286	0.0220516	0.163805
C1orf204	Inverse variance weighted	4	0.310466	0.22794	1.36406	0.872584	2.13236	0.173182	4.66841	0.197751	0.0996355	0.0688001	0.284551
C1orf21	Inverse variance weighted	7	0.122462	0.18302	1.13028	0.789578	1.61798	0.50342	3.78381	0.705905	0.0232616	0.0321103	0.50127
C1orf220	Inverse variance weighted	16	-0.0576695	0.09997	0.943962	0.775994	1.14829	0.564029	10.1133	0.812554	0.0179322	0.0284187	0.538206
C1orf226	Inverse variance weighted	5	-0.27235	0.174763	0.761587	0.540702	1.07271	0.119139	2.62913	0.621671	0.030579	0.0844216	0.741202
C1orf228	Inverse variance weighted	21	0.132854	0.0869974	1.14208	0.963039	1.35441	0.126736	20.2247	0.443955	0.00686557	0.0260518	0.794975
C1orf233	Inverse variance weighted	2	-0.229842	0.152716	0.794659	0.589096	1.07195	0.132316	NA	NA	NA	NA	NA
C1orf27	Inverse variance weighted	3	0.0202606	0.319163	1.02047	0.545911	1.90755	0.949384	0.506826	0.776147	-0.0103192	0.114236	0.942648
C1orf43	Inverse variance weighted	8	0.10413	0.164625	1.10974	0.803695	1.53234	0.527042	7.44373	0.384184	-0.0350938	0.0470585	0.484
C1orf54	Inverse variance weighted	2	-0.186322	0.245114	0.830006	0.513377	1.34192	0.447168	NA	NA	NA	NA	NA
C1orf63	Inverse variance weighted	6	0.20216	0.123315	1.22404	0.961234	1.55871	0.101135	4.24813	0.514271	9.02292e-05	0.0555791	0.998782
C1orf85	Inverse variance weighted	82	-0.0673361	0.0219326	0.934881	0.895544	0.975946	0.0021396	117.894	0.0046808	-0.0427452	0.0116196	0.000423382
C1orf86	Inverse variance weighted	36	0.0101191	0.0436433	1.01017	0.927352	1.10038	0.816647	26.8717	0.835833	0.0240604	0.0137381	0.0889008
C1orf87	Inverse variance weighted	38	0.0339938	0.035493	1.03458	0.965053	1.10911	0.338184	27.988	0.857237	0.00784527	0.011379	0.494958
C1QA	Inverse variance weighted	19	0.00474682	0.0804391	1.00476	0.858204	1.17634	0.952943	16.0117	0.591729	-0.0316568	0.0161457	0.0665103
C1QB	Inverse variance weighted	40	0.00706581	0.04427	1.00709	0.92339	1.09838	0.873191	29.2114	0.87292	-0.0223296	0.0148167	0.140064
C1QC	Inverse variance weighted	10	0.0883439	0.126795	1.09236	0.851996	1.40055	0.485961	2.94115	0.966583	-0.0114799	0.0270482	0.68244
C1QL3	Inverse variance weighted	10	-0.108778	0.0735225	0.896929	0.776559	1.03596	0.139	4.76613	0.8542	0.00386542	0.0295389	0.899118
C1QTNF3	Inverse variance weighted	3	0.0746792	0.220546	1.07754	0.69936	1.66022	0.734903	0.637935	0.726899	-0.00388835	0.0613309	0.959693
C1QTNF4	Inverse variance weighted	30	0.0670274	0.0494936	1.06932	0.970465	1.17826	0.175652	40.696	0.0731846	0.0417459	0.0333323	0.220778
C1QTNF6	Inverse variance weighted	20	-0.067058	0.0534477	0.935141	0.842134	1.03842	0.209607	17.6049	0.548955	0.0168486	0.0242129	0.495407
C1R	Inverse variance weighted	3	0.153065	0.422519	1.1654	0.50912	2.66766	0.717151	6.30912	0.0426573	-0.198044	0.0801152	0.244721
C1RL-AS1	Inverse variance weighted	17	-0.0980663	0.0675069	0.906589	0.794232	1.03484	0.146311	18.4004	0.300978	-0.0171359	0.0264652	0.527101
C1RL	Inverse variance weighted	30	-0.0600102	0.0458825	0.941755	0.86076	1.03037	0.190904	30.5686	0.386037	-0.0145892	0.018376	0.433916
C2	Inverse variance weighted	4	-0.0830166	0.189633	0.920336	0.63464	1.33464	0.66155	2.00106	0.572188	-0.10103	0.142159	0.550978
C20orf111	Inverse variance weighted	34	-0.0772769	0.0440991	0.925634	0.848987	1.0092	0.0797141	18.9044	0.976453	0.00346845	0.0177834	0.846596
C20orf112	Inverse variance weighted	3	0.091552	0.244048	1.09587	0.679239	1.76807	0.707557	1.36532	0.505272	0.0867329	0.0894735	0.509901
C20orf118	Inverse variance weighted	2	0.123958	0.372109	1.13197	0.545869	2.34736	0.739041	NA	NA	NA	NA	NA
C20orf194	Inverse variance weighted	3	-0.0656671	0.233696	0.936443	0.592318	1.4805	0.778715	2.1587	0.339816	-0.101133	0.185412	0.682108
C20orf195	Inverse variance weighted	2	0.21004	0.24346	1.23373	0.765564	1.98818	0.388287	NA	NA	NA	NA	NA
C20orf196	Inverse variance weighted	23	0.163878	0.0647806	1.17807	1.0376	1.33756	0.0114148	23.089	0.396719	0.00103648	0.0205189	0.960191
C20orf197	Inverse variance weighted	19	0.222138	0.0675993	1.24874	1.09378	1.42566	0.00101586	14.9976	0.662132	0.0228476	0.0219706	0.312945
C20orf24	Inverse variance weighted	5	0.294941	0.216077	1.34305	0.879352	2.05126	0.172259	5.65881	0.226119	0.0284543	0.0419205	0.545958
C20orf27	Inverse variance weighted	35	-0.0451801	0.0402022	0.955825	0.883401	1.03419	0.26109	24.8431	0.874218	-0.0118446	0.0130399	0.370287
C20orf96	Inverse variance weighted	16	0.0194658	0.0793935	1.01966	0.872716	1.19134	0.806316	15.512	0.415203	-0.00392263	0.0241933	0.873515
C21orf128	Inverse variance weighted	28	-0.0531668	0.0548231	0.948222	0.851616	1.05579	0.332152	34.5986	0.149328	-0.00125584	0.0172526	0.942529
C21orf2	Inverse variance weighted	41	0.0265115	0.0332168	1.02687	0.962142	1.09594	0.424793	46.797	0.213501	-0.00854968	0.013963	0.543887
C21orf49	Inverse variance weighted	11	0.0683417	0.107945	1.07073	0.866555	1.32301	0.526656	5.54437	0.851982	-0.0435026	0.0337706	0.229815
C21orf58	Inverse variance weighted	12	-0.00450629	0.126429	0.995504	0.777006	1.27544	0.971567	8.98701	0.623091	0.0175241	0.0304487	0.577654
C21orf59	Inverse variance weighted	5	0.728793	0.254199	2.07258	1.25931	3.41106	0.00414352	1.60537	0.807827	0.0131384	0.048215	0.80292
C21orf62	Inverse variance weighted	3	0.0227989	0.259636	1.02306	0.615028	1.7018	0.930027	0.546422	0.760932	-0.341837	0.47656	0.603867
C21orf67	Inverse variance weighted	6	-0.042942	0.139941	0.957967	0.728166	1.26029	0.758951	5.13251	0.399924	-0.107948	0.0601448	0.147125
C21orf7	Inverse variance weighted	18	0.0266044	0.085159	1.02696	0.869091	1.21351	0.75473	20.0405	0.272162	0.00445319	0.0245104	0.858111
C21orf91	Inverse variance weighted	6	0.0687569	0.185176	1.07118	0.745137	1.53988	0.71041	1.6764	0.89186	0.000221685	0.0630095	0.997361
C22orf15	Inverse variance weighted	2	0.214155	0.369234	1.23881	0.600769	2.55449	0.561917	NA	NA	NA	NA	NA
C22orf26	Inverse variance weighted	3	-0.0950317	0.181691	0.909344	0.636898	1.29833	0.600946	0.628454	0.730353	-0.0804885	0.125198	0.636261
C22orf28	Inverse variance weighted	5	-0.00282336	0.169283	0.997181	0.715611	1.38954	0.986693	3.55995	0.468821	-0.0755709	0.0540845	0.256741
C22orf29	Inverse variance weighted	26	0.0713052	0.0522364	1.07391	0.9694	1.18968	0.172238	20.0063	0.746493	-0.0380615	0.0212786	0.0862913
C22orf32	Inverse variance weighted	41	-0.00965592	0.0353269	0.990391	0.924135	1.0614	0.784599	60.8833	0.0182304	-0.00286502	0.0198095	0.885749
C22orf34	Inverse variance weighted	26	0.0839929	0.0535346	1.08762	0.979283	1.20795	0.116661	18.2886	0.829895	0.00696823	0.0211512	0.744674
C22orf39	Inverse variance weighted	3	-0.273783	0.387476	0.760497	0.355854	1.62526	0.479827	3.54019	0.170317	-0.011156	0.127908	0.944615
C22orf43	Inverse variance weighted	24	0.0376536	0.0521164	1.03837	0.937541	1.15005	0.469994	30.3202	0.140428	0.0137571	0.0250051	0.587746
C2CD2	Inverse variance weighted	14	0.191319	0.113526	1.21085	0.969289	1.5126	0.0919424	10.3967	0.661218	0.00122318	0.0262077	0.963542
C2CD2L	Inverse variance weighted	30	0.0458834	0.0668137	1.04695	0.918447	1.19344	0.492249	38.4122	0.11344	0.0374074	0.0237545	0.126547
C2CD4D	Inverse variance weighted	2	0.573232	0.246316	1.77399	1.09467	2.87488	0.0199536	NA	NA	NA	NA	NA
C2CD5	Inverse variance weighted	10	-0.104567	0.089308	0.900714	0.756078	1.07302	0.241654	7.92185	0.54204	0.0185518	0.02274	0.438214
C2orf15	Inverse variance weighted	37	-0.0782995	0.0562685	0.924687	0.828129	1.0325	0.164064	46.7067	0.109043	-0.019704	0.0181311	0.284575
C2orf27A	Inverse variance weighted	21	-0.154081	0.0478239	0.857202	0.780504	0.941438	0.00127367	16.0744	0.711999	0.00919469	0.0247662	0.714552
C2orf40	Inverse variance weighted	18	0.11007	0.0706445	1.11636	0.972006	1.28214	0.119213	10.884	0.862528	-0.0171349	0.0180592	0.356827
C2orf42	Inverse variance weighted	13	0.00796249	0.081515	1.00799	0.859154	1.18262	0.922185	19.1515	0.0849373	0.0149416	0.0265211	0.584473
C2orf43	Inverse variance weighted	43	-0.0359367	0.0435104	0.964701	0.885842	1.05058	0.408842	45.7845	0.317955	-0.0167855	0.013142	0.208701
C2orf44	Inverse variance weighted	4	-0.0111798	0.360595	0.988882	0.487753	2.00488	0.975267	2.49801	0.475652	-0.064742	0.23163	0.80611
C2orf47	Inverse variance weighted	2	0.0219932	0.373777	1.02224	0.491344	2.12675	0.953079	NA	NA	NA	NA	NA
C2orf48	Inverse variance weighted	2	0.957286	0.861724	2.60462	0.481094	14.1013	0.266613	NA	NA	NA	NA	NA
C2orf49	Inverse variance weighted	2	-0.114505	0.303886	0.891808	0.491584	1.61787	0.706322	NA	NA	NA	NA	NA
C2orf62	Inverse variance weighted	7	-0.106856	0.133921	0.898655	0.69119	1.16839	0.424927	8.99397	0.173917	0.0218737	0.0554914	0.709698
C2orf68	Inverse variance weighted	4	0.0656191	0.359098	1.06782	0.528235	2.15858	0.855008	8.20836	0.0418962	0.0438637	0.1664	0.81676
C2orf76	Inverse variance weighted	2	-0.0644632	0.160162	0.937571	0.68497	1.28333	0.687326	NA	NA	NA	NA	NA
C2orf82	Inverse variance weighted	4	-0.376255	0.223792	0.686428	0.44269	1.06436	0.0927103	1.453	0.693161	0.041589	0.0431482	0.436812
C2orf88	Inverse variance weighted	5	-0.0146795	0.136031	0.985428	0.754801	1.28652	0.914065	5.79709	0.214823	0.0995529	0.0484316	0.13206
C3	Inverse variance weighted	3	-0.414742	0.252684	0.660511	0.402523	1.08385	0.100726	0.776744	0.67816	-0.0243227	0.100106	0.848261
C3AR1	Inverse variance weighted	49	-0.0216451	0.0258072	0.978587	0.93032	1.02936	0.401625	48.1951	0.46495	-0.00187179	0.0124881	0.881496
C3orf14	Inverse variance weighted	10	-0.0770081	0.101418	0.925882	0.758974	1.1295	0.447665	4.45462	0.879029	-0.0427073	0.0484431	0.403703
C3orf17	Inverse variance weighted	19	-0.0876738	0.0781706	0.91606	0.785929	1.06774	0.262045	10.7557	0.904436	0.00762238	0.0199317	0.706885
C3orf18	Inverse variance weighted	2	0.525997	0.356548	1.69214	0.841274	3.40359	0.140146	NA	NA	NA	NA	NA
C3orf20	Inverse variance weighted	7	-0.0992833	0.143736	0.905486	0.683173	1.20014	0.489734	5.13855	0.52617	0.00501592	0.0310531	0.878002
C3orf35	Inverse variance weighted	2	-0.539654	0.390393	0.58295	0.27122	1.25297	0.166868	NA	NA	NA	NA	NA
C3orf37	Inverse variance weighted	11	0.077175	0.138041	1.08023	0.824164	1.41586	0.576113	9.93845	0.44591	0.0227165	0.0229622	0.348368
C3orf38	Inverse variance weighted	4	-0.0711896	0.168638	0.931285	0.669168	1.29607	0.672919	1.43792	0.696671	-0.00206655	0.076051	0.980789
C3orf52	Inverse variance weighted	4	-0.011122	0.24258	0.98894	0.614726	1.59096	0.963431	1.10292	0.776368	0.0162241	0.0591755	0.809677
C3orf58	Inverse variance weighted	6	-0.233392	0.143759	0.791843	0.597405	1.04957	0.104485	4.15066	0.527936	-0.00483886	0.0476102	0.923937
C3orf62	Inverse variance weighted	3	-0.127123	0.166788	0.880626	0.635065	1.22114	0.445952	0.46786	0.791417	-0.0295507	0.0537371	0.679923
C4A	Inverse variance weighted	23	-0.0774311	0.0442732	0.925491	0.848567	1.00939	0.0803018	31.0614	0.0948658	-0.0248188	0.025692	0.345033
C4B	Inverse variance weighted	23	0.0115193	0.0230321	1.01159	0.966935	1.0583	0.616974	30.3076	0.111177	-0.00391079	0.0186402	0.835842
C4BPA	Inverse variance weighted	36	0.0270756	0.0230516	1.02745	0.982057	1.07493	0.240169	39.942	0.259833	0.00960598	0.0126316	0.452213
C4BPB	Inverse variance weighted	20	-0.233115	0.0838693	0.792062	0.671999	0.933577	0.00544416	15.5475	0.687221	0.0104964	0.0207745	0.619509
C4orf21	Inverse variance weighted	27	0.100839	0.0540613	1.1061	0.994892	1.22974	0.062144	17.0756	0.906781	0.00593144	0.0164488	0.721427
C4orf27	Inverse variance weighted	2	-0.232482	0.137741	0.792564	0.605044	1.0382	0.091445	NA	NA	NA	NA	NA
C4orf29	Inverse variance weighted	3	0.246814	0.168859	1.27994	0.919294	1.78207	0.143835	1.27101	0.529668	0.0240633	0.0397963	0.653781
C4orf3	Inverse variance weighted	34	0.053522	0.0536373	1.05498	0.949702	1.17193	0.318352	25.9907	0.802072	0.0159521	0.016371	0.337161
C4orf32	Inverse variance weighted	29	0.0783949	0.0645205	1.08155	0.953071	1.22735	0.224352	15.1357	0.976968	-0.0141707	0.0180677	0.439685
C4orf33	Inverse variance weighted	26	-0.13151	0.0510407	0.876771	0.793304	0.96902	0.0099787	31.4717	0.173871	-0.00721865	0.0238976	0.765204
C4orf50	Inverse variance weighted	3	0.429337	0.356688	1.53624	0.763554	3.09085	0.228715	5.04708	0.0801755	0.113884	0.054498	0.284144
C4orf52	Inverse variance weighted	4	0.161959	0.226279	1.17581	0.754615	1.8321	0.474146	0.260811	0.967222	-0.0239117	0.0510301	0.685479
C5	Inverse variance weighted	65	0.0910114	0.031911	1.09528	1.02887	1.16597	0.00434395	56.5851	0.733359	0.0176669	0.0124828	0.161904
C5AR1	Inverse variance weighted	3	0.147075	0.316082	1.15844	0.623475	2.15243	0.641713	0.827627	0.661124	0.0646629	0.0752334	0.548011
C5orf17	Inverse variance weighted	12	0.216537	0.0975268	1.24177	1.02571	1.50334	0.0263995	16.7412	0.115768	0.00199222	0.0278353	0.944354
C5orf22	Inverse variance weighted	10	-0.201043	0.0902323	0.817877	0.6853	0.976102	0.0258765	6.35411	0.70402	-0.0157843	0.0327094	0.642334
C5orf30	Inverse variance weighted	5	-0.614761	0.274585	0.54077	0.315705	0.926284	0.0251641	1.24241	0.871067	0.0204518	0.0817105	0.81852
C5orf34	Inverse variance weighted	13	-0.2789	0.127319	0.756615	0.58952	0.971072	0.0284837	10.0723	0.609621	0.0448897	0.039033	0.274514
C5orf4	Inverse variance weighted	50	0.110806	0.038404	1.11718	1.03617	1.20452	0.00391075	32.8513	0.962953	-0.00705681	0.0133597	0.599784
C5orf42	Inverse variance weighted	2	-0.270028	0.54774	0.763358	0.260905	2.23344	0.622022	NA	NA	NA	NA	NA
C5orf45	Inverse variance weighted	3	-0.359686	0.388285	0.697895	0.326044	1.49384	0.354266	5.62454	0.0600685	0.0360018	0.0910581	0.760306
C5orf51	Inverse variance weighted	2	-0.0964037	0.282304	0.908097	0.522192	1.57919	0.732736	NA	NA	NA	NA	NA
C5orf54	Inverse variance weighted	2	-0.30096	0.277912	0.740108	0.429271	1.27602	0.278839	NA	NA	NA	NA	NA
C5orf55	Inverse variance weighted	8	-0.141171	0.100435	0.868341	0.713179	1.05726	0.159842	4.04422	0.77467	-0.0286561	0.062618	0.663319
C5orf56	Inverse variance weighted	2	-0.636001	1.0259	0.529405	0.0708804	3.95413	0.535294	NA	NA	NA	NA	NA
C5orf58	Inverse variance weighted	3	0.203017	0.255423	1.22509	0.74259	2.02111	0.426713	1.08546	0.581159	-0.0835453	0.0831367	0.498439
C5orf63	Inverse variance weighted	3	0.47777	0.285018	1.61247	0.922318	2.81906	0.0936832	0.227902	0.892302	0.017234	0.102321	0.893771
C6orf1	Inverse variance weighted	2	0.386664	0.26109	1.47206	0.882433	2.45567	0.138617	NA	NA	NA	NA	NA
C6orf106	Inverse variance weighted	28	-0.0575389	0.0615927	0.944085	0.836724	1.06522	0.350209	31.877	0.236672	0.0086942	0.0165262	0.603287
C6orf120	Inverse variance weighted	12	0.13947	0.0966851	1.14966	0.951198	1.38954	0.149156	3.78704	0.975738	0.00512398	0.0303472	0.869285
C6orf136	Inverse variance weighted	2	-0.615265	0.940004	0.540498	0.0856339	3.41147	0.512768	NA	NA	NA	NA	NA
C6orf163	Inverse variance weighted	9	0.173177	0.0884048	1.18908	0.999903	1.41404	0.0501238	3.9753	0.859345	0.0311604	0.035909	0.414283
C6orf164	Inverse variance weighted	22	-0.0228991	0.0336301	0.977361	0.915016	1.04395	0.495927	16.1388	0.761802	-0.00643989	0.0210103	0.762384
C6orf170	Inverse variance weighted	3	0.244613	0.573206	1.27713	0.415252	3.92787	0.669564	4.2814	0.117572	0.304706	0.509619	0.656938
C6orf211	Inverse variance weighted	8	0.128577	0.117634	1.13721	0.903043	1.4321	0.274382	7.5593	0.373052	-0.0212363	0.0361486	0.578309
C6orf226	Inverse variance weighted	6	-0.12766	0.187802	0.880153	0.609112	1.2718	0.49666	7.51314	0.185188	0.0767569	0.0415006	0.138063
C6orf3	Inverse variance weighted	24	-0.0621851	0.0240671	0.939709	0.896411	0.985099	0.00977139	23.5304	0.430177	0.00674561	0.018547	0.719552
C6orf48	Inverse variance weighted	20	-0.0813408	0.0593984	0.921879	0.820565	1.0357	0.170871	23.6115	0.211481	-0.0369459	0.0202903	0.0852939
C6orf62	Inverse variance weighted	37	-0.215964	0.0536461	0.805764	0.725343	0.895102	5.6802e-05	28.914	0.793081	-0.024434	0.0163829	0.144806
C6orf70	Inverse variance weighted	2	0.122389	0.175599	1.13019	0.801087	1.5945	0.485816	NA	NA	NA	NA	NA
C6orf89	Inverse variance weighted	3	0.0981075	0.228904	1.10308	0.704305	1.72764	0.668216	0.222258	0.894823	-0.023386	0.0555934	0.746505
C7orf13	Inverse variance weighted	38	0.0255081	0.0485031	1.02584	0.932806	1.12814	0.598953	27.2224	0.880259	0.0215339	0.0143289	0.141607
C7orf25	Inverse variance weighted	33	-0.0251536	0.0610999	0.97516	0.865101	1.09922	0.680574	43.9438	0.0777152	0.0172531	0.0156238	0.277968
C7orf26	Inverse variance weighted	18	0.181013	0.0773416	1.19843	1.02986	1.39459	0.0192611	13.9792	0.668571	0.0171219	0.0179479	0.354286
C7orf29	Inverse variance weighted	20	-0.0298703	0.053094	0.970571	0.874647	1.07702	0.573712	18.4745	0.490982	-0.0196386	0.0215424	0.374014
C7orf34	Inverse variance weighted	20	-0.0868268	0.0543681	0.916836	0.824162	1.01993	0.110262	43.3509	0.00116046	-0.0183307	0.0393114	0.646597
C7orf41	Inverse variance weighted	6	-0.22234	0.150431	0.800643	0.596197	1.0752	0.139403	2.18973	0.822318	0.0295877	0.0354665	0.451067
C7orf43	Inverse variance weighted	21	-0.113272	0.0712212	0.892907	0.776572	1.02667	0.111738	19.1518	0.511979	0.02593	0.0211606	0.235402
C7orf49	Inverse variance weighted	12	0.0200907	0.0923995	1.02029	0.851282	1.22286	0.827871	6.83187	0.812531	-0.0181632	0.0274157	0.522619
C7orf50	Inverse variance weighted	17	-0.110016	0.0841031	0.89582	0.75968	1.05636	0.190836	12.3496	0.719586	-0.0171605	0.023743	0.480946
C7orf53	Inverse variance weighted	35	-0.00868299	0.0495438	0.991355	0.899615	1.09245	0.860876	39.2725	0.245411	-0.00235031	0.0154829	0.880269
C7orf55	Inverse variance weighted	2	0.202382	0.266219	1.22432	0.72658	2.06302	0.447129	NA	NA	NA	NA	NA
C7orf60	Inverse variance weighted	2	0.208912	0.480848	1.23234	0.480201	3.16254	0.66395	NA	NA	NA	NA	NA
C7orf61	Inverse variance weighted	4	-0.135012	0.23154	0.873706	0.554977	1.37548	0.559823	2.33037	0.506728	0.155914	0.112181	0.299064
C7orf73	Inverse variance weighted	23	-0.0637884	0.033812	0.938204	0.878043	1.00249	0.0592192	19.2413	0.630385	-0.00373628	0.0164271	0.822276
C8G	Inverse variance weighted	4	0.00650094	0.175231	1.00652	0.713943	1.419	0.970406	0.438554	0.932168	0.0222908	0.0563578	0.730658
C8orf31	Inverse variance weighted	22	0.0374501	0.065239	1.03816	0.913549	1.17977	0.565937	33.1702	0.0443637	-0.0048492	0.0241757	0.843051
C8orf33	Inverse variance weighted	10	0.023672	0.0906519	1.02395	0.857267	1.22305	0.793992	13.5214	0.140397	0.00513564	0.0305262	0.870572
C8orf37	Inverse variance weighted	2	0.245679	0.200765	1.27849	0.862585	1.89492	0.221061	NA	NA	NA	NA	NA
C8orf40	Inverse variance weighted	34	0.00111125	0.0390839	1.00111	0.927286	1.08082	0.977317	49.5585	0.0320867	0.0357363	0.0256432	0.173043
C8orf42	Inverse variance weighted	5	-0.0421184	0.38672	0.958756	0.449288	2.04593	0.913272	8.38146	0.0785629	-0.147092	0.0606626	0.0937687
C8orf44	Inverse variance weighted	3	-0.335008	0.562072	0.715333	0.237718	2.15255	0.55116	7.58624	0.0225252	0.163133	0.0596339	0.223112
C8orf46	Inverse variance weighted	29	0.0150292	0.072589	1.01514	0.880518	1.17035	0.835974	38.8895	0.0827166	0.00625899	0.0272622	0.820145
C8orf58	Inverse variance weighted	14	-0.11147	0.0918757	0.894518	0.747108	1.07101	0.225028	10.6041	0.643941	-0.000695229	0.0253412	0.978564
C8orf59	Inverse variance weighted	16	0.166585	0.0813642	1.18126	1.00714	1.3855	0.0406186	8.24706	0.913496	-0.00355884	0.0276472	0.899407
C8orf76	Inverse variance weighted	2	0.831298	0.433818	2.2963	0.981193	5.37405	0.0553353	NA	NA	NA	NA	NA
C8orf82	Inverse variance weighted	3	-0.126208	0.461441	0.881432	0.356782	2.17758	0.784463	3.61049	0.164434	0.108884	0.159754	0.619141
C9orf114	Inverse variance weighted	4	0.0318168	0.209614	1.03233	0.684527	1.55684	0.879355	7.31762	0.0624346	-0.365025	0.23086	0.254641
C9orf123	Inverse variance weighted	18	0.182019	0.078286	1.19964	1.02899	1.39858	0.020069	13.1206	0.728077	-0.00482116	0.02616	0.856098
C9orf135	Inverse variance weighted	49	-0.0218448	0.029451	0.978392	0.923514	1.03653	0.458249	44.7544	0.606623	-0.0014262	0.00969197	0.883641
C9orf139	Inverse variance weighted	2	-0.43774	0.964935	0.645493	0.0973919	4.2782	0.650082	NA	NA	NA	NA	NA
C9orf142	Inverse variance weighted	4	-0.245437	0.292747	0.782362	0.440775	1.38867	0.401809	5.03978	0.168908	-0.0804795	0.135171	0.61198
C9orf152	Inverse variance weighted	12	0.150924	0.100966	1.16291	0.954118	1.41739	0.134964	10.751	0.464357	0.0411714	0.0338492	0.251794
C9orf156	Inverse variance weighted	43	0.0254739	0.0509651	1.0258	0.928284	1.13356	0.617196	25.2933	0.980656	-0.0257177	0.017284	0.144417
C9orf16	Inverse variance weighted	2	-0.0839409	0.259671	0.919486	0.552724	1.52961	0.7465	NA	NA	NA	NA	NA
C9orf174	Inverse variance weighted	8	0.0927263	0.140283	1.09716	0.833411	1.44438	0.508616	8.68034	0.276428	0.0480398	0.0361885	0.232621
C9orf3	Inverse variance weighted	11	0.172998	0.140293	1.18886	0.903051	1.56514	0.217532	32.3032	0.000356404	0.0663523	0.0313253	0.0632257
C9orf37	Inverse variance weighted	4	0.130839	0.186547	1.13978	0.790734	1.64291	0.483072	1.86585	0.600712	-0.00838756	0.0433374	0.86441
C9orf40	Inverse variance weighted	11	0.254052	0.152125	1.28924	0.956846	1.7371	0.0949154	18.1547	0.0524088	-0.0266677	0.0293847	0.387776
C9orf41	Inverse variance weighted	3	0.506863	0.292869	1.66008	0.935046	2.94729	0.0835079	2.44537	0.294439	0.567153	1.16452	0.711475
C9orf47	Inverse variance weighted	2	-0.104394	0.411741	0.90087	0.401959	2.01903	0.799849	NA	NA	NA	NA	NA
C9orf64	Inverse variance weighted	16	0.174672	0.119027	1.19086	0.943065	1.50375	0.142239	17.6626	0.280817	0.0115992	0.0339294	0.737532
C9orf66	Inverse variance weighted	14	-0.148761	0.139327	0.861775	0.655838	1.13238	0.28565	21.253	0.0680733	-0.0632004	0.0411841	0.150821
C9orf69	Inverse variance weighted	5	-0.0624447	0.109508	0.939465	0.757993	1.16438	0.568523	2.59374	0.627933	-0.0773164	0.059582	0.285176
C9orf72	Inverse variance weighted	33	-0.0698559	0.0464706	0.932528	0.851345	1.02145	0.13278	40.0139	0.156156	-0.00352177	0.0201965	0.862705
C9orf78	Inverse variance weighted	51	0.0249111	0.0372446	1.02522	0.95305	1.10286	0.503589	62.7816	0.105927	0.00269518	0.0142694	0.850968
C9orf84	Inverse variance weighted	10	-0.463748	0.133418	0.628922	0.484204	0.816893	0.000509162	4.05937	0.907461	0.014689	0.0374925	0.705446
C9orf85	Inverse variance weighted	2	-0.62966	0.727512	0.532773	0.128018	2.21724	0.386765	NA	NA	NA	NA	NA
C9orf89	Inverse variance weighted	42	0.00179503	0.0349715	1.0018	0.93543	1.07287	0.959064	34.9174	0.73679	0.00778034	0.0145146	0.594902
C9orf91	Inverse variance weighted	26	0.146442	0.0712391	1.15771	1.00684	1.33119	0.0398172	20.2909	0.731403	0.013084	0.0180603	0.475786
CA11	Inverse variance weighted	4	-0.150464	0.119172	0.860309	0.681103	1.08667	0.206742	0.569299	0.903423	-0.00936686	0.0572849	0.885144
CA13	Inverse variance weighted	9	0.228412	0.125014	1.2566	0.983521	1.60551	0.0676864	3.39276	0.907351	0.0495489	0.0341869	0.190515
CA15P1	Inverse variance weighted	12	0.0430343	0.0371298	1.04397	0.970698	1.12278	0.246447	15.8132	0.148209	-0.0191803	0.042592	0.662081
CA2	Inverse variance weighted	38	-0.119988	0.0448772	0.886931	0.81225	0.968479	0.00750225	28.781	0.830951	-0.0218368	0.0195538	0.271497
CA4	Inverse variance weighted	4	-0.0496649	0.123028	0.951548	0.747666	1.21103	0.686441	3.00051	0.391547	-0.0442532	0.0582654	0.526861
CA6	Inverse variance weighted	25	0.0525046	0.0808863	1.05391	0.899395	1.23496	0.516263	36.5951	0.0480006	-0.0210028	0.0213971	0.336524
CA8	Inverse variance weighted	16	0.0137203	0.0855084	1.01381	0.857378	1.19879	0.872522	8.31997	0.910315	-0.0475465	0.0391431	0.244577
CAAP1	Inverse variance weighted	3	-0.338452	0.50144	0.712873	0.266795	1.90479	0.499702	5.77025	0.0558477	-0.272778	0.11454	0.253084
CAB39	Inverse variance weighted	10	-0.0354245	0.153807	0.965196	0.71399	1.30478	0.817845	12.411	0.191116	-0.0253665	0.031976	0.450488
CAB39L	Inverse variance weighted	21	-0.0451751	0.115802	0.95583	0.761742	1.19937	0.696458	29.8898	0.0716589	-0.00616039	0.0251689	0.809265
CABIN1	Inverse variance weighted	3	-0.138563	0.268074	0.870609	0.514794	1.47235	0.605239	0.747495	0.688151	0.0219926	0.0554761	0.759722
CABLES2	Inverse variance weighted	17	0.0835308	0.0760173	1.08712	0.936634	1.26178	0.271838	17.004	0.385336	0.0322194	0.02347	0.189994
CABP1	Inverse variance weighted	9	-0.407859	0.153215	0.665073	0.492549	0.898026	0.00776786	2.3366	0.968916	-0.0151422	0.0422359	0.730527
CABP5	Inverse variance weighted	28	0.261599	0.0825249	1.29901	1.10501	1.52707	0.00152467	28.1996	0.400736	0.0212063	0.0203133	0.306114
CABYR	Inverse variance weighted	2	0.111098	0.359173	1.1175	0.552732	2.25935	0.757082	NA	NA	NA	NA	NA
CACFD1	Inverse variance weighted	11	0.168183	0.113778	1.18315	0.946653	1.47874	0.139365	12.7094	0.240374	0.0368226	0.0332301	0.296548
CACHD1	Inverse variance weighted	7	-0.110342	0.163531	0.895528	0.649949	1.2339	0.499838	1.9526	0.924006	-0.0227441	0.050688	0.672421
CACNA1A	Inverse variance weighted	5	0.225346	0.25523	1.25276	0.759645	2.06596	0.377283	1.44804	0.835804	0.0424728	0.0761906	0.616109
CACNA1C-AS1	Inverse variance weighted	3	0.112962	0.0942073	1.11959	0.930825	1.34663	0.230496	0.915919	0.632573	0.0498307	0.0766408	0.632985
CACNA1C-AS2	Inverse variance weighted	2	0.0556571	0.113083	1.05724	0.847058	1.31956	0.622593	NA	NA	NA	NA	NA
CACNA1D	Inverse variance weighted	2	0.046866	0.355833	1.04798	0.52175	2.10496	0.895215	NA	NA	NA	NA	NA
CACNA1E	Inverse variance weighted	16	0.10147	0.117362	1.1068	0.879361	1.39306	0.387264	16.0164	0.380966	0.0535123	0.0309056	0.105333
CACNA1H	Inverse variance weighted	6	0.117613	0.131831	1.12481	0.868684	1.45645	0.372313	6.8746	0.230135	0.0469066	0.0316234	0.212149
CACNA1I	Inverse variance weighted	4	-0.167597	0.215054	0.845694	0.554825	1.28905	0.435787	4.0737	0.253615	0.034115	0.100598	0.766816
CACNA2D3	Inverse variance weighted	16	0.0430562	0.104429	1.044	0.85076	1.28112	0.680119	14.4386	0.492561	-0.000265679	0.0356394	0.994157
CACNA2D4	Inverse variance weighted	3	0.171469	0.334139	1.18705	0.616656	2.28504	0.607835	0.0400939	0.980153	0.0222964	0.121421	0.884386
CACNB2	Inverse variance weighted	9	-0.165533	0.157131	0.847442	0.622812	1.15309	0.292127	1.6799	0.989303	-0.0249245	0.0378563	0.531332
CACNB3	Inverse variance weighted	23	-0.12309	0.0617935	0.884184	0.783327	0.998027	0.0463748	17.0364	0.76135	-0.0119	0.0202694	0.563399
CACNB4	Inverse variance weighted	10	-0.14034	0.16123	0.869062	0.633592	1.19204	0.384061	5.61944	0.777319	-0.0360058	0.0403	0.397699
CACNG6	Inverse variance weighted	6	0.0504178	0.174264	1.05171	0.747411	1.4799	0.772338	0.644641	0.985868	-0.0124453	0.0807319	0.884952
CACUL1	Inverse variance weighted	15	0.0787321	0.078101	1.08191	0.928351	1.26088	0.313416	9.09994	0.824596	-0.0222263	0.0279176	0.440248
CAD	Inverse variance weighted	3	0.471418	0.239408	1.60226	1.00218	2.56167	0.0489419	4.34591	0.113841	0.0328118	0.157424	0.869183
CADM1	Inverse variance weighted	10	0.107384	0.176728	1.11336	0.787412	1.57424	0.543438	19.5771	0.0207095	0.0160772	0.0413819	0.707775
CADM4	Inverse variance weighted	3	0.0250416	0.265734	1.02536	0.609085	1.72613	0.924922	0.586845	0.745707	0.0269795	0.069562	0.764459
CALB1	Inverse variance weighted	8	-0.0996644	0.118538	0.905141	0.717488	1.14187	0.400471	1.6973	0.974684	0.0410247	0.0391593	0.335163
CALCOCO1	Inverse variance weighted	4	-0.220638	0.216999	0.802007	0.524161	1.22713	0.309264	1.09732	0.777721	-0.00656882	0.0464538	0.900507
CALCOCO2	Inverse variance weighted	18	0.282201	0.0755995	1.32605	1.14342	1.53784	0.00018933	15.0284	0.593437	-0.0219248	0.0193317	0.273445
CALCRL	Inverse variance weighted	17	-0.364205	0.156528	0.694749	0.511198	0.944207	0.0199773	36.6127	0.00237679	-0.0179035	0.0444349	0.692695
CALHM2	Inverse variance weighted	21	-0.0536598	0.0568421	0.947755	0.847834	1.05945	0.345162	12.0384	0.914746	-0.00632926	0.0171238	0.715755
CALM1	Inverse variance weighted	9	0.088084	0.143902	1.09208	0.823687	1.44793	0.540465	15.3919	0.0519583	0.048055	0.0472846	0.343322
CALM2	Inverse variance weighted	9	-0.172456	0.146473	0.841595	0.631571	1.12146	0.23904	7.28249	0.506483	0.00535744	0.0266468	0.846374
CALM3	Inverse variance weighted	13	-0.225043	0.113632	0.798482	0.639057	0.997678	0.0476521	9.49133	0.66049	0.000683456	0.0284458	0.981262
CALML4	Inverse variance weighted	32	-0.0285458	0.0572946	0.971858	0.868625	1.08736	0.618323	18.4257	0.963825	0.0120619	0.021864	0.585255
CALML6	Inverse variance weighted	2	-0.14099	0.658638	0.868498	0.23885	3.15801	0.830498	NA	NA	NA	NA	NA
CALU	Inverse variance weighted	14	0.09382	0.123197	1.09836	0.862737	1.39834	0.446331	23.3339	0.0378398	-0.0183615	0.0441743	0.684995
CALY	Inverse variance weighted	2	-0.614402	0.397805	0.540964	0.248056	1.17974	0.122473	NA	NA	NA	NA	NA
CAMK1	Inverse variance weighted	9	-0.28714	0.223253	0.750407	0.484462	1.16234	0.198386	14.3169	0.0738701	-0.0149539	0.0483859	0.766275
CAMK1D	Inverse variance weighted	47	-0.0598826	0.0410312	0.941875	0.869094	1.02075	0.144444	40.2609	0.710514	0.00640742	0.0127002	0.616362
CAMK2D	Inverse variance weighted	25	0.0133775	0.0701898	1.01347	0.883208	1.16294	0.848847	13.285	0.961189	-0.0151718	0.0201364	0.458824
CAMK2G	Inverse variance weighted	2	-0.14473	0.380237	0.865256	0.410658	1.82309	0.703477	NA	NA	NA	NA	NA
CAMK2N1	Inverse variance weighted	11	0.393905	0.146014	1.48276	1.11373	1.97406	0.00698173	13.3524	0.204629	0.00173826	0.0260221	0.948202
CAMK4	Inverse variance weighted	11	-0.10706	0.0954484	0.898472	0.745173	1.08331	0.262012	8.10545	0.618538	-0.0386861	0.0246915	0.151609
CAMKK1	Inverse variance weighted	2	-0.228509	0.18085	0.795719	0.558235	1.13423	0.2064	NA	NA	NA	NA	NA
CAMKK2	Inverse variance weighted	60	-0.0835352	0.0330483	0.919859	0.862164	0.981414	0.0114821	43.5001	0.934795	-0.00826597	0.0127964	0.520852
CAMKMT	Inverse variance weighted	13	0.0264533	0.103723	1.02681	0.837911	1.25829	0.798694	18.8694	0.0917281	0.0724532	0.0364627	0.0723912
CAMLG	Inverse variance weighted	19	0.084091	0.0482868	1.08773	0.989504	1.1957	0.0815977	18.8962	0.398242	0.0400826	0.0151008	0.0166899
CAMSAP1	Inverse variance weighted	3	0.136652	0.15261	1.14643	0.850047	1.54615	0.370556	0.0367004	0.981817	-0.00193457	0.046491	0.973524
CAMSAP2	Inverse variance weighted	20	-0.0402195	0.0627487	0.960579	0.849415	1.08629	0.521548	20.1827	0.383662	0.0153554	0.0212935	0.480092
CAMSAP3	Inverse variance weighted	2	0.0853119	0.254369	1.08906	0.661495	1.79297	0.737334	NA	NA	NA	NA	NA
CAMTA1	Inverse variance weighted	17	0.297541	0.0782145	1.34654	1.15516	1.56963	0.000142279	9.26865	0.901939	0.00960912	0.0207421	0.649824
CAMTA2	Inverse variance weighted	12	0.00288658	0.111619	1.00289	0.805827	1.24815	0.979368	14.9482	0.184881	-0.050982	0.0387981	0.218179
CAND1	Inverse variance weighted	2	0.0640599	0.438406	1.06616	0.451484	2.51768	0.883827	NA	NA	NA	NA	NA
CAND2	Inverse variance weighted	29	-0.103678	0.0638754	0.901515	0.795429	1.02175	0.104561	26.8289	0.527579	-0.00737725	0.0156385	0.640906
CANT1	Inverse variance weighted	11	0.275001	0.113456	1.31653	1.05404	1.6444	0.0153568	10.7306	0.378892	0.0504497	0.0252337	0.0766392
CANX	Inverse variance weighted	11	-0.197345	0.113066	0.820907	0.657734	1.02456	0.0809148	18.5851	0.04586	-0.115968	0.0318877	0.00542815
CAP1	Inverse variance weighted	4	-0.0457056	0.127374	0.955323	0.744264	1.22623	0.719723	0.585039	0.899849	0.0907821	0.122431	0.535641
CAPG	Inverse variance weighted	41	-0.0462011	0.029874	0.95485	0.900546	1.01243	0.121976	35.2938	0.681883	-0.0219	0.0142155	0.131497
CAPN1	Inverse variance weighted	36	0.101033	0.0451039	1.10631	1.01271	1.20857	0.0250912	33.8526	0.523387	0.00113269	0.0157849	0.943215
CAPN10	Inverse variance weighted	5	-0.309736	0.189268	0.733641	0.506262	1.06314	0.101737	2.72366	0.605082	0.0263297	0.0440195	0.591894
CAPN11	Inverse variance weighted	16	-0.00697518	0.070404	0.993049	0.865051	1.13999	0.92108	9.91038	0.825339	0.00403746	0.0251661	0.874832
CAPN12	Inverse variance weighted	58	0.0556079	0.0356499	1.05718	0.985835	1.13369	0.118799	48.9817	0.766126	-0.0256487	0.0113702	0.0280092
CAPN13	Inverse variance weighted	5	-0.0571611	0.277181	0.944442	0.548573	1.62598	0.836617	2.03365	0.72957	-0.0398534	0.106443	0.732997
CAPN2	Inverse variance weighted	7	0.133461	0.167323	1.14278	0.823253	1.58631	0.425088	13.0811	0.0417662	0.00737554	0.0424015	0.868732
CAPN3	Inverse variance weighted	6	-0.165183	0.102164	0.847738	0.693902	1.03568	0.105912	5.99507	0.306699	-0.00154711	0.0373077	0.968909
CAPN5	Inverse variance weighted	7	-0.0883572	0.162792	0.915434	0.665358	1.2595	0.587294	2.57176	0.860351	-0.0482337	0.0514862	0.391856
CAPN8	Inverse variance weighted	10	0.0194707	0.123006	1.01966	0.80122	1.29766	0.874227	5.87885	0.751979	-0.015054	0.034684	0.675733
CAPNS1	Inverse variance weighted	18	0.107354	0.116336	1.11333	0.886332	1.39846	0.356114	25.512	0.0838221	-0.0145942	0.0328647	0.66294
CAPRIN2	Inverse variance weighted	15	0.0523611	0.10486	1.05376	0.857988	1.29419	0.617538	15.8005	0.325708	-0.0121146	0.0308907	0.701282
CAPS	Inverse variance weighted	22	0.165219	0.0523141	1.17965	1.06469	1.30703	0.00158741	20.6458	0.480749	0.00550211	0.0236672	0.818529
CAPS2	Inverse variance weighted	3	0.550818	0.206915	1.73467	1.15635	2.60224	0.00776669	0.775284	0.678655	-0.0245666	0.0869918	0.82478
CAPZA1	Inverse variance weighted	2	-0.665313	0.290148	0.514113	0.291125	0.907899	0.0218475	NA	NA	NA	NA	NA
CAPZA2	Inverse variance weighted	19	-0.0419761	0.0777961	0.958893	0.823282	1.11684	0.589496	20.0273	0.331284	0.00593047	0.0205252	0.776125
CAPZB	Inverse variance weighted	4	0.878498	0.515734	2.40728	0.876042	6.61498	0.0884947	11.2647	0.0103773	0.100965	0.0848087	0.355997
CARD11	Inverse variance weighted	35	-0.0411744	0.0737971	0.959662	0.830426	1.10901	0.576885	43.2188	0.133572	0.0287659	0.0162408	0.0857612
CARD16	Inverse variance weighted	31	-0.0295485	0.0424388	0.970884	0.893393	1.0551	0.486265	32.6123	0.339612	0.00096223	0.0157198	0.951611
CARD17	Inverse variance weighted	5	0.100301	0.198119	1.1055	0.749752	1.63006	0.612669	4.1096	0.391377	0.107467	0.0625467	0.184259
CARD6	Inverse variance weighted	6	0.0397697	0.240357	1.04057	0.649644	1.66674	0.868581	7.94145	0.159492	0.0136106	0.0478419	0.790155
CARD8	Inverse variance weighted	68	-0.0143068	0.0294029	0.985795	0.93059	1.04427	0.626557	79.9163	0.133935	0.00219163	0.0136192	0.872646
CARD9	Inverse variance weighted	45	-0.0329011	0.0266201	0.967634	0.918442	1.01946	0.216477	38.0007	0.725471	0.00771773	0.0171927	0.655762
CARHSP1	Inverse variance weighted	45	0.0402871	0.051732	1.04111	0.940722	1.15221	0.436118	67.4913	0.0129102	-0.00972619	0.0165024	0.558689
CARKD	Inverse variance weighted	26	-0.0364833	0.0452842	0.964174	0.882285	1.05366	0.420444	16.8528	0.887063	-0.0172289	0.0169228	0.31879
CARM1	Inverse variance weighted	10	-0.222024	0.0979772	0.800896	0.660961	0.970456	0.0234464	5.41348	0.796879	0.0732171	0.0571979	0.23639
CARNS1	Inverse variance weighted	9	0.276623	0.134113	1.31867	1.01386	1.71512	0.0391504	8.44848	0.39093	-0.0414724	0.0384342	0.316337
CARS	Inverse variance weighted	11	0.112474	0.112999	1.11904	0.896727	1.39648	0.319564	7.1756	0.70877	0.0172144	0.0275281	0.547274
CARS2	Inverse variance weighted	15	0.0326556	0.0585539	1.03319	0.921171	1.15884	0.577048	7.88703	0.895128	0.00550001	0.0267203	0.840107
CASC1	Inverse variance weighted	4	-0.248571	0.18061	0.779915	0.547405	1.11118	0.168733	2.77998	0.426806	-0.0697062	0.0656539	0.399616
CASC3	Inverse variance weighted	16	-0.317453	0.110785	0.728001	0.585909	0.904553	0.00416361	17.538	0.28773	0.00473569	0.023541	0.843461
CASD1	Inverse variance weighted	5	0.193325	0.237039	1.21328	0.762409	1.93078	0.414739	2.14048	0.70994	0.0533367	0.0659342	0.477753
CASKIN2	Inverse variance weighted	2	0.216661	0.546675	1.24192	0.425359	3.62605	0.691866	NA	NA	NA	NA	NA
CASP1	Inverse variance weighted	13	0.0969837	0.0880332	1.10184	0.927223	1.30935	0.270604	11.6633	0.473082	-0.0188952	0.0253781	0.472153
CASP10	Inverse variance weighted	8	-0.225426	0.174229	0.798176	0.567273	1.12307	0.195718	2.90781	0.893397	-0.00646721	0.0534074	0.907572
CASP16	Inverse variance weighted	3	-0.399311	0.217455	0.670782	0.438006	1.02727	0.0663139	1.87784	0.39105	-0.0563073	0.0906938	0.646288
CASP1P2	Inverse variance weighted	16	0.0358971	0.0446007	1.03655	0.949784	1.13124	0.420903	7.77689	0.932416	0.0149383	0.0334153	0.661678
CASP2	Inverse variance weighted	4	0.0992655	0.241874	1.10436	0.687421	1.77418	0.681511	0.801118	0.8492	-0.0264392	0.0522285	0.662987
CASP3	Inverse variance weighted	20	0.284758	0.0937526	1.32944	1.10628	1.59762	0.00238681	31.845	0.0325341	-0.0186982	0.0222186	0.411079
CASP4	Inverse variance weighted	7	-0.263237	0.235546	0.76856	0.48437	1.21949	0.263755	12.1173	0.0594034	0.0168871	0.0855197	0.85124
CASP5	Inverse variance weighted	29	0.0594351	0.0594207	1.06124	0.944566	1.19232	0.317194	22.8161	0.742188	-0.0145162	0.016768	0.394278
CASP6	Inverse variance weighted	4	0.407427	0.219421	1.50295	0.977615	2.31057	0.0633361	1.89639	0.594187	0.0203097	0.0875621	0.838152
CASP7	Inverse variance weighted	56	0.0656704	0.0340259	1.06787	0.99898	1.14152	0.0536052	40.1082	0.934209	-0.0130433	0.0138508	0.350542
CASP8	Inverse variance weighted	19	-0.0226039	0.0980489	0.97765	0.806719	1.1848	0.817674	21.8059	0.240715	0.00998208	0.0259583	0.705344
CASP9	Inverse variance weighted	25	0.0233148	0.0569404	1.02359	0.915497	1.14444	0.682202	24.9805	0.406818	0.00753661	0.0212982	0.726667
CASQ1	Inverse variance weighted	33	-0.0381884	0.0519304	0.962532	0.869383	1.06566	0.46211	26.7336	0.730286	-0.00143395	0.0148104	0.923492
CASS4	Inverse variance weighted	3	-0.180852	0.463859	0.834559	0.336212	2.07158	0.696621	3.15336	0.20666	-0.0350173	0.105027	0.795122
CAST	Inverse variance weighted	51	0.0207563	0.0283412	1.02097	0.965806	1.07929	0.463941	47.1909	0.586792	-0.0266337	0.0124596	0.037563
CASZ1	Inverse variance weighted	9	-0.153647	0.134461	0.857575	0.658896	1.11616	0.253169	3.714	0.881962	0.0200414	0.0475614	0.686116
CAT	Inverse variance weighted	38	-0.00434393	0.0338686	0.995665	0.931717	1.064	0.897945	33.7302	0.623141	-0.00310768	0.0126898	0.807928
CATSPER1	Inverse variance weighted	5	0.124508	0.193392	1.13259	0.775273	1.65459	0.519698	1.51421	0.824121	-0.0491693	0.109819	0.684703
CATSPER2	Inverse variance weighted	5	-0.188491	0.116258	0.828208	0.659445	1.04016	0.104951	1.19215	0.879389	0.000589643	0.0405809	0.989319
CATSPER2P1	Inverse variance weighted	4	0.0188885	0.0274655	1.01907	0.96566	1.07543	0.49163	3.45806	0.326242	0.0439482	0.0321212	0.304682
CATSPERB	Inverse variance weighted	11	-0.104083	0.0814058	0.901151	0.768251	1.05704	0.201049	7.46841	0.680606	0.00631674	0.0236464	0.795387
CATSPERG	Inverse variance weighted	13	0.0360992	0.138261	1.03676	0.790655	1.35947	0.79402	22.7197	0.030202	0.0312746	0.0326888	0.359254
CAV1	Inverse variance weighted	3	-0.259194	0.353503	0.771673	0.385945	1.54291	0.463426	0.030134	0.985046	0.0140081	0.161156	0.944802
CAV2	Inverse variance weighted	31	-0.00209193	0.0550897	0.99791	0.895774	1.11169	0.969709	29.1619	0.509106	-0.0236574	0.0163141	0.157756
CBFA2T3	Inverse variance weighted	10	0.176544	0.127961	1.19309	0.928431	1.53319	0.167688	3.82917	0.922292	0.020847	0.0277461	0.473963
CBL	Inverse variance weighted	11	-0.0672059	0.0950892	0.935003	0.776017	1.12656	0.479711	14.6504	0.145338	-0.0152633	0.0398906	0.710874
CBLB	Inverse variance weighted	26	0.0599439	0.0579984	1.06178	0.947685	1.1896	0.301349	12.2152	0.984749	0.00120696	0.016783	0.943265
CBLL1	Inverse variance weighted	7	0.00972043	0.159224	1.00977	0.739073	1.37961	0.95132	7.7787	0.254769	-0.145399	0.0681859	0.0861425
CBLN3	Inverse variance weighted	63	-0.133176	0.028568	0.875311	0.827646	0.92572	3.13557e-06	66.574	0.322535	-0.00428343	0.0107479	0.691625
CBR1	Inverse variance weighted	18	-0.106473	0.0839359	0.899	0.762626	1.05976	0.204619	14.2363	0.65031	-0.0140083	0.0226756	0.545421
CBR3-AS1	Inverse variance weighted	7	-0.0534489	0.075252	0.947954	0.817959	1.09861	0.47754	6.51774	0.367753	0.00880767	0.0495276	0.865834
CBR3	Inverse variance weighted	49	-0.0492171	0.0323218	0.951974	0.893537	1.01423	0.127829	37.4444	0.864082	-0.00640895	0.0122958	0.604653
CBR4	Inverse variance weighted	15	-0.0871179	0.0803937	0.916569	0.782948	1.07299	0.278524	15.9719	0.315094	0.00219422	0.0187319	0.908541
CBS	Inverse variance weighted	51	-0.0614039	0.0346714	0.940443	0.878658	1.00657	0.0765565	29.3405	0.991314	-0.00446504	0.0134484	0.741296
CBWD1	Inverse variance weighted	14	0.00405314	0.0549768	1.00406	0.901494	1.1183	0.94123	16.5056	0.222902	0.0122247	0.0382652	0.754861
CBWD2	Inverse variance weighted	4	-0.0595476	0.199112	0.942191	0.637751	1.39196	0.76489	9.77948	0.0205367	0.0718886	0.138953	0.65644
CBX1	Inverse variance weighted	10	-0.107423	0.0854325	0.898145	0.75967	1.06186	0.208606	9.27034	0.412703	-0.0231305	0.0407046	0.585455
CBX3	Inverse variance weighted	2	0.75845	0.427857	2.13496	0.922978	4.93844	0.0762832	NA	NA	NA	NA	NA
CBX3P2	Inverse variance weighted	4	0.148464	0.122814	1.16005	0.911876	1.47577	0.226719	2.61779	0.454379	0.0651843	0.0715837	0.458626
CBX4	Inverse variance weighted	10	-0.293842	0.136867	0.745394	0.57001	0.974741	0.0317996	6.9336	0.644033	-0.00882069	0.0306138	0.780573
CBX5	Inverse variance weighted	2	0.209971	0.552165	1.23364	0.418001	3.64084	0.703746	NA	NA	NA	NA	NA
CBX6	Inverse variance weighted	30	0.00324974	0.0531095	1.00326	0.904073	1.11332	0.951208	18.3186	0.93752	0.00753674	0.0166662	0.654596
CBX7	Inverse variance weighted	3	-0.372035	0.254589	0.68933	0.418521	1.13537	0.143928	1.79749	0.40708	0.0865945	0.0652695	0.411185
CBY1	Inverse variance weighted	2	-0.562232	0.440348	0.569935	0.240433	1.35101	0.201676	NA	NA	NA	NA	NA
CC2D1B	Inverse variance weighted	6	-0.0558985	0.149149	0.945635	0.705936	1.26672	0.707822	1.12448	0.951914	-0.0063163	0.0352864	0.866638
CC2D2A	Inverse variance weighted	3	0.556417	0.272835	1.74441	1.0219	2.97776	0.0414111	1.71127	0.425013	0.180367	0.188285	0.51367
CC2D2B	Inverse variance weighted	11	0.0932756	0.157366	1.09776	0.806412	1.49438	0.553361	19.7668	0.0315372	0.0026601	0.0389578	0.947055
CCBL1	Inverse variance weighted	8	-0.332972	0.126061	0.71679	0.559869	0.917693	0.00825747	2.61339	0.918319	0.00926143	0.0318973	0.781321
CCBL2	Inverse variance weighted	40	0.0768771	0.0461036	1.07991	0.986605	1.18204	0.0954181	19.3739	0.996409	0.012	0.0186399	0.523584
CCBP2	Inverse variance weighted	2	-0.581533	0.690195	0.559041	0.144523	2.16247	0.399473	NA	NA	NA	NA	NA
CCDC101	Inverse variance weighted	55	0.00680461	0.0305041	1.00683	0.948396	1.06886	0.823479	48.3443	0.691352	-0.0160431	0.0165547	0.336901
CCDC102A	Inverse variance weighted	12	-0.291897	0.0925795	0.746845	0.62291	0.895439	0.00161637	9.68185	0.559211	0.0403557	0.025109	0.139086
CCDC104	Inverse variance weighted	13	0.221398	0.121472	1.24782	0.983452	1.58325	0.0683598	8.84134	0.716419	-0.0208448	0.032074	0.529096
CCDC106	Inverse variance weighted	2	-0.784557	0.346551	0.456322	0.231356	0.900038	0.02358	NA	NA	NA	NA	NA
CCDC107	Inverse variance weighted	2	-0.0511344	0.250145	0.950151	0.581922	1.55139	0.838026	NA	NA	NA	NA	NA
CCDC109B	Inverse variance weighted	12	0.0976235	0.054142	1.10255	0.991541	1.22598	0.0713723	7.14922	0.786874	0.000635499	0.0296156	0.983302
CCDC111	Inverse variance weighted	5	0.527329	0.0951901	1.6944	1.40601	2.04194	3.02904e-08	1.91742	0.750944	0.0515278	0.0484712	0.36574
CCDC112	Inverse variance weighted	9	-0.11633	0.126176	0.890181	0.695144	1.13994	0.356548	9.43338	0.307065	0.00975739	0.0385542	0.807476
CCDC114	Inverse variance weighted	8	0.207052	0.132325	1.23005	0.949041	1.59426	0.117646	4.28022	0.746995	0.0267008	0.0423443	0.551572
CCDC115	Inverse variance weighted	18	-0.170472	0.0681612	0.843267	0.737811	0.963796	0.0123839	15.8069	0.53756	-0.00605801	0.0220163	0.786714
CCDC117	Inverse variance weighted	9	0.371905	0.20057	1.45049	0.979011	2.14904	0.0637052	20.6687	0.00808149	0.0195102	0.0784137	0.81065
CCDC12	Inverse variance weighted	5	0.221641	0.0948198	1.24812	1.03644	1.50304	0.0194135	0.839977	0.93301	0.000623467	0.027325	0.983229
CCDC122	Inverse variance weighted	21	-0.0793016	0.0819934	0.923761	0.786621	1.08481	0.333459	16.7192	0.671123	-0.0180041	0.0239565	0.461539
CCDC124	Inverse variance weighted	3	-0.0640586	0.192377	0.93795	0.643318	1.36752	0.739146	1.66084	0.435866	-0.0185903	0.0795851	0.853911
CCDC125	Inverse variance weighted	21	0.0352332	0.058386	1.03586	0.923852	1.16145	0.546208	11.4459	0.933828	0.00136668	0.0282809	0.961961
CCDC126	Inverse variance weighted	29	-0.30352	0.0732492	0.738215	0.639487	0.852185	3.41808e-05	33.6176	0.213746	0.00164701	0.0182679	0.928827
CCDC127	Inverse variance weighted	28	-0.158437	0.0405626	0.853477	0.78825	0.924101	9.38441e-05	9.74797	0.99905	-0.0124259	0.0228358	0.590981
CCDC13-AS1	Inverse variance weighted	9	0.107935	0.0656665	1.11398	0.979443	1.26699	0.100242	13.104	0.10832	0.0272018	0.0487846	0.594499
CCDC13	Inverse variance weighted	13	-0.048584	0.164734	0.952577	0.689725	1.3156	0.768052	27.4403	0.00667438	-0.121074	0.0292943	0.00166354
CCDC130	Inverse variance weighted	11	-0.0581908	0.134997	0.94347	0.724129	1.22925	0.666431	12.4446	0.256403	0.102091	0.0975329	0.322519
CCDC132	Inverse variance weighted	4	-0.227733	0.341938	0.796337	0.407412	1.55654	0.505407	6.95989	0.0731872	-0.0198471	0.0930895	0.850926
CCDC134	Inverse variance weighted	23	0.0153924	0.0962004	1.01551	0.841003	1.22623	0.872878	29.2822	0.136978	0.0238976	0.0356045	0.509412
CCDC135	Inverse variance weighted	8	-0.0549942	0.12327	0.946491	0.743338	1.20516	0.655506	7.53467	0.375406	0.00857919	0.0352104	0.815615
CCDC136	Inverse variance weighted	11	-0.119978	0.109708	0.88694	0.715334	1.09971	0.274128	9.23164	0.51027	-0.0197229	0.0331141	0.566114
CCDC137	Inverse variance weighted	4	0.119967	0.327796	1.12746	0.593029	2.14351	0.71438	11.3997	0.00974972	0.108412	0.0950007	0.372023
CCDC138	Inverse variance weighted	3	0.000162008	0.311146	1.00016	0.543522	1.84045	0.999585	0.259099	0.878491	0.0453507	0.0890963	0.700262
CCDC141	Inverse variance weighted	5	-0.399798	0.209875	0.670455	0.444346	1.01162	0.0567881	0.390378	0.983257	0.00846093	0.0934445	0.933561
CCDC144A	Inverse variance weighted	3	0.256648	0.158461	1.29259	0.947493	1.76338	0.105312	0.3209	0.85176	-0.0642486	0.118786	0.684356
CCDC144B	Inverse variance weighted	6	-0.01367	0.193505	0.986423	0.675069	1.44138	0.943681	9.84405	0.0797765	0.0257801	0.0476677	0.617336
CCDC146	Inverse variance weighted	61	0.0308092	0.0283197	1.03129	0.975605	1.09015	0.276636	52.7793	0.734371	0.00706333	0.010217	0.492069
CCDC147	Inverse variance weighted	6	0.224716	0.166202	1.25197	0.903897	1.73407	0.176354	1.14536	0.95001	0.00337535	0.0499465	0.949364
CCDC149	Inverse variance weighted	16	-0.125069	0.103458	0.882436	0.720474	1.08081	0.226703	20.5756	0.150947	-0.0119906	0.0291091	0.686635
CCDC15	Inverse variance weighted	27	-0.066205	0.0539147	0.935939	0.842082	1.04026	0.219463	16.0158	0.935823	-0.0236382	0.0156321	0.143033
CCDC151	Inverse variance weighted	8	0.220222	0.116896	1.24635	0.991145	1.56728	0.0595773	7.49536	0.379184	-0.0625718	0.0302524	0.0840821
CCDC152	Inverse variance weighted	23	-0.144709	0.0557116	0.865274	0.775766	0.965109	0.00939126	22.2616	0.444372	-0.00165669	0.0219853	0.940646
CCDC153	Inverse variance weighted	2	0.0469789	0.569682	1.0481	0.343146	3.2013	0.934277	NA	NA	NA	NA	NA
CCDC154	Inverse variance weighted	11	-0.164151	0.123406	0.848614	0.666293	1.08082	0.183462	18.1136	0.0530772	0.0418931	0.0360901	0.275589
CCDC157	Inverse variance weighted	7	-0.165166	0.180085	0.847753	0.595632	1.20659	0.359059	2.48182	0.870496	-0.0102042	0.0605712	0.87282
CCDC159	Inverse variance weighted	11	-0.0566816	0.044553	0.944895	0.865883	1.03112	0.203291	9.61551	0.474848	0.00099313	0.0271533	0.971622
CCDC162P	Inverse variance weighted	3	0.273541	0.248126	1.31461	0.808329	2.138	0.270275	0.873147	0.646247	-0.242192	0.259674	0.522167
CCDC163P	Inverse variance weighted	43	-0.110726	0.0407927	0.895184	0.826397	0.969696	0.00664018	45.2445	0.338104	0.00607595	0.0152787	0.692932
CCDC167	Inverse variance weighted	79	0.0015301	0.0280272	1.00153	0.947998	1.05809	0.956462	52.2483	0.989013	-0.00216876	0.0097428	0.824435
CCDC17	Inverse variance weighted	7	0.310605	0.225159	1.36425	0.877475	2.12106	0.167743	9.47587	0.148531	0.102348	0.0386993	0.0457172
CCDC170	Inverse variance weighted	12	0.0605143	0.0896402	1.06238	0.891205	1.26644	0.499625	12.0465	0.360155	-0.0293907	0.0233301	0.236357
CCDC171	Inverse variance weighted	7	-0.13707	0.139476	0.871909	0.663356	1.14603	0.325732	3.65628	0.723074	0.00302195	0.0381984	0.940012
CCDC174	Inverse variance weighted	10	0.20548	0.0877674	1.22811	1.03402	1.45864	0.0192225	4.58789	0.868653	0.0335506	0.0212051	0.152262
CCDC176	Inverse variance weighted	7	0.155459	0.142495	1.16819	0.883529	1.54458	0.275281	2.33247	0.886726	0.0186637	0.11009	0.872024
CCDC18	Inverse variance weighted	6	0.044916	0.169098	1.04594	0.750876	1.45695	0.79053	4.29643	0.507573	0.105907	0.0688859	0.199005
CCDC19	Inverse variance weighted	4	0.00418884	0.170972	1.0042	0.718265	1.40396	0.980454	2.98948	0.39325	0.0710118	0.114616	0.598722
CCDC23	Inverse variance weighted	73	-0.00402381	0.0209631	0.995984	0.955891	1.03776	0.847784	65.2481	0.700291	-0.0240241	0.0128316	0.0652889
CCDC24	Inverse variance weighted	42	0.0975253	0.0407723	1.10244	1.01777	1.19416	0.016759	36.5365	0.669176	0.0211315	0.0144905	0.152566
CCDC25	Inverse variance weighted	25	0.10676	0.0808085	1.11267	0.949685	1.30362	0.186451	16.6938	0.861425	-0.000989438	0.0233972	0.966633
CCDC28A	Inverse variance weighted	13	0.0429583	0.0834733	1.04389	0.886345	1.22945	0.606808	10.617	0.561992	0.00695358	0.0260409	0.794389
CCDC3	Inverse variance weighted	22	-0.0292271	0.0601349	0.971196	0.863215	1.09268	0.626949	18.954	0.588092	0.00666095	0.0165631	0.691834
CCDC34	Inverse variance weighted	2	-0.370891	0.327654	0.690119	0.363094	1.31168	0.257651	NA	NA	NA	NA	NA
CCDC40	Inverse variance weighted	6	0.101675	0.157918	1.10702	0.812334	1.50862	0.519674	3.40885	0.637222	-0.0152182	0.0368653	0.700918
CCDC41	Inverse variance weighted	10	-0.0990872	0.125133	0.905664	0.708683	1.1574	0.428444	10.1235	0.340578	0.00816461	0.0343585	0.818141
CCDC47	Inverse variance weighted	5	0.101349	0.192145	1.10666	0.759379	1.61277	0.597871	3.42167	0.489888	0.0768427	0.0630195	0.309837
CCDC50	Inverse variance weighted	24	-0.0490228	0.0678093	0.952159	0.833661	1.0875	0.46971	19.1366	0.693267	0.0205251	0.018804	0.28685
CCDC53	Inverse variance weighted	24	-0.00820055	0.0490585	0.991833	0.900905	1.09194	0.867245	34.674	0.0560206	-0.00487297	0.0194085	0.804087
CCDC57	Inverse variance weighted	24	-0.16351	0.0611001	0.849158	0.753319	0.957189	0.00744832	29.2877	0.17096	0.0320503	0.0265026	0.239374
CCDC6	Inverse variance weighted	7	0.0137836	0.112512	1.01388	0.813231	1.26403	0.902497	3.36651	0.761637	-0.0297737	0.0437232	0.526149
CCDC61	Inverse variance weighted	4	0.254036	0.405185	1.28922	0.582674	2.85251	0.530683	12.8201	0.00504234	0.105969	0.112352	0.445146
CCDC62	Inverse variance weighted	2	0.197504	0.286478	1.21836	0.694896	2.13614	0.490558	NA	NA	NA	NA	NA
CCDC64	Inverse variance weighted	2	0.369961	0.321555	1.44768	0.770831	2.71885	0.249922	NA	NA	NA	NA	NA
CCDC64B	Inverse variance weighted	27	-0.0182193	0.0455112	0.981946	0.898147	1.07356	0.688916	21.8075	0.699183	0.0165657	0.0185796	0.381104
CCDC66	Inverse variance weighted	12	0.0525969	0.0770874	1.054	0.906201	1.22592	0.495048	24.0417	0.0125584	0.0547477	0.0367049	0.16667
CCDC69	Inverse variance weighted	10	-0.0850003	0.140982	0.918512	0.696753	1.21085	0.546564	9.47759	0.394406	0.000553136	0.0311194	0.986254
CCDC7	Inverse variance weighted	8	-0.227457	0.165062	0.796557	0.576386	1.10083	0.168201	3.85934	0.795829	0.0271575	0.0441139	0.560754
CCDC71	Inverse variance weighted	6	0.00603268	0.146165	1.00605	0.755443	1.3398	0.967078	4.44689	0.487021	0.0440065	0.0445586	0.379254
CCDC74A	Inverse variance weighted	7	-0.0148117	0.0693504	0.985297	0.860073	1.12875	0.830877	12.8071	0.0462042	0.010133	0.0622102	0.876988
CCDC77	Inverse variance weighted	42	0.0102301	0.035565	1.01028	0.942257	1.08322	0.773619	42.5488	0.404234	0.0113171	0.013462	0.405527
CCDC81	Inverse variance weighted	3	-0.140931	0.326972	0.868549	0.457584	1.64861	0.666455	1.59132	0.451283	-0.131515	0.107743	0.436952
CCDC82	Inverse variance weighted	21	0.057367	0.0710248	1.05904	0.921418	1.21723	0.419261	10.005	0.968081	-0.00591918	0.0165027	0.72379
CCDC84	Inverse variance weighted	9	0.0566463	0.0731312	1.05828	0.91696	1.22138	0.438585	3.94146	0.862366	0.0292456	0.0278141	0.327982
CCDC85A	Inverse variance weighted	10	0.0202812	0.108613	1.02049	0.824812	1.26259	0.851873	8.56761	0.478105	-0.00863457	0.0362255	0.817597
CCDC85B	Inverse variance weighted	3	0.0877317	0.413575	1.0917	0.485354	2.45552	0.832006	1.73713	0.419554	0.0918161	0.080064	0.456539
CCDC85C	Inverse variance weighted	11	-0.0708979	0.0942821	0.931557	0.774381	1.12063	0.452066	6.57434	0.764926	-0.0126768	0.0283564	0.665401
CCDC86	Inverse variance weighted	6	-0.0241906	0.175724	0.9761	0.691696	1.37744	0.890507	2.95331	0.707184	-0.0108873	0.0528101	0.846735
CCDC88A	Inverse variance weighted	12	-0.0808276	0.151712	0.922353	0.685105	1.24176	0.594193	13.3974	0.268146	-0.058222	0.0288446	0.0711614
CCDC88B	Inverse variance weighted	47	-4.73155e-05	0.0408389	0.999953	0.923032	1.08328	0.999076	43.5394	0.575881	-0.0123509	0.0149043	0.411658
CCDC88C	Inverse variance weighted	7	-0.177875	0.194434	0.837047	0.5718	1.22534	0.360279	4.48485	0.611361	0.0867027	0.0887036	0.37324
CCDC9	Inverse variance weighted	6	0.367231	0.175154	1.44373	1.02422	2.03507	0.036027	2.42243	0.788129	0.0310887	0.0481401	0.553592
CCDC90B	Inverse variance weighted	2	0.0728866	0.534924	1.07561	0.37698	3.06896	0.891619	NA	NA	NA	NA	NA
CCDC91	Inverse variance weighted	4	0.00420941	0.278801	1.00422	0.581445	1.73439	0.987954	0.358263	0.948723	0.000147656	0.048096	0.997829
CCDC92	Inverse variance weighted	21	-0.0642301	0.0887273	0.937789	0.788096	1.11592	0.469124	9.7237	0.97291	-0.0057744	0.0228585	0.803278
CCDC94	Inverse variance weighted	9	0.0439386	0.129535	1.04492	0.810624	1.34693	0.734458	13.1088	0.108162	-0.0017869	0.0411058	0.96654
CCDC97	Inverse variance weighted	2	-0.424529	0.391611	0.654078	0.303587	1.40921	0.278339	NA	NA	NA	NA	NA
CCHCR1	Inverse variance weighted	18	0.0590758	0.0631333	1.06086	0.937381	1.20059	0.349412	23.6937	0.128	-0.00543379	0.0234003	0.819319
[truncated: 11,159 more rows]

## Sheet: Table S2
Table S2.Full results of pQTL-based Mendelian randomization analysis for PCOS
exposure	or	or_lci95	or_uci95	pvalue	egger_intercept	egger_intercept_se	egger_intercept_pval
A1BG	0.678195	0.470759	0.977036	0.0370946	-0.0407362	0.0358043	0.292666
ABHD14B	0.8172	0.668533	0.998928	0.0487846	-0.00154189	0.0252568	0.952524
ACP6	0.942843	0.901545	0.986032	0.0100079	0.00879404	0.01104	0.427777
ADD1	1.40265	1.01883	1.93106	0.0380468	0.00460611	0.0332037	0.894208
ADGRE5	1.37053	1.09137	1.7211	0.00668046	0.0377056	0.0230731	0.119589
ADM	1.43415	1.07899	1.90622	0.0130047	-0.018923	0.0325675	0.571151
AHSG	0.932772	0.878762	0.990102	0.0222033	-0.001266	0.0102527	0.902071
AIF1L	1.17958	1.0324	1.34773	0.0151395	0.0213633	0.0166448	0.21023
AMY2A	1.1381	1.05803	1.22424	0.000509745	0.0238332	0.0120656	0.0529188
ANPEP	1.12416	1.02887	1.22828	0.00960198	0.0265285	0.0192109	0.174975
AOC1	0.834845	0.701234	0.993914	0.0424991	0.00956894	0.0202051	0.643646
APOD	1.20561	1.01196	1.43631	0.0363458	-0.0074457	0.0179775	0.683645
APOF	1.41831	1.06334	1.89177	0.0174116	-0.0215006	0.0276725	0.459533
ASAH2	0.913666	0.858562	0.972307	0.004443	-0.00451409	0.0112753	0.690101
ATRAID	0.817589	0.703802	0.949772	0.00843892	-0.0177441	0.0240889	0.4669
BCAM	0.726979	0.602222	0.87758	0.00090185	0.00379357	0.0172056	0.827359
BCAN	0.655651	0.493882	0.870406	0.00349867	-0.0200582	0.029247	0.502071
BMP10	1.22931	1.04229	1.44989	0.014212	0.0160483	0.0188106	0.415701
BPIFB2	1.11726	1.00495	1.24212	0.0402365	0.00470854	0.0181451	0.796465
BTC	1.12253	1.02099	1.23415	0.0168692	-0.0160349	0.0152177	0.298851
C1QTNF9	0.938195	0.887317	0.99199	0.0249141	-0.0090633	0.00933738	0.334325
C7orf50	0.897704	0.811354	0.993244	0.0364948	-0.0269543	0.0157541	0.0977704
CA13	1.20283	1.02859	1.40659	0.0207171	0.0298988	0.020571	0.168148
CA2	0.576683	0.375862	0.884803	0.0117227	0.101955	0.0704942	0.221635
CA4	0.845749	0.734412	0.973964	0.0200016	-0.0224939	0.0240464	0.365419
CAMKK1	0.699256	0.588991	0.830165	4.39102e-05	-0.0289635	0.0398273	0.487819
CCL17	1.23785	1.0288	1.48938	0.0237699	-0.00901595	0.0284454	0.756723
CCL25	1.08708	1.02418	1.15384	0.00603587	-0.00229249	0.0106987	0.830962
CCL27	0.74943	0.599819	0.936359	0.0111244	-0.0354902	0.0307512	0.272915
CD163	1.46197	1.03015	2.07482	0.0334796	0.00323308	0.0350646	0.930117
CD177	0.948001	0.908893	0.988791	0.0129755	0.00055803	0.0112085	0.960406
CD207	0.877354	0.800242	0.961897	0.00530882	-0.0108814	0.0115071	0.348263
CD33	0.945295	0.907756	0.984386	0.00650492	-0.00426504	0.00858713	0.620683
CD55	0.81692	0.740892	0.90075	4.96484e-05	-0.0120632	0.0133199	0.370983
CD6	0.93116	0.873853	0.992225	0.0277474	0.0193906	0.0119609	0.108823
CD80	0.887035	0.795721	0.988828	0.0305645	-0.0287256	0.0155745	0.0738533
CD83	1.23912	1.00746	1.52406	0.0423167	-0.0390392	0.0238069	0.119413
CD8A	1.31916	1.06328	1.63661	0.0118104	0.0404359	0.0276367	0.158973
CDH15	1.14643	1.04849	1.25352	0.00270735	0.0102528	0.0118443	0.391388
CDH17	1.13504	1.00961	1.27606	0.0340055	0.0244298	0.0155138	0.122174
CEACAM5	0.83712	0.734346	0.954277	0.00780718	0.00265569	0.0176501	0.882073
CES2	0.617432	0.405895	0.939212	0.0242571	0.0359852	0.0892272	0.725758
CHGB	1.09382	1.00523	1.19021	0.0374225	0.00222236	0.0175578	0.899829
CHIT1	0.892189	0.84569	0.941245	2.94978e-05	0.0068172	0.00959825	0.479638
CHMP1A	1.75783	1.21346	2.54639	0.00285192	0.0287062	0.0431988	0.525049
CILP	1.21668	1.01945	1.45207	0.0297462	0.0266064	0.0377945	0.493866
CLEC4D	1.15661	1.05843	1.26389	0.00130582	-0.00830652	0.0168824	0.626063
CNTN5	0.923997	0.866642	0.985148	0.0156212	-0.00828332	0.00866572	0.341272
COCH	0.879462	0.786086	0.983929	0.0249028	-0.00772236	0.0207299	0.712213
COMT	0.893401	0.821111	0.972055	0.00883488	-0.00578738	0.0172898	0.739386
CREG1	0.626226	0.496489	0.789865	7.76303e-05	-0.0375031	0.0317243	0.267434
CRELD1	1.08048	1.02544	1.13849	0.00371249	0.009286	0.0107502	0.389512
CRTAC1	1.07846	1.00479	1.15753	0.0364127	0.0132251	0.0104775	0.210529
CRYZL1	2.39913	1.62395	3.54432	1.10651e-05	-0.000170221	0.0336558	0.996106
CSF3R	1.12171	1.01402	1.24085	0.0257252	-0.00572054	0.0200089	0.77983
CST3	1.17806	1.02395	1.35538	0.0219741	-0.00807765	0.0184291	0.664926
CST5	0.926239	0.878875	0.976156	0.00422125	0.00701761	0.00976855	0.474227
CST7	0.935613	0.884471	0.989712	0.0203105	0.00249962	0.0111114	0.822538
CTSS	1.10755	1.02486	1.19691	0.00987225	0.0174687	0.016204	0.285554
CTSV	1.21375	1.04474	1.41009	0.0113365	0.0175075	0.0217597	0.428959
CXCL10	1.99283	1.14492	3.46871	0.0147446	0.0529536	0.0491039	0.359838
CYTL1	0.917499	0.853448	0.986357	0.0196981	0.00807571	0.0103446	0.440562
DBH	0.952375	0.914963	0.991317	0.0170098	0.00818814	0.00927202	0.379615
DCXR	2.47209	1.13753	5.37236	0.02229	-0.0457782	0.0944663	0.712725
DDC	0.833725	0.741696	0.937173	0.00230881	0.00563947	0.0143286	0.696769
DLK1	0.871768	0.803801	0.945482	0.000920861	-0.0100598	0.0136346	0.464148
DNAJA4	1.85052	1.30398	2.62613	0.000568603	0.0265662	0.0324145	0.431556
DNER	0.880281	0.786676	0.985024	0.026212	-0.0250449	0.0137751	0.0751607
DPEP1	0.890923	0.855775	0.927514	1.8635e-08	0.00880103	0.0090181	0.331184
DPEP2	1.30258	1.01134	1.67768	0.0406237	-0.00331938	0.0285738	0.90944
DPP7	1.08076	1.00789	1.15889	0.0291965	0.00584112	0.0109084	0.594212
DSG3	1.1952	1.01595	1.40608	0.0314859	0.0073066	0.0184407	0.695056
ECI2	1.30148	1.06641	1.58838	0.00952583	-0.00781896	0.0339967	0.820692
EDIL3	0.347936	0.175613	0.689353	0.00247502	-0.0746679	0.0619703	0.441009
EFCAB2	0.850198	0.750907	0.962619	0.0104287	-0.00312038	0.024422	0.899107
ENDOU	1.16236	1.0248	1.31837	0.0192178	-0.00415716	0.0175904	0.814731
ENPP5	1.06103	1.013	1.11133	0.0121934	-0.00190578	0.00830219	0.8189
ENPP7	0.94036	0.89434	0.988748	0.0163043	0.00749596	0.0148564	0.616276
ENTR1	1.27506	1.0141	1.60318	0.0375415	0.0268424	0.0312415	0.402924
EPHX2	0.611518	0.427381	0.87499	0.00713269	0.0173095	0.0371712	0.657875
EPPK1	1.08737	1.0179	1.16158	0.0128868	-0.0101685	0.0113458	0.37242
F12	1.05348	1.01371	1.09482	0.00796422	0.0033382	0.00754459	0.658951
FABP6	0.635967	0.446121	0.906601	0.012348	-0.0369591	0.0536466	0.516604
FBLN2	1.17245	1.00297	1.37057	0.0458044	0.0170931	0.0182177	0.356129
FCRLB	1.08084	1.01973	1.14561	0.0088438	0.00110138	0.0125545	0.930376
FGA	1.52829	1.10362	2.11638	0.0106621	0.0448317	0.0298248	0.163702
FGFBP1	0.751914	0.56919	0.993296	0.0447116	-0.027648	0.0376926	0.477332
FGFR2	0.717743	0.523023	0.984957	0.0399883	0.0637291	0.0340901	0.0910932
FGFR4	1.05294	1.00539	1.10273	0.0286662	0.00832972	0.00978366	0.396671
FN1	0.787581	0.704207	0.880828	2.88043e-05	0.00617639	0.014877	0.680556
FOLR3	0.954163	0.911415	0.998916	0.0448164	0.0118881	0.00834149	0.158964
FRZB	1.11432	1.02167	1.21537	0.0145201	0.00189888	0.0131658	0.885978
FSHB	0.254654	0.16305	0.397722	1.81876e-09	-0.0326654	0.0341134	0.382265
FXYD5	1.20538	1.03425	1.40483	0.0167978	0.00772982	0.0291294	0.794892
GASK1A	0.919706	0.864291	0.978674	0.0082932	-0.0246521	0.0135377	0.0723011
GFRA3	2.41307	1.38905	4.19198	0.00177039	-0.0302692	0.090575	0.760235
GM2A	1.10024	1.03889	1.16522	0.00110185	0.0166886	0.0109717	0.132626
GNLY	1.07391	1.0013	1.15178	0.0458917	0.0217668	0.0132202	0.105696
GPA33	0.790357	0.633579	0.985929	0.0370128	-0.00676305	0.0231822	0.778945
GSTP1	1.20892	1.00365	1.45615	0.0456707	-0.00723083	0.0261013	0.786894
GZMB	1.17543	1.02403	1.34922	0.0215913	0.0143288	0.0174508	0.419351
HRC	0.577808	0.388901	0.858474	0.00661858	-0.0735475	0.0710025	0.340207
HRG	0.871363	0.799446	0.94975	0.00172964	-0.0136137	0.0148883	0.365499
HSPB1	1.15922	1.05877	1.2692	0.00139913	0.00175299	0.0132773	0.895462
HYAL1	1.17975	1.00861	1.37992	0.0387148	-0.0109893	0.020868	0.608921
ICAM2	0.478745	0.273566	0.83781	0.00988603	-0.0852891	0.0588043	0.220562
IDO1	1.21703	1.03476	1.4314	0.0176524	0.0206511	0.0227114	0.374029
IDO1	1.23053	1.02786	1.47317	0.023869	0.0189753	0.0251743	0.459364
IDO1	1.1702	1.00838	1.358	0.0384654	0.00433256	0.0231595	0.853317
IFI30	1.13193	1.00822	1.27081	0.0358437	-0.00632864	0.0164411	0.703099
IFNAR1	1.10496	1.00356	1.21662	0.0421245	-0.0348504	0.0188204	0.0727642
IGFBP3	1.12776	1.02655	1.23895	0.0122065	0.0160721	0.0140465	0.256437
IGFBP7	1.24002	1.11974	1.37322	3.58755e-05	0.0303536	0.0151503	0.051604
IL15RA	0.86811	0.773291	0.974556	0.0165416	0.0150794	0.0150753	0.323856
IL17F	1.47977	1.12026	1.95465	0.00578586	0.0213486	0.0383854	0.595421
IL18R1	0.943053	0.894831	0.993874	0.0285637	-0.00781005	0.00990867	0.43277
IL20RB	2.49425	1.23722	5.02844	0.0106162	0.0468078	0.0588386	0.572186
IL6R	0.946208	0.903225	0.991236	0.0197487	-0.00310022	0.0117832	0.793086
ISLR2	0.794329	0.671788	0.939221	0.00707065	-0.0257304	0.0200122	0.209868
ITGAV	0.720796	0.553745	0.938242	0.014937	0.000554659	0.041396	0.98955
ITGB5	0.421721	0.236635	0.751573	0.00340357	0.0710387	0.0705345	0.419908
ITIH4	1.3229	1.14728	1.52539	0.00011774	-0.0159602	0.0218186	0.47102
KLK13	0.876796	0.794522	0.967589	0.00891238	0.00738101	0.0124249	0.55679
KLK4	0.875836	0.79454	0.96545	0.00764341	-0.021916	0.0156047	0.168308
KLK8	1.19169	1.04888	1.35395	0.00708592	-0.00273575	0.0152906	0.859504
KLKB1	1.1466	1.02446	1.2833	0.0172876	0.0213825	0.0149514	0.160076
KLRD1	0.877976	0.793304	0.971684	0.0118979	0.00575897	0.0161222	0.722862
KLRK1	0.869897	0.790677	0.957054	0.00422251	0.0157519	0.0124579	0.213055
LCP1	0.884881	0.821828	0.952772	0.00118378	-0.00554116	0.0118797	0.643313
LEFTY2	0.934104	0.885571	0.985296	0.0122741	-0.00130335	0.0100318	0.896946
LY75	0.922059	0.888555	0.956826	1.73041e-05	-0.00370896	0.010528	0.725285
LYVE1	1.44453	1.11075	1.87859	0.00607747	0.0344482	0.0270476	0.249913
LZTFL1	1.5423	1.11499	2.13337	0.00885567	0.0125842	0.0291194	0.707757
M6PR	1.43131	1.07443	1.90674	0.0142617	0.0538988	0.0397384	0.246498
MAMDC4	1.46443	1.19052	1.80135	0.000305404	0.0203412	0.021251	0.361041
MANSC4	1.07679	1.0162	1.14099	0.0122881	0.0155104	0.0112104	0.170824
MARCO	0.794586	0.663271	0.951899	0.0125997	-0.000488618	0.0234202	0.983552
MCAM	0.650931	0.427656	0.990776	0.0451521	0.0741215	0.0592895	0.337685
MGLL	0.537113	0.312999	0.921698	0.0240739	0.0132445	0.0544156	0.848005
MMP12	0.908245	0.848505	0.972192	0.00556386	-0.00190806	0.00958575	0.842791
MSLN	1.09005	1.01549	1.17008	0.0170691	0.000662365	0.0121117	0.956557
MTHFD2	1.9383	1.11985	3.35491	0.0180589	0.0524262	0.0460119	0.337274
MXRA8	1.85718	1.00251	3.44048	0.0490717	-0.0380833	0.105183	0.751978
NADK	0.695088	0.573811	0.841997	0.000200796	0.0288877	0.0403653	0.482906
NBL1	1.86924	1.09386	3.19424	0.0221274	0.0477682	0.0968634	0.670735
NCAN	1.46879	1.11405	1.93648	0.00641545	-0.036527	0.03167	0.275584
NCS1	2.62234	1.67759	4.09912	2.33685e-05	-0.0198409	0.0547209	0.740954
NINJ1	1.27007	1.08304	1.4894	0.00326557	0.0414079	0.0268368	0.142389
NMI	0.876003	0.801713	0.957177	0.00341158	0.00662564	0.0134453	0.624026
NOTCH3	0.441105	0.201286	0.966655	0.040882	-0.08346	0.0469313	0.173406
NPHS1	1.11058	1.02242	1.20635	0.0129418	0.010554	0.0122732	0.393637
NPTX1	0.894681	0.834944	0.958691	0.0015964	0.00983004	0.0106732	0.360679
NPTX2	1.20837	1.04867	1.39238	0.00886588	-0.00756971	0.0169729	0.65861
NRCAM	0.847378	0.764197	0.939613	0.00168038	-0.0186257	0.0188867	0.330125
NSFL1C	1.79415	1.06193	3.03125	0.0289209	-0.042898	0.0743732	0.604513
NT5C3A	1.59827	1.06234	2.40455	0.0244356	0.0669401	0.0534051	0.298838
NUB1	1.47323	1.111	1.95356	0.00712111	0.0312613	0.027184	0.293912
OPLAH	0.770062	0.614183	0.965504	0.0235614	0.00828297	0.0354385	0.819136
OSMR	0.926578	0.860873	0.997299	0.0421451	-0.00969156	0.0129904	0.458455
PAEP	1.07609	1.00982	1.14671	0.0237346	-0.0098035	0.0110846	0.379884
PAM	1.07147	1.00676	1.14034	0.0298511	0.00915729	0.0106643	0.394109
PAMR1	1.16042	1.05472	1.27672	0.00226241	-0.0158377	0.0122498	0.201358
PCDH9	0.886726	0.805088	0.976642	0.0147024	-0.00648635	0.0171658	0.707269
PDCD1LG2	1.12051	1.05396	1.19126	0.000270164	-0.00415637	0.0114323	0.717087
PDCD6	0.943414	0.89782	0.991323	0.0211757	0.00730027	0.0114819	0.527242
PEPD	0.858708	0.754625	0.977146	0.020849	0.00629115	0.0198894	0.754296
PER3	1.17705	1.06465	1.30132	0.00145509	0.0324529	0.017168	0.0647612
PFKFB2	1.39597	1.10698	1.76041	0.00482067	0.023903	0.0255925	0.365104
PGD	0.830611	0.702043	0.982725	0.0305337	-0.0260469	0.0295708	0.443267
PI3	1.32133	1.13821	1.53392	0.000251486	0.00110224	0.0191865	0.954899
PLA2G2A	0.890247	0.828768	0.956286	0.00145113	0.00993548	0.0127003	0.437393
PLAUR	0.64862	0.463259	0.908149	0.0116993	-0.0373182	0.0319469	0.280995
PLG	1.15623	1.06674	1.25322	0.000412436	0.00342547	0.00959567	0.72207
PLTP	1.13278	1.02841	1.24774	0.011469	-0.013069	0.013449	0.33661
PLXDC1	0.895022	0.813737	0.984427	0.0224235	-0.00759383	0.0120728	0.533551
PON1	0.959616	0.922866	0.997829	0.0385395	-0.0162404	0.00997956	0.106601
PON2	1.07034	1.02108	1.12198	0.00468922	-0.00657526	0.00937064	0.48452
PON3	1.14632	1.01892	1.28965	0.0230955	0.00480512	0.0190861	0.80262
PPP1R14A	1.34724	1.02148	1.77689	0.0348156	0.0568732	0.0354432	0.128129
PROCR	1.16359	1.01579	1.3329	0.0288071	0.0282506	0.0205627	0.196828
PROK1	1.12838	1.01179	1.25841	0.0299524	0.000866062	0.0162642	0.957805
PRTFDC1	1.39014	1.11484	1.73342	0.00343927	0.0476478	0.0259783	0.103976
PSCA	1.03777	1.00036	1.07659	0.047815	-0.00920426	0.00900677	0.30912
PSMD9	1.40242	1.07392	1.83141	0.0130013	0.0413902	0.039413	0.341726
PSMG4	1.70001	1.10626	2.61244	0.0154908	-0.0866021	0.0602311	0.246048
PTX3	1.92042	1.05566	3.49358	0.032564	-0.0354829	0.0984264	0.779729
PVR	0.8724	0.818782	0.92953	2.46396e-05	-0.0110318	0.0107031	0.306277
PXN	1.13566	1.06253	1.21382	0.00017973	-0.00275423	0.0111017	0.804771
PYY	1.25214	1.04219	1.50437	0.0163354	-0.00573304	0.0311235	0.856168
RARRES1	0.906758	0.832707	0.987394	0.0243307	-0.00344375	0.0154926	0.824998
RBP7	1.35587	1.17169	1.56901	4.36883e-05	0.0201847	0.0182344	0.282129
RET	0.869974	0.792883	0.95456	0.00325742	0.0203786	0.0200392	0.31597
RGMB	1.222	1.00384	1.48757	0.0456902	0.0172356	0.023615	0.472541
RNF149	1.27821	1.09609	1.4906	0.00174905	0.0133057	0.0220484	0.552656
ROBO2	0.554412	0.402596	0.763475	0.000302533	-0.0646141	0.0368924	0.107669
RSPO3	1.59955	1.16237	2.20117	0.00393023	0.0936427	0.0421154	0.0615603
RTN4R	1.10538	1.00153	1.22	0.046552	-0.0100474	0.0150306	0.507108
SAA4	0.852552	0.765617	0.949359	0.00364841	-0.00486832	0.0168242	0.774293
SBSN	1.17326	1.0839	1.26999	7.71224e-05	0.0101266	0.0127232	0.429999
SCARB2	0.855224	0.746875	0.979292	0.0236503	-0.0206197	0.0241866	0.401422
SCGB3A2	1.3832	1.01785	1.87968	0.0381635	-0.0372242	0.043617	0.411618
SELPLG	1.08674	1.00555	1.1745	0.0357584	0.0198822	0.0154409	0.218752
SERPINA3	0.852504	0.762783	0.952779	0.00491471	0.0166534	0.0138824	0.237531
SERPINB8	0.912612	0.842158	0.988959	0.0256914	0.0084181	0.017317	0.629192
SERPINH1	0.639192	0.450132	0.90766	0.0123658	-0.0195738	0.0404795	0.640254
SFTPD	1.1144	1.05742	1.17444	5.22877e-05	0.0197205	0.0118727	0.10058
SH3BP1	0.832752	0.709649	0.97721	0.0249314	-0.0262855	0.0219713	0.24489
SLAMF7	0.891055	0.834319	0.95165	0.000589496	-0.00154844	0.0112593	0.891108
SMAD3	1.20635	1.01358	1.43578	0.0347034	-0.0177635	0.0239008	0.472925
SMPDL3A	1.08932	1.01285	1.17157	0.021227	0.00212657	0.0111678	0.849516
SNAP29	2.47974	1.24206	4.95076	0.010038	0.105809	0.0743536	0.389959
SORD	0.604452	0.465887	0.784229	0.000150899	0.0424518	0.0449242	0.381157
SPRY2	1.68579	1.05818	2.68566	0.027949	-0.0418272	0.115028	0.734542
SPTLC1	1.43977	1.02387	2.0246	0.0361132	0.0266387	0.0419531	0.543182
STAB2	0.911329	0.831072	0.999336	0.0483687	0.0170957	0.0113618	0.139397
STAT2	1.59657	1.17704	2.16563	0.00262965	0.0586386	0.0307791	0.152855
SULT2A1	1.23115	1.02021	1.48571	0.0301085	-0.0219865	0.025066	0.399161
TBC1D23	1.53898	1.15631	2.04828	0.00311933	0.0294163	0.0380031	0.456812
TBCA	0.589526	0.409536	0.848621	0.00446725	0.0474367	0.112559	0.701809
TCL1A	1.16614	1.02649	1.32479	0.0181877	0.0239447	0.0138001	0.0989138
TEX101	1.35736	1.07552	1.71306	0.0100783	0.0227627	0.0196256	0.264239
TF	1.23196	1.08708	1.39615	0.00108304	0.00374018	0.0167564	0.824837
TFPI	1.24887	1.0695	1.45832	0.00496463	0.0053864	0.0239904	0.823619
TGFBI	0.895771	0.828821	0.968129	0.00548207	-0.0184949	0.0144934	0.206843
THBS2	0.908937	0.829839	0.995575	0.0398327	-0.010763	0.014152	0.451757
THOP1	0.677227	0.572933	0.800507	4.92943e-06	0.00233775	0.0238778	0.923224
TIE1	0.675802	0.520591	0.877287	0.0032462	-0.02016	0.0453911	0.666398
TLR4	1.62221	1.21464	2.16655	0.00104852	0.0211089	0.0257335	0.443411
TNFRSF10A	0.922544	0.853749	0.996882	0.0414509	-0.00532772	0.0119396	0.657187
TNFRSF10B	0.862875	0.764031	0.974507	0.0174999	0.0158998	0.0144594	0.279967
TNFRSF6B	0.888139	0.808003	0.976222	0.0139404	-0.00763222	0.0145107	0.60133
TNFRSF9	1.31247	1.04541	1.64775	0.0191478	0.0352874	0.0303869	0.275405
TNFSF10	1.52195	1.20653	1.91982	0.000393393	0.0215445	0.0232235	0.384434
TP53I3	0.891619	0.810994	0.980259	0.0176767	-0.00966976	0.0129888	0.460551
TPSD1	1.10161	1.00982	1.20174	0.0292489	0.00196447	0.0112284	0.861997
TSPAN8	1.1519	1.05649	1.25593	0.00134798	0.00614636	0.0162381	0.706589
VIT	0.912182	0.852717	0.975794	0.00752981	-0.00700004	0.00966694	0.471104
VMO1	1.08698	1.03693	1.13946	0.000525305	-0.00110157	0.00896549	0.902483
VSIG2	0.667736	0.529723	0.841708	0.000629169	0.0392876	0.0302999	0.227017
VSIR	1.1592	1.01406	1.32511	0.0304207	0.024334	0.0168547	0.15917
WFIKKN2	1.09303	1.01709	1.17463	0.0154619	0.000944108	0.0121241	0.938163
WWP2	0.694266	0.500882	0.962312	0.0284788	0.000950464	0.0326383	0.977895
ZFYVE19	1.23732	1.10071	1.39089	0.000360355	0.0155836	0.0164132	0.34809
ZP3	0.966417	0.934087	0.999866	0.0491022	0.00475075	0.00941169	0.61472

## Sheet: TableS3
TableS3. Overlapping genes identified by both eQTL- and pQTL-based Mendelian randomization analyses
significant_eqtl	significant_pqtl	venn
A4GALT	A1BG	ACP6
ABCA1	ABHD14B	ATRAID
ABCA2	ACP6	CA2
ABCC5	ADD1	CD33
ABCC6	ADGRE5	CD55
ABHD12B	ADM	CD83
ABHD5	AHSG	CD8A
ABO	AIF1L	CHIT1
ABT1	AMY2A	CHMP1A
AC004231.2	ANPEP	CILP
AC004791.2	AOC1	CLEC4D
AC004893.10	APOD	CREG1
AC004893.11	APOF	CRELD1
AC005041.17	ASAH2	CST3
AC005306.3	ATRAID	DLK1
AC006026.13	BCAM	DPEP2
AC006369.2	BCAN	ECI2
AC006538.1	BMP10	EFCAB2
AC006946.15	BPIFB2	ENDOU
AC007292.6	BTC	FGFR2
AC007395.4	C1QTNF9	FGFR4
AC007401.2	C7orf50	FN1
AC008537.1	CA13	FOLR3
AC010883.5	CA2	GNLY
AC011893.3	CA4	GPA33
AC013400.2	CAMKK1	IDO1
AC016773.1	CCL17	IL6R
AC017099.3	CCL25	ITIH4
AC018633.4	CCL27	KLRD1
AC018890.6	CD163	KLRK1
AC020910.2	CD177	LY75
AC021860.1	CD207	LZTFL1
AC022431.2	CD33	M6PR
AC022498.1	CD55	MARCO
AC046143.7	CD6	MTHFD2
AC068039.4	CD80	NBL1
AC068282.3	CD83	NMI
AC068491.1	CD8A	NSFL1C
AC069513.3	CDH15	PAM
AC073346.2	CDH17	PDCD1LG2
AC079031.1	CEACAM5	PER3
AC079325.5	CES2	PI3
AC087380.14	CHGB	PON2
AC091729.9	CHIT1	PPP1R14A
AC091814.2	CHMP1A	PSMD9
AC091814.3	CILP	RBP7
AC093668.3	CLEC4D	RNF149
AC093690.1	CNTN5	SERPINB8
AC099552.2	COCH	SFTPD
AC108463.2	COMT	SLAMF7
AC108488.3	CREG1	SNAP29
AC113189.5	CRELD1	SORD
AC127904.2	CRTAC1	SPRY2
AC131056.3	CRYZL1	STAT2
AC137932.5	CSF3R	TBCA
AC159540.1	CST3	TEX101
ACACB	CST5	THOP1
ACADVL	CST7	TPSD1
ACAT2	CTSS	VMO1
ACOT13	CTSV	ZFYVE19
ACOT4	CXCL10
ACOT7	CYTL1
ACP5	DBH
ACP6	DCXR
ACTA2	DDC
ACTR2	DLK1
ACVR2A	DNAJA4
ADAM10	DNER
ADAM23	DPEP1
ADAMTS6	DPEP2
ADAMTSL2	DPP7
ADARB1	DSG3
ADAT2	ECI2
ADPRH	EDIL3
AEBP1	EFCAB2
AF131215.2	ENDOU
AF216667.1	ENPP5
AGA	ENPP7
AGAP9	ENTR1
AGPAT1	EPHX2
AHSA2	EPPK1
AHSP	F12
AIFM2	FABP6
AIM1	FBLN2
AIP	FCRLB
AKAP10	FGA
AKAP12	FGFBP1
AKT1	FGFR2
AL353898.2	FGFR4
AL359314.1	FN1
AL513344.1	FOLR3
ALDH18A1	FRZB
ALDH3A2	FSHB
ALDH3B1	FXYD5
ALDH8A1	GASK1A
ALG6	GFRA3
ALG8	GM2A
AMDHD1	GNLY
AMICA1	GPA33
AMIGO2	GSTP1
AMPD3	GZMB
ANAPC15	HRC
ANAPC7	HRG
ANK3	HSPB1
ANKDD1A	HYAL1
ANKK1	ICAM2
ANKRD10	IDO1
ANKRD28	IDO1
ANKRD36	IDO1
ANKRD36B	IFI30
ANKRD37	IFNAR1
ANKRD42	IGFBP3
ANKRD50	IGFBP7
ANKRD55	IL15RA
ANO2	IL17F
ANTXR2	IL18R1
ANXA1	IL20RB
AP000355.2	IL6R
AP000783.1	ISLR2
AP001189.4	ITGAV
AP1B1	ITGB5
AP1S3	ITIH4
AP3S1	KLK13
AP3S2	KLK4
AP5B1	KLK8
APOA1BP	KLKB1
APP	KLRD1
APPL2	KLRK1
ARAP1	LCP1
ARAP3	LEFTY2
ARCN1	LY75
ARF3	LYVE1
ARFGAP2	LZTFL1
ARFIP1	M6PR
ARHGAP1	MAMDC4
ARHGAP12	MANSC4
ARHGAP19	MARCO
ARHGAP25	MCAM
ARHGAP27	MGLL
ARHGEF11	MMP12
ARHGEF17	MSLN
ARHGEF3	MTHFD2
ARID5A	MXRA8
ARL11	NADK
ARL6IP1	NBL1
ARMC3	NCAN
ARSA	NCS1
ARVCF	NINJ1
ASAP3	NMI
ASCC1	NOTCH3
ASCC2	NPHS1
ASCC3	NPTX1
ASLP1	NPTX2
ATF1	NRCAM
ATF6	NSFL1C
ATG12	NT5C3A
ATG16L1	NUB1
ATOH8	OPLAH
ATP10D	OSMR
ATP13A1	PAEP
ATP1B2	PAM
ATP1B3	PAMR1
ATP5D	PCDH9
ATP5G1	PDCD1LG2
ATP6V1E2	PDCD6
ATP8B2	PEPD
ATP8B4	PER3
ATPAF1	PFKFB2
ATPAF2	PGD
ATRAID	PI3
ATXN3	PLA2G2A
AUP1	PLAUR
AUTS2	PLG
AVPI1	PLTP
AXIN2	PLXDC1
AZI1	PON1
AZI2	PON2
B3GALNT1	PON3
B3GALNT2	PPP1R14A
B3GNT1	PROCR
B3GNT2	PROK1
B3GNT8	PRTFDC1
B4GALT3	PSCA
B4GALT5	PSMD9
B4GALT6	PSMG4
BACE1	PTX3
BACH1	PVR
BAG5	PXN
BANF1	PYY
BCO2	RARRES1
BEGAIN	RBP7
BEND7	RET
BFSP1	RGMB
BHLHE40	RNF149
BICC1	ROBO2
BIVM	RSPO3
BLK	RTN4R
BLM	SAA4
BLOC1S5	SBSN
BLVRA	SCARB2
BMP4	SCGB3A2
BMP6	SELPLG
BOD1	SERPINA3
BRD1	SERPINB8
BRPF3	SERPINH1
BRSK1	SFTPD
BTBD10	SH3BP1
BTBD7	SLAMF7
BTN2A1	SMAD3
BUD13	SMPDL3A
BX322557.10	SNAP29
C10orf105	SORD
C10orf11	SPRY2
C10orf32	SPTLC1
C10orf88	STAB2
C11orf75	STAT2
C12orf73	SULT2A1
C12orf76	TBC1D23
C16orf55	TBCA
C19orf35	TCL1A
C19orf52	TEX101
C1orf105	TF
C1orf122	TFPI
C1orf145	TGFBI
C1orf198	THBS2
C20orf196	THOP1
C20orf197	TIE1
C21orf59	TLR4
C2orf27A	TNFRSF10A
C4BPB	TNFRSF10B
C4orf33	TNFRSF6B
C5	TNFRSF9
C5orf17	TNFSF10
C5orf22	TP53I3
C5orf30	TPSD1
C5orf34	TSPAN8
C5orf4	VIT
C6orf3	VMO1
C6orf62	VSIG2
C7orf26	VSIR
C8orf59	WFIKKN2
C9orf123	WWP2
C9orf84	ZFYVE19
C9orf91	ZP3
CA2
CABP1
CABP5
CACNB3
CAD
CALCOCO2
CALCRL
CALM3
CAMK2N1
CAMKK2
CAMTA1
CANT1
CAPN1
CAPS
CAPS2
CARM1
CARNS1
CASC3
CASP3
CBLN3
CBX4
CC2D2A
CCBL1
CCDC102A
CCDC111
CCDC115
CCDC12
CCDC126
CCDC127
CCDC152
CCDC163P
CCDC174
CCDC24
CCDC57
CCDC9
CCL3L1
CCNG1
CCNT2
CCR9
CCT6B
CD1A
CD200R1
CD27-AS1
CD300E
CD300LD
CD33
CD36
CD3EAP
CD55
CD58
CD83
CD8A
CD97
CDC25B
CDC26
CDC34
CDH26
CDHR1
CDK13
CDK19
CDKL1
CDKN1A
CDKN2B
CDR2
CEBPA
CECR6
CELSR3
CENPC1
CENPK
CEP112
CEP89
CEPT1
CERS3
CERS5
CFL1
CHCHD4P3
CHCHD7
CHIT1
CHMP1A
CHMP2B
CHN1
CHPF2
CHST11
CHST13
CHSY1
CHUK
CILP
CISD2
CKB
CLEC12B
CLEC2D
CLEC4A
CLEC4D
CLEC4E
CLEC4F
CLECL1
CLTCL1
CLUAP1
CLYBL
CMSS1
CMTM6
CNN2P9
CNOT3
CNRIP1
CNTRL
COA1
COG1
COG3
COL10A1
COL11A2
COL27A1
COL6A3
COL9A2
COMMD10
COMMD6
COPA
COPB1
COPB2
COX6B1
COX6C
CPT1A
CPT2
CR1
CRAT
CREG1
CRELD1
CRHR1-IT1
CRIPT
CRMP1
CRNKL1
CROCCP2
CROT
CRTAM
CRTAP
CRY1
CSNK1G3
CST3
CTA-384D8.20
CTB-118N6.3
CTB-27N1.1
CTB-33O18.3
CTB-50L17.9
CTB-55O6.12
CTC-228N24.3
CTC-260E6.6
CTC-428G20.3
CTC-444N24.8
CTC-457L16.2
CTC-550B14.6
CTC-550B14.7
CTD-2012J19.1
CTD-2017D11.1
CTD-2020K17.3
CTD-2085J24.4
CTD-2116N20.1
CTD-2162K18.4
CTD-2184D3.7
CTD-2258A20.4
CTD-2260A17.1
CTD-2324F15.2
CTD-2538C1.2
CTD-2545M3.8
CTD-2555O16.2
CTD-2651B20.3
CTD-3064M3.3
CTD-3131K8.2
CTSB
CTSO
CTSZ
CUL5
CUTA
CWC25
CWF19L2
CYBRD1
CYCSP34
CYFIP2
CYP21A1P
CYP27A1
CYP2C8
CYP2S1
CYP2U1
CYP4F12
DAAM1
DAGLB
DARS
DBNDD1
DBNL
DCAF17
DCBLD2
DCLK2
DCTN5
DDAH2
DDT
DDX10P1
DDX11
DDX12P
DDX19B
DDX31
DDX39B
DDX5
DDX50
DDX60
DDX60L
DENND6B
DEPDC7
DEXI
DFNA5
DGAT1
DGCR6L
DGKE
DHFR
DHODH
DHRS9
DHX33
DHX35
DHX36
DHX57
DIRC2
DLGAP1-AS2
DLK1
DLL1
DMPK
DMWD
DNA2
DNAJB5
DNAJC13
DNASE1
DNM3
DNPH1
DNTTIP1
DOC2B
DPEP2
DPEP3
DPRXP4
DPY19L2
DPY19L2P3
DRAM1
DSCR3
DST
DTWD2
DUS4L
DUSP23
DUSP28
EAF1-AS1
ECD
ECI2
EDEM3
EEA1
EEF1A1
EEF1D
EFCAB1
EFCAB2
EFEMP2
EFHB
EFHD1
EGLN2
EGLN3
EHD4
EIF2A
EIF2AK4
EIF2B4
EIF2C2
EIF2S2
EIF3B
EIF3EP1
ELANE
ELF1
ELL
ELP5
EMR1
EMR3
ENDOG
ENDOU
ENO1
ENOSF1
ENPP3
ENTPD2
ENY2
EOMES
EP300
EPS15L1
EPT1
ERBB3
ERI2
ETAA1
ETFA
EVI2A
EXOC1
EXOC2
EXTL2
F7
FAHD2B
FAM105A
FAM110A
FAM117B
FAM118A
FAM120AOS
FAM126A
FAM149B1
FAM150B
FAM160A1
FAM160A2
FAM167A
FAM169B
FAM174B
FAM177A1
FAM211A
FAM21C
FAM21D
FAM22D
FAM46A
FAM50B
FAM53A
FAM83D
FAM8A1
FASN
FBLL1
FBXL16
FBXO18
FBXO31
FCGR2B
FEM1B
FGD2
FGD6
FGFR2
FGFR4
FGFRL1
FHIT
FHL2
FIG4
FLNB-AS1
FLYWCH2
FMNL3
FMO4
FN1
FN3K
FNIP2
FNTB
FOCAD
FOLR3
FOXO3B
FOXP1-IT1
FPR2
FTSJD1
FUT10
FUT7
FUT8
FXYD7
FYB
FZD2
G0S2
G3BP2
GABARAPL1
GALK2
GAPDHP14
GAS1
GAS7
GAS8
GATC
GATM
GATS
GBP5
GCC2
GCDH
GCFC2
GCHFR
GCNT4
GDF15
GET4
GFRA2
GGCT
GGCX
GHRL
GHRLOS
GID4
GIMAP8
GINS3
GIPC3
GLIPR1L2
GLT25D1
GLTSCR2
GMEB2
GNAI3
GNAO1
GNB1L
GNB4
GNG12-AS1
GNG2
GNG5
GNG8
GNLY
GNPDA2
GOLGA3
GOLGA6L5
GORASP1
GP6
GPA33
GPATCH1
GPATCH2L
GPATCH4
GPR133
GPR25
GPRC5C
GRAMD3
GRHL1
GRN
GSTO2
GTF2E2
GTF2F1
GTF3A
GTPBP4
GUK1
GUSBP2
GYG1
GYPC
GZMA
H2AFZ
H3F3A
H6PD
HAAO
HADH
HAUS4
HBG1
HBG2
HDDC3
HEATR2
HEATR6
HECTD1
HELLS
HELZ2
HERPUD1
HES6
HIGD2A
HINT1
HIST1H2BG
HIVEP2
HLA-DRB5
HLA-J
HLA-U
HLTF
HMBS
HMG20A
HMGB3P32
HMGN2
HNRNPF
HOXA-AS2
HOXB3
HSD17B13
HSD17B1P1
HSD17B7P2
HSD3B7
HSP90AA1
HSPA7
HTATIP2
HYAL3
ICAM3
IDH3B
IDO1
IFFO1
IFI27L1
IFNLR1
IGFLR1
IGHMBP2
IGHV1-2
IGHV1-3
IGLV10-54
IGLV3-12
IGLV3-13
IGLV3-19
IGLV3-21
IGLV5-37
IKBIP
IL16
IL6R
IMMP2L
IMPA1
ING5
INIP
INO80B
INSIG1
INTS6-AS1
INTS8
IPMK
IPO8
IPP
IQCG
IRAK2
IRS1
ITCH
ITIH4
ITPR1-AS1
ITSN1
IVD
JAGN1
JAKMIP2
JARID2
JAZF1
JKAMP
JMJD4
JUP
KATNAL1
KB-431C1.3
KB-431C1.4
KBTBD2
KBTBD8
KCNJ2
KCNMA1
KCNN4
KCNQ5
KCTD11
KDM1B
KDM3B
KDM4B
KDM5B
KIAA0355
KIAA0391
KIAA0430
KIAA0930
KIAA1024
KIAA1279
KIAA1430
KIAA1551
KIAA1737
KIAA2013
KIF26A
KIFAP3
KIFC2
KIR3DX1
KLC3
KLHDC4
KLHDC7B
KLHL42
KLHL8
KLHL9
KLRB1
KLRC2
KLRD1
KLRK1
KRT18
KRT2
KRT222
KRT23
KRT72
KRT73
KRT8P33
KRTCAP3
L3HYPDH
L3MBTL3
LA16c-OS12.2
LAMTOR1
LAMTOR3
LAPTM4B
LARP1
LASP1
LBX2
LCLAT1
LEAP2
LEMD2
LEPR
LEPROT
LGALS12
LGALS2
LGALS9B
LGR4
LGR6
LHFP
LILRA6
LILRB4
LIMA1
LIMK1
LIMS2
LIN54
LINC00152
LINC00189
LINC00338
LINC00544
LINC00562
LINC00852
LINGO2
LINS
LIPA
LL22NC03-86G7.1
LMCD1
LMO7-AS1
LONP2
LPAR5
LPGAT1
LPHN1
LRBA
LRCH4
LRCOL1
LRGUK
LRP3
LRRC27
LRRC32
LRRC37A16P
LRRC4B
LRRC6
LRRC8D
LRRFIP1
LRRK2
LRRN3
LRSAM1
LTBP2
LY6G5B
LY75
LYRM1
LYSMD2
LZTFL1
M6PR
MAEA
MAF1
MAK
MAN1A1
MAN2A2
MAP1LC3B
MAP3K6
MAP4
MAP7
MAPK3
MAPK8
MAPKAPK3
45717
MARCO
MARK2
MARK3
MAST3
MBOAT2
MBP
MCM3AP
MCM6
MCM7
MCOLN3
MDS2
MED10
MED17
MED20
MED22
MED29
MED4
MEGF9
MEPCE
MESDC1
MESP1
METAP1D
METTL18
METTL22
METTL6
METTL8
MFN1
MFSD12
MFSD6
MGST2
MIAT
MICAL1
MIEN1
MIER1
MIR4645
MKNK1-AS1
MLEC
MLK4
MLYCD
MMAA
MMP17
MMP28
MOB2
MORC2-AS1
MORC3
MPC1
MPV17L2
MPZ
MRAS
MRE11A
MRI1
MROH6
MRPL17
MRPL18
MRPL28
MRPL37
MRPL38
MRPL4
MRPL43
MRPL55
MRPS16
MRPS6
MRPS7
MS4A4A
MSH6
MTFMT
MTFP1
MTFR1
MTG1
MTHFD1
MTHFD2
MTMR9
MTOR
MUL1
MUS81
MVB12A
MVB12B
MYBL2
MYBPH
MYCBPAP
MYEF2
MYO1C
MYOF
NAGK
NAPSB
NBL1
NBPF1
NBPF3
NCSTN
NDFIP1
NDUFA3
NDUFAF6
NDUFB10
NDUFS8
NDUFV3
NEDD9
NELFCD
NELL2
NET1
NFATC1
NFKBIL1
NINJ2
NIPA2
NIPAL4
NKTR
NKX6-3
NMI
NMT2
NNT
NOC2L
NOD1
NOD2
NOL12
NOL6
NOP14-AS1
NPDC1
NR1D2
NR2C2
NRBP1
NRBP2
NRDE2
NSFL1C
NSUN2
NSUN7
NT5DC1
NT5E
NT5M
NTN5
NUCKS1
NUDT13
NUDT4
NUMB
NUMBL
OAF
OAS1
OAS3
OAT
OLAH
OLIG1
OR52K2
OSBPL11
OSBPL1A
OSCAR
OXCT1
OXER1
P2RX6
P2RX7
P2RY11
P2RY12
P2RY13
PABPC1
PABPC4
PADI4
PALM
PAM
PANK1
PANK4
PAOX
PAPD4
PAQR6
PARD3B
PARK7
PARL
PARM1
PARP11
PARP9
PAX8
PBX2
PBXIP1
PCCB
PCDH8
PCGF2
PCM1
PCSK4
PDCD1LG2
PDCD6IP
PDCL3P4
PDE4A
PDGFA
PDK1
PEAK1
PEG10
PER3
PES1
PET112
PEX10
PFAS
PFDN1
PGAM5
PGBD5
PGM2L1
PGM5
PHB
PHF10
PHF11
PHF14
PHF19
PHF5A
PI3
PICK1
PIGO
PIH1D1
PIK3CA
PIK3R3
PIK3R5
PILRB
PIN1
PISD
PKP4
PLAC9
PLD1
PLEC
PLGLB1
PLXNA4
PLXNB2
PM20D1
PMM1
PMS2
PMS2CL
PNMA1
PNPLA6
PNPLA7
POFUT2
POLDIP3
POLM
POLR1E
POLR3B
POLR3H
POMGNT1
POMT2
POMZP3
PON2
POP5
POU5F1P3
POU6F1
PP13439
PPAPDC2
PPARG
PPARGC1A
PPIL1
PPM1G
PPOX
PPP1R14A
PPP1R9A
PPP4R4
PQLC2
PRCP
PREB
PRKAG2
PRKCD
PRKXP1
PRMT5
PRMT7
PROC
PROS1
PRPF31
PRPF4
PRR24
PRUNE2
PSAT1
PSMA6
PSMB11
PSMB3
PSMB8
PSMD4
PSMD9
PSMG3-AS1
PSTK
PTBP2
PTGDR
PTGR1
PTPLA
PTPN18
PTPN2
PTPN4
PTPN7
PTPRA
PTRF
PUM2
PUS7
PYCR2
PYROXD1
QDPR
QSER1
RAB15
RAB18
RAB38
RAB5A
RAB7L1
RAF1
RAMP1
RAP1GDS1
RARS
RASA4B
RASGRP4
RASSF4
RB1
RBM43
RBM48
RBM6
RBMS2
RBMXL1
RBP7
RCCD1
RCHY1
RCVRN
RDH13
REEP1
REEP6
RFT1
RFWD3
RGS17
RGS18
RHD
RIMBP3C
RIN2
RINL
RIOK1
RMI1
RNASE6
RNF130
RNF145
RNF149
RNF157
RNF19B
RNF217
RNF44
RNFT2
ROCK2
RP1-140A9.1
RP1-167A14.2
RP1-283E3.8
RP1-59D14.3
RP1-5O6.6
RP11-1029J19.4
RP11-103G8.2
RP11-107F6.3
RP11-10L12.4
RP11-118B22.4
RP11-1197K16.2
RP11-1260E13.4
RP11-1280N14.3
RP11-138B4.1
RP11-13A1.1
RP11-140A10.3
RP11-147L13.8
RP11-154J22.1
RP11-158M2.3
RP11-164P12.4
RP11-169D4.2
RP11-16E12.1
RP11-18I14.7
RP11-195E2.4
RP11-214C8.2
RP11-218E20.6
RP11-229P13.19
RP11-248C1.2
RP11-251A15.4
RP11-277P12.9
RP11-27I1.2
RP11-295M18.2
RP11-295P9.3
RP11-298I3.1
RP11-305L7.1
RP11-307C12.11
RP11-307E17.8
RP11-318C24.2
RP11-322D14.2
RP11-322M19.1
RP11-325F22.2
RP11-325P15.1
RP11-326C3.13
RP11-327F22.6
RP11-340F14.5
RP11-341N2.1
RP11-344E13.3
RP11-356J5.12
RP11-357H14.19
RP11-358M11.2
RP11-362F19.1
RP11-367F23.1
RP11-368I7.2
RP11-384K6.6
RP11-395B7.7
RP11-397E7.4
RP11-398A8.3
RP11-420G6.4
RP11-421L21.3
RP11-424I19.2
RP11-429E11.3
RP11-439E19.3
RP11-439L8.4
RP11-455O6.2
RP11-456P18.2
RP11-457M11.5
RP11-461A8.4
RP11-464D20.6
RP11-465N4.4
RP11-476D10.1
RP11-485G7.6
RP11-492E3.51
RP11-497H16.4
RP11-503G7.2
RP11-526I2.5
RP11-531H8.2
RP11-545E17.3
RP11-564C4.6
RP11-589N15.2
RP11-589P10.5
RP11-605F22.2
RP11-61J19.4
RP11-620J15.3
RP11-62H7.2
RP11-632F7.1
RP11-641A6.2
RP11-645C24.2
RP11-649A18.12
RP11-661A12.9
RP11-672A2.4
RP11-686D22.3
RP11-693J15.5
RP11-701H24.2
RP11-726G1.1
RP11-728F11.4
RP11-745O10.2
RP11-75L1.1
RP11-75L1.2
RP11-767N6.2
RP11-77H9.2
RP11-792D21.2
RP11-796G6.2
RP11-797A18.3
RP11-797A18.4
RP11-797A18.6
RP11-807H22.6
RP11-809N8.4
RP11-81H14.2
RP11-81K2.1
RP11-832A4.5
RP11-834C11.4
RP11-849F2.8
RP11-85F14.5
RP11-85K15.2
RP11-87G24.3
RP13-25N22.1
RP13-93L13.1
RP13-98N21.2
RP13-98N21.3
RP3-393E18.2
RP3-395C13.1
RP3-407E4.4
RP3-430N8.8
RP3-465N24.5
RP4-614O4.12
RP4-717I23.3
RP4-800G7.2
RP5-1125A11.1
RP5-901A4.1
RP5-995J12.2
RP9
RPAP1
RPF1
RPIA
RPL11
RPL13
RPL22L1
RPL27A
RPL8
RPP21
RPRM
RPS10
RPS3A
RPS6KA1
RPS6KA5
RPS6KB2
RPS6KL1
RPTOR
RQCD1
RRN3P1
RRP15
RRP7A
RSAD1
RSL24D1
RTP4
RUNDC3A
RYBP
S100A10
SACM1L
SACS
SAMD12
SAP130
SAP18
SARM1
SARS2
SBF1
SCAMP4
SCGB3A1
SCML4
SDC3
SDHDP6
SDR39U1
SEC11A
SEC31B
SECISBP2
SEMA3C
SEMA6A
SEMG1
SEPW1
SERBP1P3
SERHL
SERHL2
SERINC5
SERPINA1
SERPINB10
SERPINB8
SERPINE1
SESN3
SESTD1
SETD6
SETDB2
SETMAR
SFMBT2
SFTPD
SFXN2
SGCA
SGCB
SGCE
SGMS1
SGSM1
SGSM2
SGTA
SGTB
SH2B2
SH2D1B
SH3BP5-AS1
SH3BP5L
SH3PXD2A
SHARPIN
SHE
SHMT2
SHROOM1
SIGLEC12
SIGLEC18P
SIK2
SIPA1L2
SIRPB2
SIRT5
SIX5
SKAP2
SKIV2L
SLA
SLAMF7
SLBP
SLC10A7
SLC12A1
SLC12A3
SLC16A1
SLC1A4
SLC1A7
SLC22A17
SLC22A18
SLC22A4
SLC22A5
SLC24A4
SLC24A5
SLC25A17
SLC25A24
SLC25A3
SLC25A46
SLC26A1
SLC2A4RG
SLC2A8
SLC31A2
SLC35D1
SLC35E1
SLC39A3
SLC39A9
SLC40A1
SLC41A1
SLC44A5
SLC45A3
SLC45A4
SLC4A7
SLC5A6
SLC9A1
SLFN12
SMARCD2
SMARCE1
SMG1
SMPD4
SMPD4P1
SMTNL1
SNAI3
SNAP29
SNAP47
SNCA
SNHG14
SNORA33
SNRNP27
SNRPB
SNRPC
SNRPD2
SNTB1
SNX2
SNX27
SOAT1
SOD2
SON
SORCS2
SORD
SPATA20
SPATA24
SPATA2L
SPATA5L1
SPATC1
SPECC1
SPECC1L
SPEF2
SPG7
SPI1
SPIRE2
SPOCK2
SPP1
SPPL2A
SPRY2
SPTLC2
SRD5A3-AS1
SRD5A3
SREBF1
SRP68
SRP72
SRPK2
SRPRB
SRRD
SRSF8
SRXN1
SS18L1
SSH2
SSH3
SSU72
ST14
ST3GAL1
ST3GAL5
ST8SIA4
STAG1
STAG3
STAG3L3
STAM
STAP1
STARD10
STARD4
STAT2
STBD1
STK19P
STK24
STK32C
STXBP1
STXBP3
SUCLA2
SUCLG2
SUPT3H
SUPT4H1
SURF6
SUSD4
SWAP70
SYNGR3
SYNJ1
SYT1
SYTL2
SYTL3
TADA3
TAF1C
TAGAP
TATDN2
TBC1D13
TBC1D15
TBC1D8
TBCA
TBCD
TCF19
TCF25
TCIRG1
TCN2
TCP1
TCP11L1
TDG
TENM4
TES
TESK2
TEX101
TFAM
TFB1M
TFF3
TFRC
TGS1
THG1L
THOP1
THUMPD1
THUMPD3
TIAM2
TIMP2
TJP2
TJP3
TKT
TLE4
TLR10
TLR5
TM4SF1
TMC4
TMCO6
TMEM116
TMEM147
TMEM14A
TMEM160
TMEM163
TMEM169
TMEM180
TMEM218
TMEM229B
TMEM255B
TMEM50B
TMEM51
TMEM63A
TMEM63C
TMEM65
TMEM68
TMEM69
TMEM70
TMEM79
TMEM86A
TMEM99
TMPRSS9
TMX1
TNF
TNFAIP8
TNRC6A
TOM1
TOMM34
TOMM40L
TPMT
TPSB2
TPSD1
TPTE2P5
TRAF3
TRAF3IP2
TRAV26-2
TRAV8-5
TRBV2
TRBV3-1
TRBV5-1
TRBV6-7
TRBV6-8
TREM1
TREML4
TRGC2
TRIB2
TRIB3
TRIM13
TRIM16L
TRIM23
TRIM35
TRIM36
TRIM4
TRIM5
TRIM6
TRIM7
TRMT61A
TRPM2
TRPV4
TSPAN14
TSPAN3
TSPAN9
TSPO
TTC12
TTC17
TTC18
TTC24
TTC3
TTC33
TTC37
TTC39B
TTLL12
TTLL4
TTLL5
TUBA1B
TUBB2A
TUBB4A
TYMS
UBA7
UBE2D1
UBE2I
UBE2Z
UBE4B
UBFD1
UBQLNL
UBR3
UBR7
UCKL1
UCP2
UCP3
UFSP1
UHRF1BP1
UPP1
UQCC
UQCR10
URGCP
USF1
USP24
USP3
USP36
USP6NL
UTP18
UTS2
UVRAG
VAMP8
VAPA
VARS2
VCAM1
VENTX
VIPR1-AS1
VIPR1
VMAC
VMO1
VN1R1
VNN3
VPS16
VPS28
VWA5A
VWA8
WAC-AS1
WBSCR22
WDFY4
WDR1
WDR36
WDR41
WDR63
WDR81
WDSUB1
WHAMM
WRAP73
WRN
WSB1
XRCC2
XRCC6BP1
XRN1
XXbac-BPG299F13.16
XYLT1
YEATS2-AS1
YPEL2
YWHAG
YWHAH
ZADH2
ZBTB25
ZBTB32
ZBTB38
ZBTB7C
ZC3H12C
ZC3H8
ZC3HAV1
ZCWPW1
ZDHHC13
ZDHHC14
ZDHHC4
ZFAND5
ZFAT
ZFP64
ZFR2
ZFYVE19
ZNF124
ZNF132
ZNF169
ZNF189
ZNF217
ZNF23
ZNF230
ZNF234
ZNF252P
ZNF30
ZNF302
ZNF324
ZNF396
ZNF404
ZNF431
ZNF446
ZNF471
ZNF503
ZNF513
ZNF544
ZNF547
ZNF548
ZNF554
ZNF584
ZNF592
ZNF598
ZNF600
ZNF66P
ZNF71
ZNF737
ZNF74
ZNF767
ZNF777
ZNF792
ZNF83
ZNF831
ZNF836
ZNF841
ZNF85
ZXDC

## Sheet: TableS4
Tables4. SMR results of 60 candidate genes associated with PCOS
probeID	ProbeChr	Gene	Probe_bp	topSNP	topSNP_chr	topSNP_bp	A1	A2	Freq	b_GWAS	se_GWAS	p_GWAS	b_eQTL	se_eQTL	p_eQTL	b_SMR	se_SMR	p_SMR	p_HEIDI	nsnp_HEIDI	or	lci	uci
ENSG00000049246	1	PER3	7844380	rs170631	1	7852117	G	C	0.0964215	-0.0541174	0.0604998	0.37105	0.328842	0.0546533	1.78e-09	-0.16457	0.186	0.376275	0.0147883	7	0.848258	0.589117	1.22139
ENSG00000158747	1	NBL1	19967048	rs10799826	1	19881693	A	G	0.441352	-0.0202621	0.0328974	0.537949	0.188189	0.0279213	1.58e-11	-0.107669	0.175539	0.539637	0.138184	12	0.897925	0.636529	1.26666
ENSG00000162836	1	ACP6	147101453	rs12145385	1	147129786	G	A	0.717694	-0.0265027	0.0373635	0.478127	0.176183	0.0275963	1.72e-10	-0.150427	0.213377	0.480821	0.965507	11	0.860341	0.566292	1.30708
ENSG00000160712	1	IL6R	154377669	rs4553185	1	154410955	T	C	0.54672	-0.0745491	0.0329805	0.0237963	-0.116374	0.0140717	1.34e-16	0.640599	0.293796	0.0292263	0.875167	7	1.89762	1.0669	3.37515
ENSG00000143162	1	CREG1	167498914	rs78452229	1	167517829	C	T	0.0675944	-0.0527819	0.07755	0.496113	-0.303256	0.0490399	6.26e-10	0.174051	0.257269	0.498703	NA	NA	1.19012	0.718783	1.97052
ENSG00000133063	1	CHIT1	203181955	rs2486950	1	203174670	C	G	0.185885	0.0840326	0.0423402	0.0471781	-0.401463	0.0393988	2.2e-24	-0.209316	0.107447	0.051404	0.965902	9	0.811139	0.657105	1.00128
ENSG00000196352	1	CD55	207494853	rs2914937	1	207488768	A	G	0.744533	0.0592569	0.0376212	0.115235	0.251161	0.0157197	1.84e-57	0.235932	0.150515	0.116999	0.6351	20	1.26609	0.942634	1.70053
ENSG00000203666	1	EFCAB2	245133007	rs61844237	1	245133662	C	G	0.471173	0.0567615	0.033155	0.086896	-0.316814	0.0276404	2.05e-30	-0.179163	0.105812	0.0904134	0.0943739	20	0.83597	0.679394	1.02863
ENSG00000138085	2	ATRAID	27434895	rs3739092	2	27462076	T	C	0.223658	-0.126835	0.0412453	0.00210407	0.159343	0.0166779	1.25e-21	-0.795987	0.271923	0.00341977	0.0290064	20	0.451136	0.264753	0.768728
ENSG00000065911	2	MTHFD2	74425689	rs1095966	2	74419387	C	A	0.535785	-0.0633347	0.033552	0.0590718	-0.115138	0.015977	5.74e-13	0.550076	0.301238	0.0678424	0.990098	11	1.73338	0.960453	3.12834
ENSG00000115523	2	GNLY	85912298	rs12151621	2	85934499	A	C	0.236581	0.0601727	0.0369943	0.103835	0.324356	0.0219674	2.45e-49	0.185514	0.114745	0.10593	0.979554	20	1.20384	0.961379	1.50744
ENSG00000019169	2	MARCO	119699742	rs10184214	2	119717450	C	G	0.238569	0.0580112	0.0358147	0.105284	-0.435087	0.0303379	1.21e-46	-0.133332	0.0828395	0.107501	0.265657	20	0.875174	0.744013	1.02946
ENSG00000123609	2	NMI	152126979	rs34452578	2	152168245	C	G	0.461233	0.0618474	0.0329172	0.0602615	0.0820818	0.0135145	1.25e-09	0.753485	0.41978	0.0726612	0.938668	15	2.12439	0.933062	4.8368
ENSG00000054219	2	LY75	160628362	rs9636280	2	160717852	T	C	0.525845	-0.015472	0.0333673	0.642871	0.502956	0.0259883	1.92e-83	-0.0307621	0.0663614	0.642967	0.0455538	20	0.969706	0.851436	1.1044
ENSG00000163703	3	CRELD1	9975506	rs2270894	3	9975386	G	C	0.215706	0.129787	0.0362817	0.000347304	0.172148	0.0248048	3.92e-12	0.753927	0.237109	0.00147443	0.235592	6	2.12533	1.33535	3.38265
ENSG00000055955	3	ITIH4	52846991	rs12496077	3	52886241	A	G	0.264414	0.0952246	0.0363126	0.00873233	0.567132	0.0288813	7.52e-86	0.167906	0.0645969	0.00934191	0.592461	20	1.18283	1.04216	1.34248
ENSG00000171530	5	TBCA	76986991	rs254398	5	77084524	A	G	0.782306	-0.0220459	0.0427305	0.605906	0.165697	0.0232241	9.7e-13	-0.133049	0.258557	0.606843	0.637764	13	0.875422	0.527387	1.45313
ENSG00000145730	5	PAM	102089685	rs2431530	5	102118007	T	C	0.331014	-0.0427371	0.0339436	0.208008	0.720173	0.033021	1.88e-105	-0.0593428	0.047211	0.208765	0.28055	20	0.942384	0.859094	1.03375
ENSG00000160867	5	FGFR4	176513887	rs6861925	5	176324729	C	G	0.489066	-0.0331639	0.0328722	0.313035	0.275381	0.039885	5.04e-12	-0.120429	0.120638	0.318147	0.969317	9	0.88654	0.699857	1.12302
ENSG00000105854	7	PON2	95034175	rs43038	7	95067311	A	G	0.868787	-0.118676	0.0590411	0.0444253	-0.454824	0.0499599	8.72e-20	0.260927	0.132937	0.0496713	0.607868	16	1.29813	1.00037	1.68452
ENSG00000197646	9	PDCD1LG2	5510545	rs58970962	9	5509678	A	G	0.253479	0.0807265	0.039797	0.0425138	0.278479	0.0499357	2.45e-08	0.289884	0.152068	0.0566151	0.368809	8	1.33627	0.991864	1.80027
ENSG00000133661	10	SFTPD	81697496	rs2493723	10	81657122	G	A	0.550696	0.0240694	0.0330094	0.4659	0.221759	0.0395196	2.01e-08	0.108539	0.150104	0.469625	0.187622	6	1.11465	0.830552	1.49592
ENSG00000110203	11	FOLR3	71825915	rs7939676	11	71870070	T	C	0.0984095	-0.0998361	0.0513882	0.0520427	1.01635	0.0521339	1.21e-84	-0.09823	0.050812	0.0532107	0.298348	20	0.90644	0.820516	1.00136
ENSG00000134539	12	KLRD1	10378657	rs56374289	12	10403478	C	T	0.220676	-0.0889599	0.037488	0.0176433	0.0866234	0.0155506	2.54e-08	-1.02697	0.470403	0.0290228	0.456908	5	0.35809	0.142422	0.900342
ENSG00000110801	12	PSMD9	122326637	rs76105194	12	122318565	A	C	0.315109	-0.0478645	0.034759	0.1685	-0.128274	0.0180471	1.18e-12	0.373143	0.276013	0.176407	0.441619	20	1.45229	0.845487	2.4946
ENSG00000166140	15	ZFYVE19	41099284	rs11070297	15	41099349	T	C	0.380716	-0.0475028	0.0329898	0.149889	-0.208265	0.0214787	3.12e-22	0.228088	0.16014	0.154358	0.971411	20	1.2562	0.91779	1.71938
ENSG00000140263	15	SORD	45315302	rs4774514	15	45374055	T	C	0.0467197	0.194883	0.0862696	0.0238836	-0.447152	0.0644259	3.91e-12	-0.435832	0.202893	0.0317071	0.916523	7	0.646726	0.434525	0.962557
ENSG00000095917	16	TPSD1	1306060	rs2745084	16	1294025	G	A	0.513917	0.0369205	0.0343387	0.282292	0.466	0.0379435	1.14e-34	0.0792285	0.07397	0.284129	0.517196	20	1.08245	0.936362	1.25133
ENSG00000167261	16	DPEP2	68021297	rs77971272	16	67559458	T	C	0.0367793	0.0657501	0.141796	0.642867	0.199047	0.0287965	4.77e-12	0.330324	0.713976	0.643612	0.380154	6	1.39142	0.343328	5.63906
ENSG00000131165	16	CHMP1A	89710839	rs35414122	16	89742979	G	A	0.0884692	0.0103156	0.0467468	0.82535	-0.143604	0.0245916	5.23e-09	-0.0718337	0.325758	0.825472	0.434397	8	0.930686	0.491487	1.76236
ENSG00000166401	18	SERPINB8	61637159	rs9961615	18	61637672	G	C	0.285288	0.0752152	0.0370525	0.0423604	-0.201298	0.0216898	1.68e-20	-0.373651	0.18842	0.0473585	0.200918	20	0.688217	0.475707	0.995662
ENSG00000167641	19	PPP1R14A	38741877	rs11673222	19	38824344	A	G	0.22167	-0.03346	0.0377965	0.376012	-0.305464	0.0482269	2.39e-10	0.109538	0.124937	0.380625	0.397475	14	1.11576	0.87342	1.42535
ENSG00000105383	19	CD33	51728320	rs2455069	19	51728641	G	A	0.44831	-0.0659281	0.0335039	0.0490942	0.135154	0.0185924	3.61e-13	-0.4878	0.256816	0.0575102	0.516045	5	0.613976	0.371146	1.01568
ENSG00000088833	20	NSFL1C	1422807	rs6033861	20	1448708	C	T	0.287276	-0.118776	0.0417793	0.00447003	-0.199577	0.0139196	1.27e-46	0.595139	0.213415	0.00529285	0.488499	20	1.81328	1.19345	2.75504
ENSG00000101439	20	CST3	23608534	rs911119	20	23612737	T	C	0.767396	0.0510081	0.0396178	0.197918	0.202097	0.02155	6.72e-21	0.252394	0.197872	0.202118	0.865026	20	1.2871	0.873336	1.8969
ENSG00000124102	20	PI3	43803517	rs13038342	20	43800232	A	G	0.161034	0.109786	0.0403022	0.00644807	-0.261917	0.0361029	4.02e-13	-0.419163	0.164364	0.0107656	0.160135	13	0.657597	0.476486	0.907547
ENSG00000099940	22	SNAP29	21213271	rs2072514	22	21099478	G	A	0.400596	0.0799403	0.0383546	0.0371381	0.268221	0.0190337	4.26e-45	0.298039	0.144552	0.0392255	0.400308	20	1.34721	1.01483	1.78847

## Sheet: TableS5
TableS5. Mediation MR results of CpG sites regulating IL6R and SNAP29
gene	CpG sites_id	nsnp.x	beta.x	se.x	pvalue.x	nsnp.y	beta.y	se.y	pvalue.y	beta_all	beta1	beta2	beta12	beta_dir	se	Z	P	lci	uci	beta12_p	lci_p	uci_p
IL6R	cg09257526	6	-0.299359	0.101317	0.00313008	6	-0.295816	0.042618	3.89e-12	-0.299359	-0.295816	0.459542	-0.13594	-0.163419	0.0913139	-1.48871	0.136564	-0.314915	0.0430354	0.454103	1.05197	-0.143759
IL6R	cg13549904	10	-0.155584	0.074428	0.0365819	10	-0.238758	0.048475	8.42e-07	-0.155584	-0.238758	0.459542	-0.109719	-0.0458651	0.091177	-1.20337	0.228835	-0.288426	0.0689876	0.705208	1.85382	-0.44341
IL6R	cg20688791	5	-0.394122	0.137243	0.00408259	5	-0.40247	0.0673591	2.3e-09	-0.394122	-0.40247	0.459542	-0.184952	-0.20917	0.0944153	-1.95892	0.050122	-0.370006	0.000101864	0.469277	0.938812	-0.000258458
IL6R	cg21262032	19	-0.136407	0.0362087	0.000165071	17	-0.109652	0.0130195	3.7e-17	-0.136407	-0.109652	0.459542	-0.0503899	-0.0860167	0.0904507	-0.557098	0.577461	-0.227673	0.126893	0.36941	1.66908	-0.93026
SNAP29	cg00335892	12	-0.102583	0.0426256	0.0161019	11	-0.489339	0.202951	0.0159035	-0.102583	-0.489339	0.096347	-0.0471464	-0.0554362	0.0993861	-0.474376	0.635232	-0.241943	0.14765	0.459594	2.35852	-1.43933
SNAP29	cg20180721	14	-0.0911176	0.0426697	0.0327269	13	-0.390112	0.183851	0.0338467	-0.0911176	-0.390112	0.096347	-0.0375861	-0.0535314	0.0718253	-0.523299	0.600766	-0.178364	0.103192	0.412501	1.95751	-1.13251

## Sheet: TableS6
TableS6. Cell type–specific MR results based on sc-eQTLs across 14 immune cell types
gene	cell	nsnp	method	b	se	or	or_lci95	or_uci95	pvalue
CRELD1	bmem	2	Inverse variance weighted	0.37038	0.305672	1.44829	0.795538	2.63662	0.22563
CRELD1	cd4et	2	Inverse variance weighted	0.665473	0.356228	1.94541	0.967795	3.91056	0.0617472
CRELD1	cd4nc	4	Inverse variance weighted	0.527337	0.36361	1.69441	0.830823	3.45566	0.146979
CRELD1	cd8et	3	Inverse variance weighted	-0.732456	0.239629	0.480727	0.300554	0.768909	0.00223844
CRELD1	cd8nc	4	Inverse variance weighted	-0.465809	0.211537	0.627627	0.414608	0.950092	0.0276636
CRELD1	dc	2	Inverse variance weighted	-1.03132	0.357542	0.356537	0.176912	0.718539	0.00392081
CRELD1	mononc	3	Inverse variance weighted	0.188544	0.264	1.20749	0.719717	2.02584	0.475116
CRELD1	nk	3	Inverse variance weighted	-0.458258	0.257392	0.632385	0.381843	1.04732	0.0750126
CRELD1	plasma	3	Inverse variance weighted	-0.321159	0.225077	0.725308	0.466588	1.12749	0.153612
IL6R	plasma	3	Inverse variance weighted	-0.0173328	0.209382	0.982817	0.651993	1.4815	0.934026
ITIH4	bmem	2	Inverse variance weighted	-0.268568	0.246065	0.764473	0.471962	1.23828	0.275074
ITIH4	cd4et	2	Inverse variance weighted	0.501579	0.469301	1.65133	0.658197	4.14295	0.285169
ITIH4	cd4nc	15	Inverse variance weighted	0.236022	0.0911078	1.2662	1.05913	1.51376	0.00958128
ITIH4	cd8et	7	Inverse variance weighted	-0.187552	0.20721	0.828986	0.552289	1.24431	0.365398
ITIH4	cd8nc	6	Inverse variance weighted	0.298135	0.178791	1.34734	0.94905	1.91279	0.0954128
ITIH4	cd8s100b	3	Inverse variance weighted	0.184406	0.628459	1.2025	0.350858	4.12137	0.769197
ITIH4	mononc	7	Inverse variance weighted	0.296546	0.174991	1.3452	0.954626	1.89559	0.0901443
NSFL1C	bin	2	Inverse variance weighted	0.451555	0.556399	1.57075	0.527827	4.67438	0.41704
NSFL1C	bmem	2	Inverse variance weighted	-0.0564306	0.311256	0.945132	0.513507	1.73956	0.856132
NSFL1C	cd4sox4	6	Inverse variance weighted	-0.00799669	0.164067	0.992035	0.719234	1.36831	0.961126
NSFL1C	cd8et	2	Inverse variance weighted	0.133961	0.312474	1.14335	0.619719	2.10942	0.668133
NSFL1C	cd8nc	3	Inverse variance weighted	-0.535571	0.279713	0.585335	0.338305	1.01275	0.0555292
NSFL1C	dc	2	Inverse variance weighted	-0.066018	0.309376	0.936114	0.510484	1.71662	0.831022
NSFL1C	monoc	7	Inverse variance weighted	0.000976796	0.136425	1.00098	0.76612	1.30783	0.994287
NSFL1C	mononc	2	Inverse variance weighted	-0.0792709	0.443148	0.92379	0.387577	2.20185	0.858031
NSFL1C	nk	2	Inverse variance weighted	-0.287837	0.196782	0.749884	0.509905	1.1028	0.143544
NSFL1C	plasma	3	Inverse variance weighted	0.316556	0.279507	1.37239	0.79352	2.37355	0.257402
PON2	cd8et	2	Inverse variance weighted	0.074201	0.574708	1.07702	0.34916	3.3222	0.89727
PON2	monoc	9	Inverse variance weighted	0.425205	0.108514	1.5299	1.23679	1.89249	8.91e-05
PON2	mononc	5	Inverse variance weighted	0.0228396	0.24631	1.0231	0.63133	1.65799	0.92612
PON2	nk	10	Inverse variance weighted	0.256226	0.119689	1.29204	1.02187	1.63365	0.0322927
PON2	nkr	4	Inverse variance weighted	0.321219	0.153709	1.37881	1.02015	1.86356	0.0366372
SNAP29	bin	5	Inverse variance weighted	-0.13876	0.169304	0.870437	0.62463	1.21297	0.412449
SNAP29	cd4et	8	Inverse variance weighted	0.168894	0.111809	1.18399	0.95099	1.47409	0.130901
SNAP29	cd4nc	10	Inverse variance weighted	0.124502	0.0844909	1.13258	0.959733	1.33657	0.140602
SNAP29	cd8et	8	Inverse variance weighted	-0.014822	0.107496	0.985287	0.798106	1.21637	0.890332
SNAP29	cd8nc	7	Inverse variance weighted	0.138711	0.116113	1.14879	0.914964	1.44238	0.232236
SNAP29	cd8s100b	4	Inverse variance weighted	-0.394818	0.278925	0.673802	0.390038	1.16402	0.156922
SNAP29	dc	6	Inverse variance weighted	-0.287492	0.152136	0.750143	0.556728	1.01075	0.0587973
SNAP29	monoc	5	Inverse variance weighted	0.218827	0.180679	1.24462	0.87345	1.77351	0.225843
SNAP29	mononc	7	Inverse variance weighted	0.205766	0.143527	1.22847	0.927235	1.62756	0.151677
SNAP29	nk	13	Inverse variance weighted	0.130335	0.0605819	1.13921	1.01166	1.28284	0.0314465
SNAP29	nkr	5	Inverse variance weighted	0.291108	0.198889	1.33791	0.906002	1.97571	0.143283
SNAP29	plasma	3	Inverse variance weighted	-0.42009	0.31491	0.656988	0.354406	1.21791	0.182204
